# Supplementary material for: Foxp3+ Regulatory T Cells Restrain Th1 Response Shielding the Brain from Lethal Inflammatory Damage during Cryptococcal Meningoencephalitis
Source: Res Sq. 2025 Jul 30:rs.3.rs-7142999. Preprint. [Version 1] doi: 10.21203/rs.3.rs-7142999/v1 (PMC12324597; doi:10.21203/rs.3.rs-7142999/v1)
Supplement: Supplement 1 — Extended data table NanoString and Single cell analyses. a Protein-protein interactions for NanoString analysis. b Top 10 markers for T cell clusters. c Differentially expressed genes between Tregs and T effector cells. [file xtendeddatatableNanoStringandSinglecellanalyses.xlsx]

## Sheet: WT vs Naive
Extended data table NanoString and Single cell analyses. a
		Log2fold change	std error (log2)	Lower confidence limit (log2)	Upper confidence limit (log2)	Linear fold change	Lower confidence limit (linear)	Upper confidence limit (linear)	P-value	BY.p.value	method	Gene.sets	probe.ID
Fcrls	Fcrls-mRNA	-4.08	0.403	-4.87	-3.29	0.0591	0.0342	0.102	5.41e-05	0.00276	loglinear	Activated Microglia	NM_030707.3:925	Fcrls	mRNA		a Differentially genes between WT mice vs Naïve mice.
Pllp	Pllp-mRNA	-1.04	0.105	-1.24	-0.835	0.486	0.422	0.561	6.01e-05	0.003	loglinear	Myelination	NM_026385.3:345	Pllp	mRNA
Npas4	Npas4-mRNA	-1.02	0.27	-1.54	-0.488	0.494	0.343	0.713	0.00928	0.136	lm.nb	Activated Microglia, Neural Connectivity, Vesicle Trafficking	NM_153553.4:580	Npas4	mRNA
Cd9	Cd9-mRNA	1.01	0.0551	0.902	1.12	2.01	1.87	2.17	1.69e-06	0.000284	loglinear	Activated Microglia, Disease Association, Myelination	NM_007657.3:620	Cd9	mRNA
Nostrin	Nostrin-mRNA	1.01	0.291	0.442	1.58	2.02	1.36	2.99	0.0131	0.177	loglinear		NM_181547.3:1452	Nostrin	mRNA
Atp7a	Atp7a-mRNA	1.02	0.0497	0.925	1.12	2.03	1.9	2.17	8.64e-07	0.000185	loglinear	Oxidative Stress, Transmitter Synthesis and Storage	NM_001109757.2:1200	Atp7a	mRNA
Hgf	Hgf-mRNA	1.02	0.264	0.507	1.54	2.03	1.42	2.91	0.00814	0.123	lm.nb	Angiogenesis, Cytokines, Disease Association, Growth Factor Signaling, Myelination, Oxidative Stress	NM_010427.5:483	Hgf	mRNA
Erg	Erg-mRNA	1.05	0.282	0.498	1.6	2.07	1.41	3.04	0.0098	0.142	loglinear	Chromatin Modification, Disease Association	NM_133659.2:992	Erg	mRNA
Naglu	Naglu-mRNA	1.07	0.0946	0.882	1.25	2.1	1.84	2.38	2.9e-05	0.00174	loglinear	Activated Microglia, Autophagy	NM_013792.2:2334	Naglu	mRNA
Mapkapk2	Mapkapk2-mRNA	1.07	0.109	0.853	1.28	2.09	1.81	2.43	6.44e-05	0.00313	loglinear	Growth Factor Signaling, Trophic Factors	NM_008551.1:1991	Mapkapk2	mRNA
Myc	Myc-mRNA	1.07	0.222	0.636	1.51	2.1	1.55	2.84	0.00294	0.0566	loglinear	Disease Association, Growth Factor Signaling	NM_010849.4:630	Myc	mRNA
Rras	Rras-mRNA	1.09	0.112	0.873	1.31	2.13	1.83	2.48	6.55e-05	0.00313	loglinear	Angiogenesis, Growth Factor Signaling, Transmitter Response and Reuptake	NM_009101.2:282	Rras	mRNA
Scamp2	Scamp2-mRNA	1.12	0.0848	0.955	1.29	2.17	1.94	2.44	1.16e-05	0.000959	loglinear	Activated Microglia	NM_022813.3:526	Scamp2	mRNA
Pfn1	Pfn1-mRNA	1.12	0.102	0.921	1.32	2.18	1.89	2.5	3.45e-05	0.002	loglinear	Neural Connectivity, Neuronal Cytoskeleton	NM_011072.4:266	Pfn1	mRNA
Il1r1	Il1r1-mRNA	1.14	0.122	0.897	1.38	2.2	1.86	2.6	8.85e-05	0.00388	loglinear	Activated Microglia, Axon and Dendrite Structure, Cytokines, Disease Association, Growth Factor Signaling, Neural Connectivity, Oxidative Stress	NM_001123382.1:820	Il1r1	mRNA
Flt4	Flt4-mRNA	1.17	0.102	0.965	1.37	2.24	1.95	2.58	2.71e-05	0.00171	loglinear	Angiogenesis, Cytokines	NM_008029.3:5690	Flt4	mRNA
Cdk2	Cdk2-mRNA	1.18	0.196	0.799	1.57	2.27	1.74	2.96	0.000936	0.0242	loglinear	Chromatin Modification, Disease Association, Oxidative Stress	NM_016756.4:831	Cdk2	mRNA
Eng	Eng-mRNA	1.19	0.151	0.899	1.49	2.29	1.86	2.81	0.000214	0.00756	lm.nb	Angiogenesis	NM_001146350.1:574	Eng	mRNA
Hpgds	Hpgds-mRNA	1.3	0.15	1	1.59	2.46	2	3.01	0.000133	0.00527	loglinear	Lipid Metabolism	NM_019455.4:194	Hpgds	mRNA
Npc2	Npc2-mRNA	1.33	0.202	0.94	1.73	2.52	1.92	3.32	0.000572	0.0167	lm.nb	Activated Microglia, Autophagy, Disease Association	NM_023409.4:3095	Npc2	mRNA
Man2b1	Man2b1-mRNA	1.37	0.0994	1.18	1.57	2.59	2.27	2.97	8.91e-06	0.000849	loglinear	Autophagy	NM_010764.2:1658	Man2b1	mRNA
Ltbr	Ltbr-mRNA	1.4	0.202	1	1.8	2.64	2.01	3.48	0.000451	0.0137	lm.nb	Cytokines, Disease Association	NM_010736.3:1962	Ltbr	mRNA
Pla2g16	Pla2g16-mRNA	1.41	0.0685	1.28	1.55	2.66	2.43	2.92	8.45e-07	0.000185	loglinear	Growth Factor Signaling, Lipid Metabolism	NM_139269.2:568	Pla2g16	mRNA
Cdkn1a	Cdkn1a-mRNA	1.43	0.136	1.16	1.7	2.69	2.24	3.24	4.32e-05	0.00234	loglinear	Apoptosis, Disease Association	NM_007669.4:1670	Cdkn1a	mRNA
Lsr	Lsr-mRNA	1.43	0.162	1.11	1.75	2.69	2.16	3.36	0.000119	0.00479	loglinear	Lipid Metabolism	NM_001164184.1:445	Lsr	mRNA
P2rx7	P2rx7-mRNA	1.44	0.0907	1.26	1.61	2.7	2.39	3.06	4.04e-06	0.00052	loglinear	Disease Association, Neural Connectivity, Transmitter Release, Transmitter Response and Reuptake, Vesicle Trafficking	NM_001038839.2:378	P2rx7	mRNA
Tgfbr2	Tgfbr2-mRNA	1.45	0.077	1.3	1.6	2.74	2.47	3.04	1.43e-06	0.000248	loglinear	Angiogenesis, Cytokines, Growth Factor Signaling	NM_009371.2:475	Tgfbr2	mRNA
Trem2	Trem2-mRNA	1.56	0.0518	1.46	1.66	2.95	2.75	3.16	8.9e-08	4.76e-05	loglinear	Activated Microglia, Disease Association	NM_031254.2:646	Trem2	mRNA
Ang	Ang-mRNA	1.57	0.446	0.694	2.44	2.97	1.62	5.44	0.0126	0.171	lm.nb	Angiogenesis, Disease Association	NM_007447.2:425	Ang	mRNA
Mmp14	Mmp14-mRNA	1.61	0.0999	1.42	1.81	3.05	2.67	3.5	3.62e-06	0.000494	loglinear	Activated Microglia, Angiogenesis, Disease Association, Matrix Remodeling, Oxidative Stress	NM_008608.3:554	Mmp14	mRNA
Nfkbia	Nfkbia-mRNA	1.7	0.0828	1.53	1.86	3.24	2.89	3.63	8.81e-07	0.000185	loglinear	Apoptosis, Disease Association, Transmitter Response and Reuptake, Trophic Factors	NM_010907.2:646	Nfkbia	mRNA
Marco	Marco-mRNA	1.76	0.626	0.53	2.98	3.38	1.44	7.91	0.0309	0.365	loglinear	Activated Microglia	NM_010766.2:350	Marco	mRNA
Csf1r	Csf1r-mRNA	1.78	0.0627	1.66	1.91	3.44	3.16	3.75	1.25e-07	5.25e-05	loglinear	Activated Microglia, Cytokines, Disease Association, Growth Factor Signaling	NM_001037859.1:3655	Csf1r	mRNA
Il6ra	Il6ra-mRNA	1.79	0.111	1.57	2.01	3.46	2.98	4.02	3.56e-06	0.000494	loglinear	Activated Microglia, Cytokines	NM_010559.2:2825	Il6ra	mRNA
Nfe2l2	Nfe2l2-mRNA	1.79	0.121	1.55	2.03	3.45	2.93	4.07	6.08e-06	0.000681	loglinear	Oxidative Stress, Unfolded Protein Response	NR_132727.1:193	Nfe2l2	mRNA
Csf1	Csf1-mRNA	1.8	0.0656	1.67	1.93	3.48	3.19	3.81	1.55e-07	6e-05	loglinear	Activated Microglia, Cytokines	NM_001113530.1:833	Csf1	mRNA
Hexb	Hexb-mRNA	1.81	0.0618	1.69	1.93	3.51	3.23	3.82	1.04e-07	4.76e-05	loglinear	Autophagy, Disease Association, Myelination	NM_010422.2:805	Hexb	mRNA
Pla2g4a	Pla2g4a-mRNA	1.83	0.139	1.56	2.11	3.57	2.95	4.31	1.14e-05	0.000959	loglinear	Disease Association, Growth Factor Signaling, Lipid Metabolism, Oxidative Stress, Transmitter Release, Transmitter Response and Reuptake	NM_008869.2:1525	Pla2g4a	mRNA
Gusb	Gusb-mRNA	1.84	0.117	1.61	2.07	3.57	3.05	4.19	4.22e-06	0.00052	loglinear	Activated Microglia, Autophagy	NM_010368.1:1735	Gusb	mRNA
Mmp19	Mmp19-mRNA	1.84	0.407	1.04	2.64	3.58	2.06	6.23	0.00398	0.0713	lm.nb	Angiogenesis, Matrix Remodeling	NM_021412.2:1140	Mmp19	mRNA
Tmem119	Tmem119-mRNA	1.87	0.15	1.57	2.16	3.65	2.97	4.47	1.65e-05	0.00122	loglinear	Activated Microglia, Disease Association	NM_146162.2:1550	Tmem119	mRNA
Il13ra1	Il13ra1-mRNA	1.9	0.175	1.56	2.24	3.73	2.94	4.74	3.62e-05	0.00205	loglinear	Cytokines, Disease Association	NM_133990.4:845	Il13ra1	mRNA
Ptgs2	Ptgs2-mRNA	1.95	0.159	1.64	2.26	3.86	3.11	4.79	1.8e-05	0.0013	lm.nb	Activated Microglia, Angiogenesis, Disease Association, Lipid Metabolism, Oxidative Stress, Transmitter Release, Transmitter Response and Reuptake, Vesicle Trafficking	NM_011198.3:675	Ptgs2	mRNA
Icam2	Icam2-mRNA	1.97	0.143	1.69	2.25	3.91	3.22	4.75	9.26e-06	0.000849	loglinear	Disease Association, Tissue Integrity	NM_010494.1:375	Icam2	mRNA
Cxcr4	Cxcr4-mRNA	2.04	0.385	1.29	2.8	4.12	2.44	6.95	0.00183	0.0388	lm.nb	Activated Microglia, Cytokines, Disease Association, Myelination	NM_009911.3:704	Cxcr4	mRNA
Angpt2	Angpt2-mRNA	2.04	0.643	0.783	3.31	4.12	1.72	9.89	0.0191	0.241	lm.nb	Angiogenesis, Disease Association	NM_007426.3:2020	Angpt2	mRNA
Il4ra	Il4ra-mRNA	2.07	0.127	1.82	2.32	4.2	3.54	4.99	3.35e-06	0.000483	loglinear	Cytokines, Disease Association	NM_001008700.3:2908	Il4ra	mRNA
Itga5	Itga5-mRNA	2.1	0.357	1.4	2.8	4.28	2.64	6.96	0.00108	0.0262	lm.nb	Activated Microglia, Angiogenesis, Disease Association, Neural Connectivity	NM_001314041.1:2622	Itga5	mRNA
Itgam	Itgam-mRNA	2.11	0.199	1.72	2.5	4.32	3.3	5.67	4.13e-05	0.00229	lm.nb	Disease Association, Tissue Integrity	NM_008401.2:155	Itgam	mRNA
Fas	Fas-mRNA	2.13	0.252	1.63	2.62	4.37	3.1	6.15	0.000151	0.00582	loglinear	Apoptosis, Axon and Dendrite Structure, Cytokines, Disease Association, Growth Factor Signaling, Oxidative Stress	NM_007987.2:84	Fas	mRNA
Cd33	Cd33-mRNA	2.17	0.112	1.95	2.38	4.49	3.85	5.22	1.23e-06	0.000233	loglinear	Activated Microglia, Disease Association	NM_001111058.1:405	Cd33	mRNA
Stat3	Stat3-mRNA	2.22	0.1	2.02	2.42	4.66	4.07	5.34	5.57e-07	0.000141	loglinear	Disease Association, Growth Factor Signaling	NM_213659.2:1360	Stat3	mRNA
Tnfrsf1a	Tnfrsf1a-mRNA	2.28	0.103	2.08	2.48	4.87	4.23	5.59	5.37e-07	0.000141	loglinear	Apoptosis, Cytokines, Disease Association, Growth Factor Signaling	NM_011609.2:615	Tnfrsf1a	mRNA
Casp7	Casp7-mRNA	2.35	0.122	2.11	2.59	5.11	4.33	6.03	1.25e-06	0.000233	loglinear	Apoptosis, Disease Association	NM_007611.2:1468	Casp7	mRNA
Tcirg1	Tcirg1-mRNA	2.38	0.155	2.07	2.68	5.19	4.21	6.4	4.79e-06	0.000562	loglinear	Autophagy, Disease Association, Transmitter Synthesis and Storage	NM_001136091.1:1345	Tcirg1	mRNA
Myd88	Myd88-mRNA	2.4	0.177	2.05	2.74	5.26	4.13	6.69	1.02e-05	0.000888	lm.nb	Disease Association, Neural Connectivity	NM_010851.2:1595	Myd88	mRNA
Tgfb1	Tgfb1-mRNA	2.42	0.0946	2.24	2.61	5.36	4.71	6.09	2.33e-07	7.36e-05	loglinear	Activated Microglia, Axon and Dendrite Structure, Chromatin Modification, Cytokines, Growth Factor Signaling, Myelination	NM_011577.1:1470	Tgfb1	mRNA
Gfap	Gfap-mRNA	2.43	0.143	2.15	2.71	5.38	4.43	6.53	2.64e-06	0.000404	lm.nb	Disease Association, Neuronal Cytoskeleton, Vesicle Trafficking	NM_001131020.1:610	Gfap	mRNA
Msn	Msn-mRNA	2.44	0.134	2.18	2.7	5.42	4.52	6.5	1.8e-06	0.000293	loglinear	Disease Association, Neuronal Cytoskeleton	NM_010833.2:515	Msn	mRNA
Il15ra	Il15ra-mRNA	2.45	0.33	1.8	3.1	5.46	3.49	8.55	0.000309	0.0101	loglinear	Cytokines, Disease Association	NM_008358.2:800	Il15ra	mRNA
Cp	Cp-mRNA	2.5	0.159	2.19	2.82	5.67	4.57	7.04	4.16e-06	0.00052	lm.nb	Disease Association	NM_001042611.1:1750	Cp	mRNA
Grn	Grn-mRNA	2.55	0.0965	2.36	2.74	5.85	5.13	6.67	1.95e-07	6.56e-05	loglinear	Activated Microglia, Disease Association	NM_008175.3:2010	Grn	mRNA
Casp8	Casp8-mRNA	2.56	0.178	2.21	2.91	5.89	4.63	7.5	7.01e-06	0.000723	loglinear	Activated Microglia, Apoptosis, Disease Association	NM_009812.2:1463	Casp8	mRNA
Osmr	Osmr-mRNA	2.59	0.208	2.19	3	6.04	4.55	8.01	1.63e-05	0.00122	loglinear	Cytokines, Disease Association	NM_011019.3:395	Osmr	mRNA
Tlr4	Tlr4-mRNA	2.59	0.235	2.13	3.05	6.02	4.38	8.28	3.29e-05	0.00193	loglinear	Apoptosis, Disease Association	NM_021297.2:2510	Tlr4	mRNA
Nlrp3	Nlrp3-mRNA	2.6	0.168	2.27	2.93	6.08	4.84	7.63	4.55e-06	0.000547	loglinear	Activated Microglia, Disease Association	NM_145827.3:508	Nlrp3	mRNA
C4a	C4a-mRNA	2.63	0.19	2.26	3	6.2	4.79	8.02	8.71e-06	0.000846	loglinear	Activated Microglia, Angiogenesis, Disease Association	NM_011413.2:4186	C4a	mRNA
Hmox1	Hmox1-mRNA	2.68	0.303	2.08	3.27	6.39	4.23	9.64	0.000117	0.00479	lm.nb	Angiogenesis, Disease Association, Oxidative Stress	NM_010442.2:610	Hmox1	mRNA
Lrrc25	Lrrc25-mRNA	2.69	0.238	2.23	3.16	6.47	4.68	8.93	2.83e-05	0.00172	loglinear		NM_153074.3:246	Lrrc25	mRNA
Fasl	Fasl-mRNA	2.7	0.626	1.47	3.93	6.5	2.78	15.2	0.005	0.0857	lm.nb	Angiogenesis, Apoptosis, Cytokines, Growth Factor Signaling, Trophic Factors	NM_010177.3:645	Fasl	mRNA
Cd68	Cd68-mRNA	2.76	0.203	2.36	3.15	6.76	5.13	8.9	9.88e-06	0.000888	lm.nb	Activated Microglia, Autophagy, Disease Association	NM_009853.1:636	Cd68	mRNA
Ccr5	Ccr5-mRNA	2.79	0.221	2.36	3.22	6.91	5.12	9.32	1.5e-05	0.0012	lm.nb	Activated Microglia, Cytokines, Disease Association	NM_009917.5:1340	Ccr5	mRNA
Cd44	Cd44-mRNA	2.92	0.205	2.52	3.32	7.56	5.72	9.99	7.61e-06	0.000753	lm.nb	Activated Microglia, Disease Association	NM_009851.2:3075	Cd44	mRNA
Il10ra	Il10ra-mRNA	3.04	0.113	2.82	3.26	8.22	7.05	9.58	1.72e-07	6.2e-05	loglinear	Cytokines, Disease Association	NM_008348.2:2522	Il10ra	mRNA
Spi1	Spi1-mRNA	3.33	0.159	3.02	3.64	10.1	8.11	12.5	7.69e-07	0.000185	loglinear	Chromatin Modification	NM_011355.1:200	Spi1	mRNA
Plcb2	Plcb2-mRNA	3.36	0.735	1.92	4.8	10.3	3.79	27.9	0.00379	0.0693	loglinear	Disease Association, Growth Factor Signaling, Transmitter Release, Transmitter Response and Reuptake	NM_177568.2:4335	Plcb2	mRNA
Sp100	Sp100-mRNA	3.37	0.113	3.15	3.59	10.3	8.86	12	9.59e-08	4.76e-05	loglinear	Angiogenesis	NM_013673.3:410	Sp100	mRNA
C1qc	C1qc-mRNA	3.38	0.0745	3.24	3.53	10.4	9.43	11.5	7.63e-09	9.52e-06	loglinear	Activated Microglia, Angiogenesis, Disease Association	NM_007574.2:708	C1qc	mRNA
C1qb	C1qb-mRNA	3.4	0.0508	3.3	3.5	10.6	9.85	11.3	7.45e-10	1.3e-06	loglinear	Activated Microglia, Angiogenesis, Disease Association	NM_009777.2:865	C1qb	mRNA
Ncf1	Ncf1-mRNA	3.41	0.229	2.96	3.86	10.6	7.8	14.5	5.73e-06	0.000657	loglinear	Oxidative Stress	NM_001286037.1:970	Ncf1	mRNA
Tnfrsf1b	Tnfrsf1b-mRNA	3.57	0.302	2.98	4.16	11.9	7.87	17.9	2.21e-05	0.00149	lm.nb	Axon and Dendrite Structure, Cytokines, Disease Association	NM_011610.3:3270	Tnfrsf1b	mRNA
Napsa	Napsa-mRNA	3.58	0.611	2.39	4.78	12	5.23	27.5	0.00109	0.0263	lm.nb	Autophagy	NM_008437.1:1144	Napsa	mRNA
Tspo	Tspo-mRNA	3.61	0.246	3.13	4.09	12.2	8.73	17	6.27e-06	0.000688	lm.nb	Disease Association, Neural Connectivity, Transmitter Response and Reuptake, Vesicle Trafficking	NM_009775.4:241	Tspo	mRNA
C1qa	C1qa-mRNA	3.7	0.0555	3.59	3.81	13	12	14	7.72e-10	1.3e-06	loglinear	Activated Microglia, Angiogenesis, Disease Association	NM_007572.2:566	C1qa	mRNA
Casp1	Casp1-mRNA	3.7	0.258	3.19	4.21	13	9.15	18.5	7.26e-06	0.000733	lm.nb	Apoptosis, Disease Association	NM_009807.2:259	Casp1	mRNA
Cd14	Cd14-mRNA	3.71	0.647	2.44	4.98	13.1	5.42	31.5	0.00123	0.0287	loglinear	Disease Association, Growth Factor Signaling	NM_009841.3:235	Cd14	mRNA
Il1b	Il1b-mRNA	3.82	0.337	3.16	4.48	14.1	8.94	22.3	2.81e-05	0.00172	lm.nb	Activated Microglia, Angiogenesis, Chromatin Modification, Cytokines, Disease Association, Growth Factor Signaling, Oxidative Stress	NM_008361.3:1120	Il1b	mRNA
Tlr2	Tlr2-mRNA	4.01	0.128	3.76	4.26	16.1	13.5	19.1	7e-08	4.41e-05	loglinear	Activated Microglia, Disease Association	NM_011905.2:255	Tlr2	mRNA
Cd40	Cd40-mRNA	4.43	0.39	3.66	5.19	21.5	12.7	36.5	2.79e-05	0.00172	lm.nb	Cytokines, Tissue Integrity	NM_011611.2:1425	Cd40	mRNA
Ccr2	Ccr2-mRNA	4.5	0.367	3.78	5.22	22.6	13.7	37.2	1.81e-05	0.0013	lm.nb	Activated Microglia, Angiogenesis, Axon and Dendrite Structure, Cytokines, Disease Association	NM_009915.2:2965	Ccr2	mRNA
Mmp12	Mmp12-mRNA	4.66	0.711	3.27	6.06	25.3	9.63	66.5	0.000604	0.0171	lm.nb	Activated Microglia, Matrix Remodeling	NM_008605.3:592	Mmp12	mRNA
Icam1	Icam1-mRNA	4.76	0.251	4.27	5.26	27.2	19.3	38.2	1.39e-06	0.000248	loglinear	Tissue Integrity	NM_010493.2:2195	Icam1	mRNA
Cxcl16	Cxcl16-mRNA	4.8	0.2	4.41	5.19	27.8	21.2	36.5	3.45e-07	9.67e-05	loglinear	Activated Microglia, Cytokines, Disease Association	NM_023158.6:679	Cxcl16	mRNA
Nos2	Nos2-mRNA	4.82	0.415	4.01	5.63	28.2	16.1	49.6	2.44e-05	0.00161	lm.nb	Disease Association, Transmitter Release	NM_010927.3:3715	Nos2	mRNA
Stat1	Stat1-mRNA	4.89	0.15	4.6	5.19	29.7	24.2	36.4	5.5e-08	3.96e-05	lm.nb	Activated Microglia, Angiogenesis, Axon and Dendrite Structure, Growth Factor Signaling	NM_009283.3:1590	Stat1	mRNA
Irf8	Irf8-mRNA	4.96	0.514	3.95	5.97	31.1	15.5	62.6	7.1e-05	0.00323	loglinear	Activated Microglia, Disease Association	NM_008320.3:2274	Irf8	mRNA
Gpr84	Gpr84-mRNA	5.11	0.665	3.81	6.42	34.6	14	85.4	0.000254	0.00871	lm.nb	Activated Microglia	NM_030720.1:315	Gpr84	mRNA
Itgal	Itgal-mRNA	5.21	0.119	4.98	5.44	37.1	31.5	43.6	9.43e-09	9.52e-06	loglinear	Activated Microglia, Tissue Integrity	NM_008400.2:950	Itgal	mRNA
Cd8a	Cd8a-mRNA	5.21	0.891	3.46	6.96	37	11	124	0.0011	0.0263	lm.nb	Tissue Integrity	NM_001081110.2:355	Cd8a	mRNA
Tnf	Tnf-mRNA	5.3	0.0646	5.17	5.42	39.3	36	43	2.21e-10	1.12e-06	loglinear	Activated Microglia, Apoptosis, Cytokines, Disease Association, Growth Factor Signaling, Oxidative Stress	NM_013693.2:514	Tnf	mRNA
Slc11a1	Slc11a1-mRNA	5.48	0.635	4.24	6.73	44.7	18.8	106	0.000134	0.00527	loglinear	Autophagy, Disease Association	NM_013612.2:945	Slc11a1	mRNA
Ccl12	Ccl12-mRNA	5.72	0.428	4.88	6.56	52.6	29.4	94.1	1.1e-05	0.000937	lm.nb	Angiogenesis, Axon and Dendrite Structure, Cytokines, Disease Association, Neural Connectivity, Unfolded Protein Response, Vesicle Trafficking	NM_011331.2:173	Ccl12	mRNA
Psmb8	Psmb8-mRNA	6.02	0.172	5.68	6.35	64.7	51.2	81.8	3.65e-08	3.07e-05	lm.nb	Activated Microglia, Disease Association, Unfolded Protein Response	NM_010724.2:362	Psmb8	mRNA
Psmb9	Psmb9-mRNA	6.04	0.353	5.35	6.73	65.9	40.8	106	2.54e-06	0.000401	loglinear	Activated Microglia, Disease Association, Unfolded Protein Response	NM_013585.2:540	Psmb9	mRNA
Csf2rb	Csf2rb-mRNA	6.15	0.564	5.05	7.26	71.1	33	153	3.54e-05	0.00203	lm.nb	Apoptosis, Cytokines	NM_007780.4:4185	Csf2rb	mRNA
Cybb	Cybb-mRNA	6.32	0.57	5.2	7.43	79.8	36.8	173	3.22e-05	0.00191	loglinear	Activated Microglia, Disease Association, Oxidative Stress	NM_007807.2:1535	Cybb	mRNA
Itgax	Itgax-mRNA	6.58	0.854	4.91	8.25	95.7	30	305	0.00025	0.00871	lm.nb	Activated Microglia	NM_021334.2:327	Itgax	mRNA
Cxcl11	Cxcl11-mRNA	6.59	0.702	5.21	7.97	96.4	37.1	250	8.32e-05	0.00375	loglinear	Cytokines	NM_019494.1:345	Cxcl11	mRNA
C3	C3-mRNA	6.93	0.287	6.37	7.5	122	82.6	180	3.34e-07	9.67e-05	lm.nb	Activated Microglia, Angiogenesis, Disease Association	XM_011246258.1:2702	C3	mRNA
Cxcl10	Cxcl10-mRNA	7.29	0.628	6.06	8.52	157	66.9	368	2.45e-05	0.00161	lm.nb	Activated Microglia, Angiogenesis, Cytokines	NM_021274.1:115	Cxcl10	mRNA
Ccl5	Ccl5-mRNA	9.54	1.06	7.46	11.6	742	176	3120	0.000104	0.00446	loglinear	Activated Microglia, Angiogenesis, Cytokines, Disease Association, Oxidative Stress	NM_013653.1:165	Ccl5	mRNA

## Sheet: CD25 vs Naive
Extended data table NanoString and Single cell analyses. a
		Log2fold change	std error (log2)	Lower confidence limit (log2)	Upper confidence limit (log2)	Linear fold change	Lower confidence limit (linear)	Upper confidence limit (linear)	P-value	BY.p.value	method	Gene.sets	probe.ID
Fcrls	Fcrls-mRNA	-3.83	0.403	-4.62	-3.04	0.0703	0.0407	0.122	7.74e-05	0.00222	loglinear	Activated Microglia	NM_030707.3:925	Fcrls	mRNA		a Differentially genes between CD25 Ab treated mice vs Naïve mice.
Adcyap1	Adcyap1-mRNA	-2.03	0.558	-3.13	-0.94	0.244	0.114	0.521	0.0108	0.121	lm.nb	Axon and Dendrite Structure, Disease Association, Neural Connectivity, Transmitter Synthesis and Storage, Vesicle Trafficking	NM_001315503.1:2625	Adcyap1	mRNA
Npas4	Npas4-mRNA	-2.02	0.277	-2.56	-1.48	0.247	0.169	0.359	0.000338	0.00657	lm.nb	Activated Microglia, Neural Connectivity, Vesicle Trafficking	NM_153553.4:580	Npas4	mRNA
Crh	Crh-mRNA	-1.83	0.531	-2.87	-0.787	0.281	0.137	0.579	0.0138	0.149	lm.nb	Axon and Dendrite Structure, Transmitter Release, Transmitter Response and Reuptake, Vesicle Trafficking	NM_205769.1:1045	Crh	mRNA
Avp	Avp-mRNA	-1.38	0.23	-1.83	-0.933	0.383	0.28	0.524	0.000952	0.015	loglinear	Axon and Dendrite Structure	NM_009732.2:52	Avp	mRNA
Bdnf	Bdnf-mRNA	-1.28	0.184	-1.64	-0.917	0.412	0.321	0.53	0.000447	0.00823	loglinear	Disease Association, Growth Factor Signaling, Transmitter Response and Reuptake, Trophic Factors	NM_007540.4:3260	Bdnf	mRNA
Dcx	Dcx-mRNA	-1.25	0.146	-1.54	-0.964	0.42	0.345	0.513	0.00014	0.0034	loglinear	Axon and Dendrite Structure	NM_010025.2:8575	Dcx	mRNA
Entpd2	Entpd2-mRNA	-1.19	0.356	-1.89	-0.496	0.437	0.27	0.709	0.0153	0.164	lm.nb	Transmitter Response and Reuptake	NM_009849.2:1016	Entpd2	mRNA
Slc18a3	Slc18a3-mRNA	-1.19	0.367	-1.91	-0.474	0.438	0.266	0.72	0.0174	0.183	lm.nb	Neural Connectivity, Transmitter Release, Transmitter Synthesis and Storage, Vesicle Trafficking	NM_021712.2:845	Slc18a3	mRNA
Bche	Bche-mRNA	-1.15	0.181	-1.51	-0.796	0.45	0.352	0.576	0.000718	0.0119	loglinear	Carbohydrate Metabolism, Disease Association, Vesicle Trafficking	NM_009738.3:300	Bche	mRNA
Nwd1	Nwd1-mRNA	-1.14	0.169	-1.47	-0.805	0.455	0.362	0.572	0.000527	0.00934	loglinear		NM_176940.5:3564	Nwd1	mRNA
Th	Th-mRNA	-1.12	0.263	-1.63	-0.604	0.46	0.322	0.658	0.00534	0.0648	lm.nb	Axon and Dendrite Structure, Disease Association, Neural Connectivity, Transmitter Release, Transmitter Synthesis and Storage, Vesicle Trafficking	NM_009377.1:235	Th	mRNA
Grin2c	Grin2c-mRNA	-1.09	0.176	-1.43	-0.744	0.47	0.37	0.597	0.000825	0.0132	loglinear	Disease Association, Neural Connectivity, Transmitter Release, Transmitter Response and Reuptake, Vesicle Trafficking	NM_010350.2:2408	Grin2c	mRNA
Ugt8a	Ugt8a-mRNA	-1.05	0.111	-1.27	-0.835	0.482	0.414	0.56	7.94e-05	0.00226	loglinear	Lipid Metabolism, Myelination	NM_011674.4:138	Ugt8a	mRNA
Hgf	Hgf-mRNA	1.03	0.264	0.515	1.55	2.04	1.43	2.93	0.00784	0.0912	lm.nb	Angiogenesis, Cytokines, Disease Association, Growth Factor Signaling, Myelination, Oxidative Stress	NM_010427.5:483	Hgf	mRNA
Itpr3	Itpr3-mRNA	1.04	0.37	0.311	1.76	2.05	1.24	3.39	0.0311	0.306	loglinear	Apoptosis, Axon and Dendrite Structure, Disease Association, Transmitter Release, Transmitter Response and Reuptake, Vesicle Trafficking	NM_080553.3:3185	Itpr3	mRNA
Bid	Bid-mRNA	1.05	0.0958	0.858	1.23	2.06	1.81	2.35	3.52e-05	0.00127	loglinear	Apoptosis, Disease Association	NM_007544.3:1307	Bid	mRNA
Gba	Gba-mRNA	1.06	0.1	0.865	1.26	2.09	1.82	2.39	4.17e-05	0.00144	loglinear	Activated Microglia, Autophagy, Disease Association, Lipid Metabolism	NM_001077411.1:820	Gba	mRNA
P2rx4	P2rx4-mRNA	1.07	0.0876	0.902	1.25	2.11	1.87	2.37	1.79e-05	0.000847	loglinear	Activated Microglia, Axon and Dendrite Structure, Neural Connectivity, Transmitter Release, Transmitter Response and Reuptake	NM_011026.2:1655	P2rx4	mRNA
Rela	Rela-mRNA	1.09	0.0965	0.902	1.28	2.13	1.87	2.43	2.88e-05	0.00112	loglinear	Apoptosis, Disease Association, Growth Factor Signaling, Oxidative Stress, Transmitter Response and Reuptake, Trophic Factors	NM_009045.4:645	Rela	mRNA
Fn1	Fn1-mRNA	1.09	0.13	0.835	1.35	2.13	1.78	2.54	0.000159	0.00378	loglinear	Activated Microglia, Angiogenesis, Disease Association, Oxidative Stress	NM_010233.1:2627	Fn1	mRNA
Atp7a	Atp7a-mRNA	1.11	0.0497	1.01	1.21	2.16	2.02	2.31	5.26e-07	0.000111	loglinear	Oxidative Stress, Transmitter Synthesis and Storage	NM_001109757.2:1200	Atp7a	mRNA
Mmrn2	Mmrn2-mRNA	1.11	0.116	0.887	1.34	2.16	1.85	2.53	7.35e-05	0.00218	loglinear	Angiogenesis	NM_153127.3:2622	Mmrn2	mRNA
Plekho2	Plekho2-mRNA	1.14	0.065	1.01	1.27	2.2	2.02	2.41	2.22e-06	0.000233	loglinear	Cytokines	NM_153119.2:406	Plekho2	mRNA
Slc2a1	Slc2a1-mRNA	1.16	0.106	0.954	1.37	2.24	1.94	2.59	3.45e-05	0.00127	loglinear	Activated Microglia, Disease Association, Tissue Integrity	NM_011400.3:2190	Slc2a1	mRNA
Eng	Eng-mRNA	1.17	0.151	0.877	1.47	2.25	1.84	2.77	0.000238	0.00502	lm.nb	Angiogenesis	NM_001146350.1:574	Eng	mRNA
Acvrl1	Acvrl1-mRNA	1.17	0.28	0.62	1.72	2.25	1.54	3.29	0.00584	0.07	lm.nb	Angiogenesis, Axon and Dendrite Structure, Disease Association	NM_009612.2:2985	Acvrl1	mRNA
Lox	Lox-mRNA	1.2	0.488	0.244	2.16	2.3	1.18	4.46	0.0491	0.466	lm.nb	Activated Microglia	NM_010728.2:2300	Lox	mRNA
Atp6v0e	Atp6v0e-mRNA	1.21	0.0583	1.1	1.33	2.32	2.14	2.51	8.05e-07	0.000133	loglinear	Activated Microglia, Transmitter Synthesis and Storage	NM_025272.2:585	Atp6v0e	mRNA
Npc2	Npc2-mRNA	1.21	0.203	0.812	1.61	2.31	1.76	3.05	0.000998	0.0156	lm.nb	Activated Microglia, Autophagy, Disease Association	NM_023409.4:3095	Npc2	mRNA
Cdk2	Cdk2-mRNA	1.26	0.196	0.879	1.65	2.4	1.84	3.13	0.000662	0.0112	loglinear	Chromatin Modification, Disease Association, Oxidative Stress	NM_016756.4:831	Cdk2	mRNA
Cx3cr1	Cx3cr1-mRNA	1.29	0.0824	1.13	1.46	2.45	2.19	2.74	4.21e-06	0.000332	loglinear	Activated Microglia, Angiogenesis, Cytokines, Vesicle Trafficking	NM_009987.3:2696	Cx3cr1	mRNA
Mapkapk2	Mapkapk2-mRNA	1.3	0.109	1.09	1.52	2.47	2.13	2.86	2.02e-05	0.000921	loglinear	Growth Factor Signaling, Trophic Factors	NM_008551.1:1991	Mapkapk2	mRNA
Mmp2	Mmp2-mRNA	1.33	0.162	1.01	1.65	2.51	2.01	3.13	0.00018	0.00414	loglinear	Angiogenesis, Disease Association, Matrix Remodeling	NM_008610.2:2376	Mmp2	mRNA
Pecam1	Pecam1-mRNA	1.33	0.164	1.01	1.65	2.52	2.01	3.15	0.000188	0.00422	lm.nb	Disease Association, Tissue Integrity	NM_008816.2:1100	Pecam1	mRNA
Fgf2	Fgf2-mRNA	1.38	0.207	0.975	1.79	2.6	1.97	3.45	0.000548	0.0096	lm.nb	Angiogenesis, Growth Factor Signaling	NM_008006.2:509	Fgf2	mRNA
Myc	Myc-mRNA	1.38	0.222	0.945	1.82	2.61	1.93	3.52	0.000804	0.013	loglinear	Disease Association, Growth Factor Signaling	NM_010849.4:630	Myc	mRNA
Cd9	Cd9-mRNA	1.4	0.0551	1.29	1.51	2.64	2.45	2.84	2.44e-07	5.87e-05	loglinear	Activated Microglia, Disease Association, Myelination	NM_007657.3:620	Cd9	mRNA
Stab1	Stab1-mRNA	1.41	0.11	1.19	1.62	2.65	2.28	3.07	1.38e-05	0.000697	loglinear	Angiogenesis, Disease Association	NM_138672.2:5890	Stab1	mRNA
Pla2g16	Pla2g16-mRNA	1.42	0.0685	1.29	1.56	2.68	2.44	2.94	8.17e-07	0.000133	loglinear	Growth Factor Signaling, Lipid Metabolism	NM_139269.2:568	Pla2g16	mRNA
Naglu	Naglu-mRNA	1.43	0.0946	1.25	1.62	2.7	2.38	3.07	5.18e-06	0.000377	loglinear	Activated Microglia, Autophagy	NM_013792.2:2334	Naglu	mRNA
Il1r1	Il1r1-mRNA	1.46	0.122	1.22	1.7	2.76	2.34	3.26	2.08e-05	0.000924	loglinear	Activated Microglia, Axon and Dendrite Structure, Cytokines, Disease Association, Growth Factor Signaling, Neural Connectivity, Oxidative Stress	NM_001123382.1:820	Il1r1	mRNA
Cdkn1a	Cdkn1a-mRNA	1.48	0.136	1.22	1.75	2.79	2.32	3.36	3.5e-05	0.00127	loglinear	Apoptosis, Disease Association	NM_007669.4:1670	Cdkn1a	mRNA
Sgpl1	Sgpl1-mRNA	1.49	0.104	1.28	1.69	2.8	2.43	3.22	7.18e-06	0.000442	loglinear	Lipid Metabolism	NM_009163.3:1200	Sgpl1	mRNA
Scamp2	Scamp2-mRNA	1.51	0.0848	1.34	1.67	2.84	2.53	3.19	2.05e-06	0.000233	loglinear	Activated Microglia	NM_022813.3:526	Scamp2	mRNA
Rras	Rras-mRNA	1.51	0.112	1.29	1.72	2.84	2.44	3.3	1.03e-05	0.00057	loglinear	Angiogenesis, Growth Factor Signaling, Transmitter Response and Reuptake	NM_009101.2:282	Rras	mRNA
Pfn1	Pfn1-mRNA	1.52	0.102	1.32	1.72	2.88	2.5	3.31	5.8e-06	0.000396	loglinear	Neural Connectivity, Neuronal Cytoskeleton	NM_011072.4:266	Pfn1	mRNA
Ang	Ang-mRNA	1.57	0.446	0.694	2.44	2.97	1.62	5.44	0.0126	0.137	lm.nb	Angiogenesis, Disease Association	NM_007447.2:425	Ang	mRNA
Man2b1	Man2b1-mRNA	1.64	0.0994	1.45	1.84	3.12	2.73	3.58	3.12e-06	0.000278	loglinear	Autophagy	NM_010764.2:1658	Man2b1	mRNA
Icam2	Icam2-mRNA	1.71	0.143	1.43	1.99	3.27	2.69	3.97	2.11e-05	0.000924	loglinear	Disease Association, Tissue Integrity	NM_010494.1:375	Icam2	mRNA
Lsr	Lsr-mRNA	1.74	0.162	1.42	2.06	3.34	2.68	4.16	3.9e-05	0.00136	loglinear	Lipid Metabolism	NM_001164184.1:445	Lsr	mRNA
Ltbr	Ltbr-mRNA	1.74	0.2	1.35	2.13	3.34	2.55	4.38	0.000126	0.00319	lm.nb	Cytokines, Disease Association	NM_010736.3:1962	Ltbr	mRNA
P2rx7	P2rx7-mRNA	1.75	0.0907	1.57	1.93	3.36	2.97	3.8	1.25e-06	0.000166	loglinear	Disease Association, Neural Connectivity, Transmitter Release, Transmitter Response and Reuptake, Vesicle Trafficking	NM_001038839.2:378	P2rx7	mRNA
Csf1	Csf1-mRNA	1.81	0.0656	1.68	1.94	3.51	3.21	3.83	1.5e-07	4.65e-05	loglinear	Activated Microglia, Cytokines	NM_001113530.1:833	Csf1	mRNA
Gusb	Gusb-mRNA	1.85	0.117	1.62	2.08	3.61	3.08	4.23	4.04e-06	0.000327	loglinear	Activated Microglia, Autophagy	NM_010368.1:1735	Gusb	mRNA
Hpgds	Hpgds-mRNA	1.93	0.15	1.64	2.23	3.82	3.12	4.69	1.35e-05	0.000695	loglinear	Lipid Metabolism	NM_019455.4:194	Hpgds	mRNA
Tgfbr2	Tgfbr2-mRNA	1.96	0.077	1.81	2.11	3.89	3.5	4.32	2.42e-07	5.87e-05	loglinear	Angiogenesis, Cytokines, Growth Factor Signaling	NM_009371.2:475	Tgfbr2	mRNA
Pla2g4a	Pla2g4a-mRNA	1.99	0.139	1.72	2.27	3.98	3.3	4.81	7.04e-06	0.000439	loglinear	Disease Association, Growth Factor Signaling, Lipid Metabolism, Oxidative Stress, Transmitter Release, Transmitter Response and Reuptake	NM_008869.2:1525	Pla2g4a	mRNA
Csf1r	Csf1r-mRNA	2.01	0.0627	1.88	2.13	4.01	3.69	4.37	6.22e-08	2.85e-05	loglinear	Activated Microglia, Cytokines, Disease Association, Growth Factor Signaling	NM_001037859.1:3655	Csf1r	mRNA
Il6ra	Il6ra-mRNA	2.03	0.111	1.81	2.24	4.08	3.51	4.74	1.71e-06	0.000215	loglinear	Activated Microglia, Cytokines	NM_010559.2:2825	Il6ra	mRNA
Hexb	Hexb-mRNA	2.05	0.0618	1.93	2.17	4.14	3.81	4.5	4.99e-08	2.8e-05	loglinear	Autophagy, Disease Association, Myelination	NM_010422.2:805	Hexb	mRNA
Mmp14	Mmp14-mRNA	2.06	0.0999	1.86	2.26	4.17	3.64	4.78	8.47e-07	0.000134	loglinear	Activated Microglia, Angiogenesis, Disease Association, Matrix Remodeling, Oxidative Stress	NM_008608.3:554	Mmp14	mRNA
Nfkbia	Nfkbia-mRNA	2.08	0.0828	1.92	2.24	4.22	3.77	4.72	2.64e-07	5.89e-05	loglinear	Apoptosis, Disease Association, Transmitter Response and Reuptake, Trophic Factors	NM_010907.2:646	Nfkbia	mRNA
Tmem119	Tmem119-mRNA	2.09	0.15	1.79	2.38	4.25	3.47	5.21	8.59e-06	0.000504	loglinear	Activated Microglia, Disease Association	NM_146162.2:1550	Tmem119	mRNA
Ptgs2	Ptgs2-mRNA	2.11	0.158	1.8	2.42	4.31	3.48	5.35	1.1e-05	0.000603	lm.nb	Activated Microglia, Angiogenesis, Disease Association, Lipid Metabolism, Oxidative Stress, Transmitter Release, Transmitter Response and Reuptake, Vesicle Trafficking	NM_011198.3:675	Ptgs2	mRNA
Cd4	Cd4-mRNA	2.11	0.256	1.61	2.61	4.32	3.05	6.12	0.000172	0.00398	lm.nb	Disease Association, Tissue Integrity	NM_013488.2:950	Cd4	mRNA
Il4ra	Il4ra-mRNA	2.12	0.127	1.87	2.37	4.35	3.66	5.16	2.91e-06	0.00027	loglinear	Cytokines, Disease Association	NM_001008700.3:2908	Il4ra	mRNA
Stat3	Stat3-mRNA	2.14	0.1	1.94	2.34	4.41	3.84	5.05	6.95e-07	0.000121	loglinear	Disease Association, Growth Factor Signaling	NM_213659.2:1360	Stat3	mRNA
Nfe2l2	Nfe2l2-mRNA	2.19	0.121	1.96	2.43	4.58	3.88	5.4	1.82e-06	0.000219	loglinear	Oxidative Stress, Unfolded Protein Response	NR_132727.1:193	Nfe2l2	mRNA
Il13ra1	Il13ra1-mRNA	2.2	0.175	1.85	2.54	4.58	3.61	5.82	1.57e-05	0.000766	loglinear	Cytokines, Disease Association	NM_133990.4:845	Il13ra1	mRNA
Trem2	Trem2-mRNA	2.24	0.0518	2.14	2.35	4.74	4.41	5.08	1.01e-08	8.52e-06	loglinear	Activated Microglia, Disease Association	NM_031254.2:646	Trem2	mRNA
Myd88	Myd88-mRNA	2.25	0.178	1.9	2.6	4.76	3.74	6.07	1.5e-05	0.00074	lm.nb	Disease Association, Neural Connectivity	NM_010851.2:1595	Myd88	mRNA
Fas	Fas-mRNA	2.32	0.252	1.83	2.82	5.01	3.55	7.05	9.19e-05	0.00251	loglinear	Apoptosis, Axon and Dendrite Structure, Cytokines, Disease Association, Growth Factor Signaling, Oxidative Stress	NM_007987.2:84	Fas	mRNA
Casp7	Casp7-mRNA	2.42	0.122	2.18	2.66	5.36	4.54	6.32	1.05e-06	0.000144	loglinear	Apoptosis, Disease Association	NM_007611.2:1468	Casp7	mRNA
Itga5	Itga5-mRNA	2.42	0.354	1.73	3.12	5.36	3.31	8.66	0.000477	0.00863	lm.nb	Activated Microglia, Angiogenesis, Disease Association, Neural Connectivity	NM_001314041.1:2622	Itga5	mRNA
Angpt2	Angpt2-mRNA	2.43	0.638	1.18	3.68	5.38	2.26	12.8	0.00892	0.102	lm.nb	Angiogenesis, Disease Association	NM_007426.3:2020	Angpt2	mRNA
Cd33	Cd33-mRNA	2.44	0.112	2.22	2.66	5.43	4.66	6.32	6.05e-07	0.000118	loglinear	Activated Microglia, Disease Association	NM_001111058.1:405	Cd33	mRNA
Nlrp3	Nlrp3-mRNA	2.5	0.168	2.17	2.83	5.65	4.5	7.09	5.81e-06	0.000396	loglinear	Activated Microglia, Disease Association	NM_145827.3:508	Nlrp3	mRNA
Mmp19	Mmp19-mRNA	2.53	0.395	1.76	3.31	5.79	3.39	9.91	0.000678	0.0113	lm.nb	Angiogenesis, Matrix Remodeling	NM_021412.2:1140	Mmp19	mRNA
Tnfrsf1a	Tnfrsf1a-mRNA	2.57	0.103	2.36	2.77	5.92	5.15	6.8	2.68e-07	5.89e-05	loglinear	Apoptosis, Cytokines, Disease Association, Growth Factor Signaling	NM_011609.2:615	Tnfrsf1a	mRNA
Il15ra	Il15ra-mRNA	2.63	0.33	1.98	3.27	6.17	3.94	9.67	0.00021	0.00457	loglinear	Cytokines, Disease Association	NM_008358.2:800	Il15ra	mRNA
Grn	Grn-mRNA	2.67	0.0965	2.48	2.86	6.38	5.6	7.27	1.46e-07	4.65e-05	loglinear	Activated Microglia, Disease Association	NM_008175.3:2010	Grn	mRNA
Itgam	Itgam-mRNA	2.67	0.198	2.28	3.06	6.37	4.87	8.34	1.03e-05	0.00057	lm.nb	Disease Association, Tissue Integrity	NM_008401.2:155	Itgam	mRNA
Tcirg1	Tcirg1-mRNA	2.7	0.155	2.4	3	6.49	5.26	8.01	2.26e-06	0.000233	loglinear	Autophagy, Disease Association, Transmitter Synthesis and Storage	NM_001136091.1:1345	Tcirg1	mRNA
C4a	C4a-mRNA	2.7	0.19	2.33	3.08	6.52	5.04	8.43	7.44e-06	0.000452	loglinear	Activated Microglia, Angiogenesis, Disease Association	NM_011413.2:4186	C4a	mRNA
Osmr	Osmr-mRNA	2.71	0.208	2.3	3.11	6.52	4.92	8.66	1.28e-05	0.000672	loglinear	Cytokines, Disease Association	NM_011019.3:395	Osmr	mRNA
Tgfb1	Tgfb1-mRNA	2.79	0.0946	2.61	2.98	6.93	6.09	7.87	1e-07	3.61e-05	loglinear	Activated Microglia, Axon and Dendrite Structure, Chromatin Modification, Cytokines, Growth Factor Signaling, Myelination	NM_011577.1:1470	Tgfb1	mRNA
Cp	Cp-mRNA	2.83	0.158	2.52	3.14	7.09	5.72	8.79	2e-06	0.000233	lm.nb	Disease Association	NM_001042611.1:1750	Cp	mRNA
Msn	Msn-mRNA	2.88	0.134	2.62	3.15	7.38	6.15	8.85	6.67e-07	0.00012	loglinear	Disease Association, Neuronal Cytoskeleton	NM_010833.2:515	Msn	mRNA
Il10ra	Il10ra-mRNA	2.91	0.113	2.69	3.14	7.54	6.47	8.79	2.21e-07	5.86e-05	loglinear	Cytokines, Disease Association	NM_008348.2:2522	Il10ra	mRNA
Gfap	Gfap-mRNA	2.91	0.143	2.63	3.19	7.49	6.18	9.1	9.04e-07	0.000138	lm.nb	Disease Association, Neuronal Cytoskeleton, Vesicle Trafficking	NM_001131020.1:610	Gfap	mRNA
Cxcr4	Cxcr4-mRNA	2.92	0.378	2.18	3.66	7.57	4.53	12.7	0.000247	0.0052	lm.nb	Activated Microglia, Cytokines, Disease Association, Myelination	NM_009911.3:704	Cxcr4	mRNA
Casp8	Casp8-mRNA	2.93	0.178	2.59	3.28	7.64	6	9.73	3.14e-06	0.000278	loglinear	Activated Microglia, Apoptosis, Disease Association	NM_009812.2:1463	Casp8	mRNA
Tlr4	Tlr4-mRNA	2.94	0.235	2.48	3.4	7.68	5.58	10.6	1.58e-05	0.000766	loglinear	Apoptosis, Disease Association	NM_021297.2:2510	Tlr4	mRNA
Lrrc25	Lrrc25-mRNA	3.09	0.238	2.63	3.56	8.52	6.17	11.8	1.27e-05	0.000672	loglinear		NM_153074.3:246	Lrrc25	mRNA
Ccr5	Ccr5-mRNA	3.19	0.218	2.76	3.62	9.14	6.8	12.3	6.42e-06	0.000421	lm.nb	Activated Microglia, Cytokines, Disease Association	NM_009917.5:1340	Ccr5	mRNA
Sp100	Sp100-mRNA	3.38	0.113	3.16	3.6	10.4	8.91	12.1	9.45e-08	3.61e-05	loglinear	Angiogenesis	NM_013673.3:410	Sp100	mRNA
Cd44	Cd44-mRNA	3.49	0.204	3.09	3.89	11.3	8.54	14.9	2.56e-06	0.000248	lm.nb	Activated Microglia, Disease Association	NM_009851.2:3075	Cd44	mRNA
Spi1	Spi1-mRNA	3.52	0.159	3.21	3.83	11.5	9.25	14.2	5.54e-07	0.000112	loglinear	Chromatin Modification	NM_011355.1:200	Spi1	mRNA
Cd68	Cd68-mRNA	3.52	0.201	3.12	3.91	11.4	8.71	15	2.27e-06	0.000233	lm.nb	Activated Microglia, Autophagy, Disease Association	NM_009853.1:636	Cd68	mRNA
Marco	Marco-mRNA	3.52	0.626	2.29	4.75	11.5	4.9	26.9	0.00135	0.02	loglinear	Activated Microglia	NM_010766.2:350	Marco	mRNA
Fasl	Fasl-mRNA	3.55	0.611	2.36	4.75	11.7	5.12	27	0.00113	0.0172	lm.nb	Angiogenesis, Apoptosis, Cytokines, Growth Factor Signaling, Trophic Factors	NM_010177.3:645	Fasl	mRNA
Ncf1	Ncf1-mRNA	3.58	0.229	3.13	4.03	11.9	8.75	16.3	4.34e-06	0.000333	loglinear	Oxidative Stress	NM_001286037.1:970	Ncf1	mRNA
C1qb	C1qb-mRNA	3.6	0.0508	3.5	3.7	12.1	11.3	13	5.3e-10	8.92e-07	loglinear	Activated Microglia, Angiogenesis, Disease Association	NM_009777.2:865	C1qb	mRNA
C1qc	C1qc-mRNA	3.64	0.0745	3.5	3.79	12.5	11.3	13.8	4.89e-09	4.94e-06	loglinear	Activated Microglia, Angiogenesis, Disease Association	NM_007574.2:708	C1qc	mRNA
Tspo	Tspo-mRNA	3.71	0.245	3.23	4.19	13.1	9.36	18.2	5.3e-06	0.000377	lm.nb	Disease Association, Neural Connectivity, Transmitter Response and Reuptake, Vesicle Trafficking	NM_009775.4:241	Tspo	mRNA
Plcb2	Plcb2-mRNA	3.82	0.735	2.38	5.26	14.1	5.21	38.4	0.00202	0.0282	loglinear	Disease Association, Growth Factor Signaling, Transmitter Release, Transmitter Response and Reuptake	NM_177568.2:4335	Plcb2	mRNA
C1qa	C1qa-mRNA	4.07	0.0555	3.96	4.18	16.8	15.6	18.1	4.34e-10	8.92e-07	loglinear	Activated Microglia, Angiogenesis, Disease Association	NM_007572.2:566	C1qa	mRNA
Napsa	Napsa-mRNA	4.08	0.606	2.89	5.26	16.9	7.4	38.4	0.000524	0.00931	lm.nb	Autophagy	NM_008437.1:1144	Napsa	mRNA
Hmox1	Hmox1-mRNA	4.12	0.301	3.53	4.71	17.4	11.6	26.2	9.32e-06	0.000535	lm.nb	Angiogenesis, Disease Association, Oxidative Stress	NM_010442.2:610	Hmox1	mRNA
Casp1	Casp1-mRNA	4.2	0.257	3.69	4.7	18.3	12.9	26	3.33e-06	0.000285	lm.nb	Apoptosis, Disease Association	NM_009807.2:259	Casp1	mRNA
Tnfrsf1b	Tnfrsf1b-mRNA	4.34	0.299	3.75	4.92	20.3	13.5	30.4	6.64e-06	0.000424	lm.nb	Axon and Dendrite Structure, Cytokines, Disease Association	NM_011610.3:3270	Tnfrsf1b	mRNA
Tlr2	Tlr2-mRNA	4.61	0.128	4.36	4.86	24.4	20.5	29	3.04e-08	2.19e-05	loglinear	Activated Microglia, Disease Association	NM_011905.2:255	Tlr2	mRNA
Cd40	Cd40-mRNA	4.64	0.389	3.88	5.4	24.9	14.7	42.2	2.1e-05	0.000924	lm.nb	Cytokines, Tissue Integrity	NM_011611.2:1425	Cd40	mRNA
Il1b	Il1b-mRNA	4.82	0.332	4.17	5.47	28.2	17.9	44.3	6.76e-06	0.000426	lm.nb	Activated Microglia, Angiogenesis, Chromatin Modification, Cytokines, Disease Association, Growth Factor Signaling, Oxidative Stress	NM_008361.3:1120	Il1b	mRNA
Stat1	Stat1-mRNA	4.86	0.15	4.57	5.16	29.1	23.8	35.7	5.7e-08	2.85e-05	lm.nb	Activated Microglia, Angiogenesis, Axon and Dendrite Structure, Growth Factor Signaling	NM_009283.3:1590	Stat1	mRNA
Irf8	Irf8-mRNA	4.94	0.514	3.93	5.94	30.6	15.2	61.6	7.29e-05	0.00218	loglinear	Activated Microglia, Disease Association	NM_008320.3:2274	Irf8	mRNA
Cd14	Cd14-mRNA	4.96	0.647	3.69	6.23	31.2	12.9	75.1	0.000258	0.00533	loglinear	Disease Association, Growth Factor Signaling	NM_009841.3:235	Cd14	mRNA
Icam1	Icam1-mRNA	4.99	0.251	4.5	5.49	31.9	22.7	44.9	1.05e-06	0.000144	loglinear	Tissue Integrity	NM_010493.2:2195	Icam1	mRNA
Ccl12	Ccl12-mRNA	5.06	0.429	4.22	5.9	33.4	18.6	59.7	2.24e-05	0.00095	lm.nb	Angiogenesis, Axon and Dendrite Structure, Cytokines, Disease Association, Neural Connectivity, Unfolded Protein Response, Vesicle Trafficking	NM_011331.2:173	Ccl12	mRNA
Ccr2	Ccr2-mRNA	5.17	0.365	4.46	5.89	36	21.9	59.2	7.75e-06	0.000466	lm.nb	Activated Microglia, Angiogenesis, Axon and Dendrite Structure, Cytokines, Disease Association	NM_009915.2:2965	Ccr2	mRNA
Cxcl16	Cxcl16-mRNA	5.48	0.2	5.09	5.87	44.6	34	58.5	1.57e-07	4.65e-05	loglinear	Activated Microglia, Cytokines, Disease Association	NM_023158.6:679	Cxcl16	mRNA
Mmp12	Mmp12-mRNA	5.69	0.71	4.3	7.08	51.7	19.7	136	2e-04	0.00446	lm.nb	Activated Microglia, Matrix Remodeling	NM_008605.3:592	Mmp12	mRNA
Itgal	Itgal-mRNA	5.86	0.119	5.63	6.09	58.1	49.5	68.3	4.67e-09	4.94e-06	loglinear	Activated Microglia, Tissue Integrity	NM_008400.2:950	Itgal	mRNA
Cd8a	Cd8a-mRNA	5.9	0.887	4.16	7.64	59.7	17.9	199	0.000558	0.00975	lm.nb	Tissue Integrity	NM_001081110.2:355	Cd8a	mRNA
Gpr84	Gpr84-mRNA	6.02	0.661	4.73	7.32	65	26.5	160	9.81e-05	0.00265	lm.nb	Activated Microglia	NM_030720.1:315	Gpr84	mRNA
Nos2	Nos2-mRNA	6.04	0.412	5.23	6.84	65.7	37.6	115	6.3e-06	0.000421	lm.nb	Disease Association, Transmitter Release	NM_010927.3:3715	Nos2	mRNA
Psmb8	Psmb8-mRNA	6.05	0.172	5.71	6.38	66	52.3	83.4	3.55e-08	2.24e-05	lm.nb	Activated Microglia, Disease Association, Unfolded Protein Response	NM_010724.2:362	Psmb8	mRNA
Psmb9	Psmb9-mRNA	6.05	0.353	5.36	6.74	66.1	40.9	107	2.53e-06	0.000248	loglinear	Activated Microglia, Disease Association, Unfolded Protein Response	NM_013585.2:540	Psmb9	mRNA
Slc11a1	Slc11a1-mRNA	6.07	0.635	4.82	7.31	67	28.3	159	7.54e-05	0.00221	loglinear	Autophagy, Disease Association	NM_013612.2:945	Slc11a1	mRNA
Tnf	Tnf-mRNA	6.12	0.0646	6	6.25	69.7	63.9	76.1	9.29e-11	4.69e-07	loglinear	Activated Microglia, Apoptosis, Cytokines, Disease Association, Growth Factor Signaling, Oxidative Stress	NM_013693.2:514	Tnf	mRNA
Cxcl11	Cxcl11-mRNA	6.17	0.702	4.8	7.55	72.2	27.8	188	0.00012	0.00305	loglinear	Cytokines	NM_019494.1:345	Cxcl11	mRNA
Csf2rb	Csf2rb-mRNA	6.58	0.564	5.47	7.68	95.4	44.4	205	2.39e-05	0.000987	lm.nb	Apoptosis, Cytokines	NM_007780.4:4185	Csf2rb	mRNA
Cybb	Cybb-mRNA	7.01	0.57	5.9	8.13	129	59.5	280	1.76e-05	0.000838	loglinear	Activated Microglia, Disease Association, Oxidative Stress	NM_007807.2:1535	Cybb	mRNA
Cxcl10	Cxcl10-mRNA	7.24	0.628	6.01	8.47	151	64.5	356	2.55e-05	0.00102	lm.nb	Activated Microglia, Angiogenesis, Cytokines	NM_021274.1:115	Cxcl10	mRNA
Itgax	Itgax-mRNA	7.25	0.852	5.58	8.92	152	47.7	484	0.000145	0.0035	lm.nb	Activated Microglia	NM_021334.2:327	Itgax	mRNA
C3	C3-mRNA	7.76	0.287	7.19	8.32	216	146	319	1.7e-07	4.78e-05	lm.nb	Activated Microglia, Angiogenesis, Disease Association	XM_011246258.1:2702	C3	mRNA
Ccl5	Ccl5-mRNA	10.9	1.06	8.8	12.9	1870	445	7870	4.95e-05	0.00163	loglinear	Activated Microglia, Angiogenesis, Cytokines, Disease Association, Oxidative Stress	NM_013653.1:165	Ccl5	mRNA

## Sheet: PPI
Extended data table NanoString and Single cell analyses. a
#node1	node2	node1_string_id	node2_string_id	neighborhood_on_chromosome	gene_fusion	phylogenetic_cooccurrence	homology	coexpression	experimentally_determined_interaction	database_annotated	automated_textmining	combined_score
ACVRL1	TGFB1	9606.ENSP00000373574	9606.ENSP00000221930	0	0	0	0	0.048	0.658	0	0.883	0.958		a Protein interactions from StringDB.
ACVRL1	FGF2	9606.ENSP00000373574	9606.ENSP00000264498	0	0	0	0	0.055	0	0	0.528	0.535
ACVRL1	ITGA5	9606.ENSP00000373574	9606.ENSP00000293379	0	0	0	0	0.079	0.31	0	0.146	0.411
ACVRL1	CXCL11	9606.ENSP00000373574	9606.ENSP00000306884	0	0	0	0	0.058	0	0	0.448	0.457
ACVRL1	ANGPT2	9606.ENSP00000373574	9606.ENSP00000314897	0	0	0	0	0.101	0.046	0	0.368	0.41
ACVRL1	TGFBR2	9606.ENSP00000373574	9606.ENSP00000351905	0	0	0	0.751	0.155	0.528	0.8	0.916	0.992
ACVRL1	ENG	9606.ENSP00000373574	9606.ENSP00000362299	0	0	0	0	0.274	0.738	0	0.997	0.999
ACVRL1	SLC18A3	9606.ENSP00000373574	9606.ENSP00000363229	0	0	0	0	0	0	0	0.497	0.497
ACVRL1	PECAM1	9606.ENSP00000373574	9606.ENSP00000457421	0	0	0	0	0.178	0.081	0	0.328	0.448
ADCYAP1	FGF2	9606.ENSP00000462647	9606.ENSP00000264498	0	0	0	0	0.055	0	0	0.462	0.469
ADCYAP1	CRH	9606.ENSP00000462647	9606.ENSP00000276571	0	0	0	0	0.133	0	0.4	0.636	0.794
ADCYAP1	AVP	9606.ENSP00000462647	9606.ENSP00000369647	0	0	0	0	0.088	0	0.4	0.245	0.55
ADCYAP1	TH	9606.ENSP00000462647	9606.ENSP00000370571	0	0	0	0	0.103	0	0	0.483	0.517
ADCYAP1	BDNF	9606.ENSP00000462647	9606.ENSP00000414303	0	0	0	0	0	0	0	0.595	0.595
ANG	TGFB1	9606.ENSP00000336762	9606.ENSP00000221930	0	0	0	0	0	0	0	0.474	0.474
ANG	HGF	9606.ENSP00000336762	9606.ENSP00000222390	0	0	0	0	0.044	0	0	0.418	0.419
ANG	FGF2	9606.ENSP00000336762	9606.ENSP00000264498	0	0	0	0	0	0	0	0.581	0.581
ANG	ANGPT2	9606.ENSP00000336762	9606.ENSP00000314897	0	0	0	0	0	0	0	0.479	0.479
ANG	ENG	9606.ENSP00000336762	9606.ENSP00000362299	0	0	0	0	0.062	0.127	0	0.37	0.439
ANG	PECAM1	9606.ENSP00000336762	9606.ENSP00000457421	0	0	0	0	0.047	0	0	0.549	0.551
ANG	CCL5	9606.ENSP00000336762	9606.ENSP00000474412	0	0	0	0	0	0	0	0.582	0.582
ANGPT2	MMP2	9606.ENSP00000314897	9606.ENSP00000219070	0	0	0	0	0.049	0	0	0.603	0.606
ANGPT2	TGFB1	9606.ENSP00000314897	9606.ENSP00000221930	0	0	0	0	0	0	0	0.512	0.512
ANGPT2	HGF	9606.ENSP00000314897	9606.ENSP00000222390	0	0	0	0	0.042	0	0	0.711	0.711
ANGPT2	FLT4	9606.ENSP00000314897	9606.ENSP00000261937	0	0	0	0	0.084	0.115	0.65	0.938	0.98
ANGPT2	IL1B	9606.ENSP00000314897	9606.ENSP00000263341	0	0	0	0	0	0	0	0.689	0.689
ANGPT2	FGF2	9606.ENSP00000314897	9606.ENSP00000264498	0	0	0	0	0	0	0	0.83	0.83
ANGPT2	ICAM1	9606.ENSP00000314897	9606.ENSP00000264832	0	0	0	0	0.042	0	0	0.599	0.6
ANGPT2	CSF1R	9606.ENSP00000314897	9606.ENSP00000286301	0	0	0	0	0.119	0.115	0.65	0.372	0.806
ANGPT2	ITGA5	9606.ENSP00000314897	9606.ENSP00000293379	0	0	0	0	0.056	0.51	0	0.278	0.636
ANGPT2	CXCL10	9606.ENSP00000314897	9606.ENSP00000305651	0	0	0	0	0.064	0	0	0.4	0.414
ANGPT2	CCL5	9606.ENSP00000314897	9606.ENSP00000474412	0	0	0	0	0.053	0	0	0.394	0.401
ANGPT2	PTGS2	9606.ENSP00000314897	9606.ENSP00000356438	0	0	0	0	0.047	0	0	0.458	0.462
ANGPT2	FN1	9606.ENSP00000314897	9606.ENSP00000346839	0	0	0	0	0.054	0	0	0.48	0.487
ANGPT2	CXCR4	9606.ENSP00000314897	9606.ENSP00000386884	0	0	0	0	0.068	0	0	0.492	0.506
ANGPT2	MYC	9606.ENSP00000314897	9606.ENSP00000478887	0	0	0	0	0	0	0	0.551	0.551
ANGPT2	TNF	9606.ENSP00000314897	9606.ENSP00000398698	0	0	0	0	0.05	0	0	0.571	0.575
ANGPT2	BDNF	9606.ENSP00000314897	9606.ENSP00000414303	0	0	0	0	0	0	0	0.578	0.578
ANGPT2	PECAM1	9606.ENSP00000314897	9606.ENSP00000457421	0	0	0	0	0.178	0	0	0.656	0.705
ANGPT2	ENG	9606.ENSP00000314897	9606.ENSP00000362299	0	0	0	0	0.06	0	0	0.699	0.705
ATP6V0E1	TCIRG1	9606.ENSP00000429690	9606.ENSP00000265686	0	0	0	0	0.06	0.516	0.5	0.362	0.835
ATP7A	LOX	9606.ENSP00000345728	9606.ENSP00000231004	0	0	0	0	0	0.201	0	0.505	0.588
ATP7A	SLC11A1	9606.ENSP00000345728	9606.ENSP00000233202	0.052	0	0	0	0.103	0.073	0	0.436	0.496
ATP7A	IL1B	9606.ENSP00000345728	9606.ENSP00000263341	0	0	0	0	0	0	0	0.419	0.418
ATP7A	CP	9606.ENSP00000345728	9606.ENSP00000264613	0.079	0	0	0	0.184	0	0.253	0.904	0.939
ATP7A	CRH	9606.ENSP00000345728	9606.ENSP00000276571	0	0	0	0	0	0	0	0.494	0.493
ATP7A	BDNF	9606.ENSP00000345728	9606.ENSP00000414303	0	0	0	0	0	0	0	0.438	0.438
ATP7A	MAPKAPK2	9606.ENSP00000345728	9606.ENSP00000356070	0	0	0	0	0.049	0	0	0.487	0.491
ATP7A	TNF	9606.ENSP00000345728	9606.ENSP00000398698	0	0	0	0	0	0	0	0.505	0.505
ATP7A	FN1	9606.ENSP00000345728	9606.ENSP00000346839	0	0	0	0	0.059	0	0	0.528	0.536
AVP	PLCB2	9606.ENSP00000369647	9606.ENSP00000260402	0	0	0	0	0	0	0.5	0.086	0.523
AVP	IL1B	9606.ENSP00000369647	9606.ENSP00000263341	0	0	0	0	0.063	0	0	0.4	0.413
AVP	CRH	9606.ENSP00000369647	9606.ENSP00000276571	0	0	0	0	0.099	0	0.4	0.67	0.806
AVP	HPGDS	9606.ENSP00000369647	9606.ENSP00000295256	0	0	0	0	0.067	0	0	0.483	0.497
AVP	TNF	9606.ENSP00000369647	9606.ENSP00000398698	0	0	0	0	0	0	0	0.4	0.4
BCHE	IL1B	9606.ENSP00000264381	9606.ENSP00000263341	0	0	0	0	0.055	0	0	0.453	0.461
BCHE	PTGS2	9606.ENSP00000264381	9606.ENSP00000356438	0	0	0	0	0.049	0.045	0	0.404	0.411
BCHE	TNF	9606.ENSP00000264381	9606.ENSP00000398698	0	0	0	0	0	0	0	0.45	0.45
BCHE	BDNF	9606.ENSP00000264381	9606.ENSP00000414303	0	0	0	0	0.055	0	0	0.552	0.559
BCHE	CP	9606.ENSP00000264381	9606.ENSP00000264613	0	0	0	0	0.092	0	0	0.568	0.591
BCHE	SLC18A3	9606.ENSP00000264381	9606.ENSP00000363229	0	0	0	0	0	0	0	0.659	0.659
BDNF	CD4	9606.ENSP00000414303	9606.ENSP00000011653	0	0	0	0	0	0	0	0.446	0.446
BDNF	HMOX1	9606.ENSP00000414303	9606.ENSP00000216117	0	0	0	0	0	0	0	0.627	0.627
BDNF	NFKBIA	9606.ENSP00000414303	9606.ENSP00000216797	0	0	0	0	0.056	0	0	0.391	0.4
BDNF	MMP2	9606.ENSP00000414303	9606.ENSP00000219070	0	0	0	0	0.059	0	0	0.425	0.436
BDNF	TGFB1	9606.ENSP00000414303	9606.ENSP00000221930	0	0	0	0	0	0	0	0.57	0.57
BDNF	HGF	9606.ENSP00000414303	9606.ENSP00000222390	0	0	0	0	0.042	0	0	0.599	0.599
BDNF	IL10RA	9606.ENSP00000414303	9606.ENSP00000227752	0	0	0	0	0	0	0	0.456	0.456
BDNF	CD68	9606.ENSP00000414303	9606.ENSP00000250092	0	0	0	0	0	0	0	0.434	0.434
BDNF	GFAP	9606.ENSP00000414303	9606.ENSP00000253408	0	0	0	0	0	0	0	0.804	0.804
BDNF	TLR2	9606.ENSP00000414303	9606.ENSP00000260010	0	0	0	0	0	0	0	0.615	0.615
BDNF	PLCB2	9606.ENSP00000414303	9606.ENSP00000260402	0	0	0	0	0	0	0	0.448	0.448
BDNF	FLT4	9606.ENSP00000414303	9606.ENSP00000261937	0	0	0	0	0	0	0.65	0.22	0.715
BDNF	IL1B	9606.ENSP00000414303	9606.ENSP00000263341	0	0	0	0	0.042	0	0	0.844	0.844
BDNF	FGF2	9606.ENSP00000414303	9606.ENSP00000264498	0	0	0	0	0.174	0	0	0.814	0.84
BDNF	STAT3	9606.ENSP00000414303	9606.ENSP00000264657	0	0	0	0	0	0	0	0.685	0.685
BDNF	ICAM1	9606.ENSP00000414303	9606.ENSP00000264832	0	0	0	0	0	0	0	0.621	0.621
BDNF	CRH	9606.ENSP00000414303	9606.ENSP00000276571	0	0	0	0	0.113	0	0	0.803	0.818
BDNF	CSF1R	9606.ENSP00000414303	9606.ENSP00000286301	0	0	0	0	0	0	0.65	0.343	0.76
BDNF	GRIN2C	9606.ENSP00000414303	9606.ENSP00000293190	0	0	0	0	0	0	0	0.624	0.624
BDNF	NPAS4	9606.ENSP00000414303	9606.ENSP00000311196	0	0	0	0	0	0	0.4	0.639	0.774
BDNF	FN1	9606.ENSP00000414303	9606.ENSP00000346839	0	0	0	0	0.083	0	0	0.682	0.695
BDNF	CX3CR1	9606.ENSP00000414303	9606.ENSP00000351059	0	0	0	0	0	0	0	0.517	0.517
BDNF	P2RX4	9606.ENSP00000414303	9606.ENSP00000353032	0	0	0	0	0	0	0	0.571	0.571
BDNF	PTGS2	9606.ENSP00000414303	9606.ENSP00000356438	0	0	0	0	0.111	0	0	0.626	0.654
BDNF	IL6R	9606.ENSP00000414303	9606.ENSP00000357470	0	0	0	0	0	0	0	0.41	0.41
BDNF	CD40	9606.ENSP00000414303	9606.ENSP00000361359	0	0	0	0	0	0	0	0.428	0.428
BDNF	TREM2	9606.ENSP00000414303	9606.ENSP00000362205	0	0	0	0	0	0	0	0.471	0.471
BDNF	TLR4	9606.ENSP00000414303	9606.ENSP00000363089	0	0	0	0	0	0	0	0.593	0.593
BDNF	SLC18A3	9606.ENSP00000414303	9606.ENSP00000363229	0	0	0	0	0	0	0	0.419	0.418
BDNF	ITPR3	9606.ENSP00000414303	9606.ENSP00000363435	0	0	0	0	0	0	0	0.557	0.557
BDNF	TNFRSF1B	9606.ENSP00000414303	9606.ENSP00000365435	0	0	0	0	0	0	0	0.513	0.513
BDNF	TH	9606.ENSP00000414303	9606.ENSP00000370571	0	0	0	0	0	0	0	0.837	0.837
BDNF	TSPO	9606.ENSP00000414303	9606.ENSP00000379563	0	0	0	0	0	0	0	0.415	0.414
BDNF	NFE2L2	9606.ENSP00000414303	9606.ENSP00000380252	0	0	0	0	0	0	0	0.494	0.494
BDNF	IL1R1	9606.ENSP00000414303	9606.ENSP00000386380	0	0	0	0	0	0	0	0.468	0.468
BDNF	CXCR4	9606.ENSP00000414303	9606.ENSP00000386884	0	0	0	0	0	0	0	0.492	0.492
BDNF	CD44	9606.ENSP00000414303	9606.ENSP00000398632	0	0	0	0	0	0	0	0.429	0.429
BDNF	TNF	9606.ENSP00000414303	9606.ENSP00000398698	0	0	0	0	0	0	0	0.739	0.739
BDNF	MYC	9606.ENSP00000414303	9606.ENSP00000478887	0	0	0	0	0	0	0	0.442	0.442
BDNF	CCL5	9606.ENSP00000414303	9606.ENSP00000474412	0	0	0	0	0	0	0	0.448	0.448
BDNF	CASP1	9606.ENSP00000414303	9606.ENSP00000433138	0	0	0	0	0	0	0	0.457	0.457
BDNF	ITGAM	9606.ENSP00000414303	9606.ENSP00000496959	0	0	0	0	0	0	0	0.476	0.476
BDNF	PECAM1	9606.ENSP00000414303	9606.ENSP00000457421	0	0	0	0	0	0	0	0.554	0.554
BDNF	SLC2A1	9606.ENSP00000414303	9606.ENSP00000416293	0	0	0	0	0	0	0	0.601	0.601
BDNF	DCX	9606.ENSP00000414303	9606.ENSP00000490614	0	0	0	0	0	0	0	0.778	0.778
BID	TNFRSF1A	9606.ENSP00000318822	9606.ENSP00000162749	0	0	0	0	0.125	0.448	0	0.62	0.8
BID	MSN	9606.ENSP00000318822	9606.ENSP00000353408	0	0	0	0	0.044	0.46	0	0	0.461
BID	TNF	9606.ENSP00000318822	9606.ENSP00000398698	0	0	0	0	0.132	0.096	0	0.376	0.467
BID	CASP7	9606.ENSP00000318822	9606.ENSP00000358327	0	0	0	0	0.095	0.048	0	0.478	0.512
BID	FASLG	9606.ENSP00000318822	9606.ENSP00000356694	0	0	0	0	0.042	0.742	0	0.507	0.867
BID	FAS	9606.ENSP00000318822	9606.ENSP00000498466	0	0	0	0	0.118	0.742	0	0.486	0.873
BID	CASP1	9606.ENSP00000318822	9606.ENSP00000433138	0	0	0	0	0.144	0.045	0.9	0.368	0.941
BID	CASP8	9606.ENSP00000318822	9606.ENSP00000351273	0	0	0	0	0.111	0.618	0.9	0.817	0.992
C1QA	CD4	9606.ENSP00000363773	9606.ENSP00000011653	0	0	0	0	0.264	0.091	0	0.309	0.498
C1QA	SPI1	9606.ENSP00000363773	9606.ENSP00000227163	0	0	0	0	0.36	0	0	0.305	0.536
C1QA	IL10RA	9606.ENSP00000363773	9606.ENSP00000227752	0	0	0	0	0.258	0	0	0.266	0.433
C1QA	C3	9606.ENSP00000363773	9606.ENSP00000245907	0	0	0	0	0.17	0	0	0.544	0.605
C1QA	CD68	9606.ENSP00000363773	9606.ENSP00000250092	0	0	0	0	0.23	0	0	0.684	0.746
C1QA	GFAP	9606.ENSP00000363773	9606.ENSP00000253408	0	0	0	0	0.074	0.05	0	0.43	0.454
C1QA	TLR2	9606.ENSP00000363773	9606.ENSP00000260010	0	0	0	0	0.247	0.091	0	0.336	0.506
C1QA	CD33	9606.ENSP00000363773	9606.ENSP00000262262	0	0	0	0	0.086	0.405	0	0.247	0.555
C1QA	IL1B	9606.ENSP00000363773	9606.ENSP00000263341	0	0	0	0	0.128	0	0	0.422	0.474
C1QA	IRF8	9606.ENSP00000363773	9606.ENSP00000268638	0	0	0	0	0.226	0.048	0	0.371	0.496
C1QA	CSF1R	9606.ENSP00000363773	9606.ENSP00000286301	0	0	0	0	0.695	0	0	0.706	0.906
C1QA	CCR2	9606.ENSP00000363773	9606.ENSP00000292301	0	0	0	0	0.176	0	0	0.416	0.499
C1QA	CCR5	9606.ENSP00000363773	9606.ENSP00000292303	0	0	0	0	0.399	0	0	0.32	0.574
C1QA	CXCL10	9606.ENSP00000363773	9606.ENSP00000305651	0	0	0	0	0.208	0	0	0.368	0.479
C1QA	STAB1	9606.ENSP00000363773	9606.ENSP00000312946	0	0	0	0	0.431	0	0	0.333	0.604
C1QA	C1QB	9606.ENSP00000363773	9606.ENSP00000313967	0	0	0.104	0.855	0.999	0.98	0.9	0.984	0.999
C1QA	MARCO	9606.ENSP00000363773	9606.ENSP00000318916	0	0	0.208	0.622	0.448	0	0	0.088	0.567
C1QA	CSF1	9606.ENSP00000363773	9606.ENSP00000327513	0	0	0	0	0.126	0	0	0.341	0.4
C1QA	FN1	9606.ENSP00000363773	9606.ENSP00000346839	0	0	0	0	0.061	0.298	0	0.244	0.459
C1QA	CX3CR1	9606.ENSP00000363773	9606.ENSP00000351059	0	0	0	0	0.176	0	0	0.547	0.611
C1QA	FASLG	9606.ENSP00000363773	9606.ENSP00000356694	0	0	0	0	0.072	0.045	0	0.393	0.415
C1QA	TREM2	9606.ENSP00000363773	9606.ENSP00000362205	0	0	0	0	0.482	0	0	0.73	0.854
C1QA	TLR4	9606.ENSP00000363773	9606.ENSP00000363089	0	0	0	0	0.233	0.091	0	0.284	0.457
C1QA	C1QC	9606.ENSP00000363773	9606.ENSP00000363770	0	0	0.117	0.819	0.999	0.972	0.9	0.984	0.999
C1QA	PECAM1	9606.ENSP00000363773	9606.ENSP00000457421	0	0	0	0	0.258	0.091	0	0.248	0.449
C1QA	TNF	9606.ENSP00000363773	9606.ENSP00000398698	0	0	0	0	0.134	0.065	0	0.378	0.452
C1QA	CD14	9606.ENSP00000363773	9606.ENSP00000385519	0	0	0	0	0.449	0	0	0.082	0.472
C1QA	ITGAX	9606.ENSP00000363773	9606.ENSP00000454623	0	0	0	0	0.178	0	0	0.409	0.494
C1QA	CCL5	9606.ENSP00000363773	9606.ENSP00000474412	0	0	0	0	0.122	0	0	0.582	0.617
C1QA	CYBB	9606.ENSP00000363773	9606.ENSP00000367851	0	0	0	0	0.36	0	0	0.545	0.697
C1QA	ITGAM	9606.ENSP00000363773	9606.ENSP00000496959	0	0	0	0	0.219	0	0	0.636	0.703
C1QA	TMEM119	9606.ENSP00000363773	9606.ENSP00000376553	0	0	0	0	0.126	0	0	0.677	0.705
C1QA	C4A	9606.ENSP00000363773	9606.ENSP00000396688	0	0	0	0	0.171	0	0.9	0.822	0.983
C1QB	CD4	9606.ENSP00000313967	9606.ENSP00000011653	0	0	0	0	0.181	0.091	0	0.27	0.409
C1QB	SPI1	9606.ENSP00000313967	9606.ENSP00000227163	0	0	0	0	0.278	0	0	0.241	0.428
C1QB	C3	9606.ENSP00000313967	9606.ENSP00000245907	0	0	0	0	0.108	0	0	0.445	0.483
C1QB	CD68	9606.ENSP00000313967	9606.ENSP00000250092	0	0	0	0	0.202	0	0	0.373	0.478
C1QB	TLR2	9606.ENSP00000313967	9606.ENSP00000260010	0	0	0	0	0.201	0.091	0	0.292	0.44
C1QB	CD33	9606.ENSP00000313967	9606.ENSP00000262262	0	0	0	0	0.118	0.405	0	0.167	0.525
C1QB	IL1B	9606.ENSP00000313967	9606.ENSP00000263341	0	0	0	0	0.083	0	0	0.509	0.53
C1QB	IRF8	9606.ENSP00000313967	9606.ENSP00000268638	0	0	0	0	0.221	0.048	0	0.349	0.475
C1QB	CSF1R	9606.ENSP00000313967	9606.ENSP00000286301	0	0	0	0	0.659	0	0	0.378	0.779
C1QB	CCR5	9606.ENSP00000313967	9606.ENSP00000292303	0	0	0	0	0.324	0	0	0.382	0.564
C1QB	CXCL10	9606.ENSP00000313967	9606.ENSP00000305651	0	0	0	0	0.252	0	0	0.306	0.458
C1QB	STAB1	9606.ENSP00000313967	9606.ENSP00000312946	0	0	0	0	0.404	0	0	0.286	0.557
C1QB	ITGAM	9606.ENSP00000313967	9606.ENSP00000496959	0	0	0	0	0.204	0	0	0.284	0.406
C1QB	CYBB	9606.ENSP00000313967	9606.ENSP00000367851	0	0	0	0	0.269	0	0	0.254	0.431
C1QB	CX3CR1	9606.ENSP00000313967	9606.ENSP00000351059	0	0	0	0	0.102	0	0	0.396	0.434
C1QB	PSMB9	9606.ENSP00000313967	9606.ENSP00000363993	0	0	0	0	0.068	0	0	0.431	0.447
C1QB	MARCO	9606.ENSP00000313967	9606.ENSP00000318916	0	0	0.225	0.622	0.34	0	0	0.066	0.48
C1QB	CD14	9606.ENSP00000313967	9606.ENSP00000385519	0	0	0	0	0.413	0	0	0.32	0.583
C1QB	TREM2	9606.ENSP00000313967	9606.ENSP00000362205	0	0	0	0	0.429	0	0	0.481	0.691
C1QB	FN1	9606.ENSP00000313967	9606.ENSP00000346839	0	0	0	0	0.054	0.395	0	0.515	0.698
C1QB	C4A	9606.ENSP00000313967	9606.ENSP00000396688	0	0	0	0	0.109	0	0.9	0.728	0.973
C1QB	C1QC	9606.ENSP00000313967	9606.ENSP00000363770	0	0	0.077	0.925	0.999	0.928	0.9	0.983	0.999
C1QC	CD4	9606.ENSP00000363770	9606.ENSP00000011653	0	0	0	0	0.169	0.125	0	0.243	0.401
C1QC	SPI1	9606.ENSP00000363770	9606.ENSP00000227163	0	0	0	0	0.327	0	0	0.2	0.439
C1QC	IL10RA	9606.ENSP00000363770	9606.ENSP00000227752	0	0	0	0	0.209	0	0	0.301	0.424
C1QC	C3	9606.ENSP00000363770	9606.ENSP00000245907	0	0	0	0	0.166	0	0	0.55	0.608
C1QC	CD68	9606.ENSP00000363770	9606.ENSP00000250092	0	0	0	0	0.311	0	0	0.357	0.538
C1QC	CD33	9606.ENSP00000363770	9606.ENSP00000262262	0	0	0	0	0.094	0.407	0	0.154	0.506
C1QC	IRF8	9606.ENSP00000363770	9606.ENSP00000268638	0	0	0	0	0.251	0	0	0.314	0.464
C1QC	CSF1R	9606.ENSP00000363770	9606.ENSP00000286301	0	0	0	0	0.556	0	0	0.587	0.809
C1QC	NPAS4	9606.ENSP00000363770	9606.ENSP00000311196	0	0	0	0	0	0	0	0.404	0.404
C1QC	STAB1	9606.ENSP00000363770	9606.ENSP00000312946	0	0	0	0	0.395	0	0	0.289	0.552
C1QC	MARCO	9606.ENSP00000363770	9606.ENSP00000318916	0	0	0.21	0.626	0.26	0.144	0	0.056	0.465
C1QC	ITGAL	9606.ENSP00000363770	9606.ENSP00000349252	0	0	0	0	0.132	0	0	0.398	0.455
C1QC	CX3CR1	9606.ENSP00000363770	9606.ENSP00000351059	0	0	0	0	0.131	0	0	0.366	0.425
C1QC	TREM2	9606.ENSP00000363770	9606.ENSP00000362205	0	0	0	0	0.45	0	0	0.446	0.682
C1QC	C4A	9606.ENSP00000363770	9606.ENSP00000396688	0	0	0	0	0.167	0	0.9	0.701	0.972
C3	CD4	9606.ENSP00000245907	9606.ENSP00000011653	0	0	0	0	0.044	0	0	0.589	0.59
C3	RELA	9606.ENSP00000245907	9606.ENSP00000384273	0	0	0	0	0.085	0.292	0	0.151	0.402
C3	CD40	9606.ENSP00000245907	9606.ENSP00000361359	0	0	0	0	0.083	0	0	0.375	0.402
C3	TREM2	9606.ENSP00000245907	9606.ENSP00000362205	0	0	0	0	0.124	0	0	0.358	0.413
C3	MYD88	9606.ENSP00000245907	9606.ENSP00000498321	0	0	0	0	0.042	0	0	0.418	0.419
C3	CD68	9606.ENSP00000245907	9606.ENSP00000250092	0	0	0	0	0.083	0	0	0.4	0.426
C3	CCL5	9606.ENSP00000245907	9606.ENSP00000474412	0	0	0	0	0.083	0	0	0.4	0.426
C3	CXCL10	9606.ENSP00000245907	9606.ENSP00000305651	0	0	0	0	0.142	0	0	0.397	0.46
C3	TLR4	9606.ENSP00000245907	9606.ENSP00000363089	0	0	0	0	0.048	0	0	0.507	0.51
C3	P2RX4	9606.ENSP00000245907	9606.ENSP00000353032	0	0	0	0	0.049	0	0.5	0.075	0.521
C3	TLR2	9606.ENSP00000245907	9606.ENSP00000260010	0	0	0	0	0.094	0	0	0.506	0.533
C3	P2RX7	9606.ENSP00000245907	9606.ENSP00000330696	0	0	0	0	0.048	0	0.5	0.118	0.543
C3	CD8A	9606.ENSP00000245907	9606.ENSP00000386559	0	0	0	0	0.053	0	0	0.543	0.548
C3	ITGAL	9606.ENSP00000245907	9606.ENSP00000349252	0	0	0	0	0.083	0	0	0.55	0.57
C3	TNF	9606.ENSP00000245907	9606.ENSP00000398698	0	0	0	0	0.042	0	0	0.621	0.621
C3	FN1	9606.ENSP00000245907	9606.ENSP00000346839	0	0	0	0	0.108	0.096	0	0.57	0.623
C3	IL1B	9606.ENSP00000245907	9606.ENSP00000263341	0	0	0	0	0.105	0	0	0.64	0.664
C3	ICAM1	9606.ENSP00000245907	9606.ENSP00000264832	0	0	0	0	0.169	0	0	0.66	0.705
C3	CP	9606.ENSP00000245907	9606.ENSP00000264613	0	0	0	0	0.262	0	0	0.676	0.751
C3	ITGAX	9606.ENSP00000245907	9606.ENSP00000454623	0	0	0	0	0.071	0.292	0.9	0.59	0.969
C3	C4A	9606.ENSP00000245907	9606.ENSP00000396688	0	0	0	0.741	0.174	0	0.9	0.987	0.998
C3	ITGAM	9606.ENSP00000245907	9606.ENSP00000496959	0	0	0	0	0.054	0.926	0.9	0.915	0.999
C4A	CD4	9606.ENSP00000396688	9606.ENSP00000011653	0	0	0	0	0.067	0	0	0.44	0.456
C4A	IL1B	9606.ENSP00000396688	9606.ENSP00000263341	0	0	0	0	0.067	0	0	0.476	0.49
C4A	CP	9606.ENSP00000396688	9606.ENSP00000264613	0	0	0	0	0.163	0	0	0.631	0.678
C4A	FN1	9606.ENSP00000396688	9606.ENSP00000346839	0	0	0	0	0.093	0.096	0	0.396	0.461
C4A	CX3CR1	9606.ENSP00000396688	9606.ENSP00000351059	0	0	0	0	0.074	0	0	0.545	0.56
C4A	TREM2	9606.ENSP00000396688	9606.ENSP00000362205	0	0	0	0	0.133	0	0	0.377	0.437
C4A	CCL5	9606.ENSP00000396688	9606.ENSP00000474412	0	0	0	0	0.042	0.305	0	0.315	0.504
C4A	ITGAM	9606.ENSP00000396688	9606.ENSP00000496959	0	0	0	0	0.071	0	0	0.489	0.505
C4A	TNF	9606.ENSP00000396688	9606.ENSP00000398698	0	0	0	0	0	0	0	0.506	0.506
CASP1	CD4	9606.ENSP00000433138	9606.ENSP00000011653	0	0	0	0	0.12	0.046	0	0.687	0.715
CASP1	TNFRSF1A	9606.ENSP00000433138	9606.ENSP00000162749	0	0	0	0	0.144	0	0	0.709	0.74
CASP1	HMOX1	9606.ENSP00000433138	9606.ENSP00000216117	0	0	0	0	0.074	0	0	0.584	0.598
CASP1	NFKBIA	9606.ENSP00000433138	9606.ENSP00000216797	0	0	0	0	0.139	0.076	0	0.632	0.681
CASP1	TGFB1	9606.ENSP00000433138	9606.ENSP00000221930	0	0	0	0	0.145	0	0	0.517	0.57
CASP1	SPI1	9606.ENSP00000433138	9606.ENSP00000227163	0	0	0	0	0.181	0	0	0.414	0.499
CASP1	IL10RA	9606.ENSP00000433138	9606.ENSP00000227752	0	0	0	0	0.261	0	0	0.256	0.427
CASP1	CD68	9606.ENSP00000433138	9606.ENSP00000250092	0	0	0	0	0.203	0	0	0.536	0.615
CASP1	GFAP	9606.ENSP00000433138	9606.ENSP00000253408	0	0	0	0	0.053	0.125	0	0.427	0.483
CASP1	TLR2	9606.ENSP00000433138	9606.ENSP00000260010	0	0	0	0	0.31	0.062	0	0.729	0.809
CASP1	IL37	9606.ENSP00000433138	9606.ENSP00000263326	0	0	0	0	0.052	0.292	0.7	0.77	0.947
CASP1	IL1B	9606.ENSP00000433138	9606.ENSP00000263341	0	0	0	0	0.265	0.787	0.9	0.987	0.999
CASP1	FGF2	9606.ENSP00000433138	9606.ENSP00000264498	0	0	0	0	0.067	0.292	0	0.335	0.522
CASP1	STAT3	9606.ENSP00000433138	9606.ENSP00000264657	0	0	0	0	0.101	0	0	0.583	0.609
CASP1	ICAM1	9606.ENSP00000433138	9606.ENSP00000264832	0	0	0	0	0.159	0	0	0.601	0.65
CASP1	IRF8	9606.ENSP00000433138	9606.ENSP00000268638	0	0	0	0	0.189	0	0	0.364	0.463
CASP1	CSF1R	9606.ENSP00000433138	9606.ENSP00000286301	0	0	0	0	0.216	0	0	0.308	0.435
CASP1	NCF1	9606.ENSP00000433138	9606.ENSP00000289473	0	0	0	0	0.172	0	0	0.37	0.456
CASP1	CCR2	9606.ENSP00000433138	9606.ENSP00000292301	0	0	0	0	0.158	0	0	0.448	0.515
CASP1	CCR5	9606.ENSP00000433138	9606.ENSP00000292303	0	0	0	0	0.208	0	0	0.399	0.503
CASP1	CXCL10	9606.ENSP00000433138	9606.ENSP00000305651	0	0	0	0	0.213	0	0	0.582	0.657
CASP1	CXCL11	9606.ENSP00000433138	9606.ENSP00000306884	0	0	0	0	0.171	0	0	0.32	0.412
CASP1	NOS2	9606.ENSP00000433138	9606.ENSP00000327251	0	0	0	0	0	0	0	0.428	0.428
CASP1	CSF1	9606.ENSP00000433138	9606.ENSP00000327513	0	0	0	0	0.135	0	0	0.477	0.529
CASP1	P2RX7	9606.ENSP00000433138	9606.ENSP00000330696	0	0	0	0	0.082	0	0	0.784	0.793
CASP1	NLRP3	9606.ENSP00000433138	9606.ENSP00000337383	0	0	0	0	0.15	0.307	0.9	0.999	0.999
CASP1	FN1	9606.ENSP00000433138	9606.ENSP00000346839	0	0	0	0	0	0	0	0.402	0.402
CASP1	CX3CR1	9606.ENSP00000433138	9606.ENSP00000351059	0	0	0	0	0.096	0	0	0.415	0.448
CASP1	CASP8	9606.ENSP00000433138	9606.ENSP00000351273	0	0	0	0.58	0.152	0.544	0.9	0.986	0.999
CASP1	P2RX4	9606.ENSP00000433138	9606.ENSP00000353032	0	0	0	0	0.044	0	0	0.411	0.412
CASP1	STAT1	9606.ENSP00000433138	9606.ENSP00000354394	0	0	0	0	0.301	0	0	0.591	0.702
CASP1	PTGS2	9606.ENSP00000433138	9606.ENSP00000356438	0	0	0	0	0.145	0	0	0.586	0.631
CASP1	FASLG	9606.ENSP00000433138	9606.ENSP00000356694	0	0	0	0	0.065	0	0	0.587	0.597
CASP1	CASP7	9606.ENSP00000433138	9606.ENSP00000358327	0	0	0	0.588	0.107	0	0.54	0.319	0.696
CASP1	CD40	9606.ENSP00000433138	9606.ENSP00000361359	0	0	0	0	0.095	0	0	0.456	0.487
CASP1	TLR4	9606.ENSP00000433138	9606.ENSP00000363089	0	0	0	0	0.263	0.062	0	0.888	0.916
CASP1	PSMB9	9606.ENSP00000433138	9606.ENSP00000363993	0	0	0	0	0.387	0	0	0.215	0.499
CASP1	PSMB8	9606.ENSP00000433138	9606.ENSP00000364016	0	0	0	0	0.376	0	0	0.206	0.484
CASP1	TNFRSF1B	9606.ENSP00000433138	9606.ENSP00000365435	0	0	0	0	0.205	0	0	0.324	0.439
CASP1	CYBB	9606.ENSP00000433138	9606.ENSP00000367851	0	0	0	0	0.267	0	0	0.543	0.651
CASP1	IL4R	9606.ENSP00000433138	9606.ENSP00000379111	0	0	0	0	0.099	0.067	0	0.436	0.484
CASP1	TSPO	9606.ENSP00000433138	9606.ENSP00000379563	0	0	0	0	0.146	0	0	0.33	0.404
CASP1	NFE2L2	9606.ENSP00000433138	9606.ENSP00000380252	0	0	0	0	0.091	0.292	0	0.491	0.644
CASP1	RELA	9606.ENSP00000433138	9606.ENSP00000384273	0	0	0	0	0.103	0.061	0	0.401	0.452
CASP1	IL1R1	9606.ENSP00000433138	9606.ENSP00000386380	0	0	0	0	0.121	0	0	0.865	0.876
CASP1	CD8A	9606.ENSP00000433138	9606.ENSP00000386559	0	0	0	0	0.133	0	0	0.606	0.644
CASP1	CXCR4	9606.ENSP00000433138	9606.ENSP00000386884	0	0	0	0	0.134	0	0	0.373	0.435
CASP1	CD44	9606.ENSP00000433138	9606.ENSP00000398632	0	0	0	0	0.182	0	0	0.362	0.456
CASP1	TNF	9606.ENSP00000433138	9606.ENSP00000398698	0	0	0	0	0.171	0.091	0	0.883	0.904
CASP1	PECAM1	9606.ENSP00000433138	9606.ENSP00000457421	0	0	0	0	0.197	0.046	0	0.321	0.434
CASP1	ITGAX	9606.ENSP00000433138	9606.ENSP00000454623	0	0	0	0	0.183	0	0	0.509	0.582
CASP1	CCL5	9606.ENSP00000433138	9606.ENSP00000474412	0	0	0	0	0.233	0	0	0.55	0.64
CASP1	ITGAM	9606.ENSP00000433138	9606.ENSP00000496959	0	0	0	0	0.217	0	0	0.585	0.661
CASP1	FAS	9606.ENSP00000433138	9606.ENSP00000498466	0	0	0	0	0.258	0.071	0	0.785	0.838
CASP1	MYD88	9606.ENSP00000433138	9606.ENSP00000498321	0	0	0	0	0.189	0.046	0	0.907	0.921
CASP7	TNFRSF1A	9606.ENSP00000358327	9606.ENSP00000162749	0	0	0	0	0.064	0.423	0	0.642	0.789
CASP7	NFKBIA	9606.ENSP00000358327	9606.ENSP00000216797	0	0	0	0	0.061	0.076	0	0.397	0.432
CASP7	IL1B	9606.ENSP00000358327	9606.ENSP00000263341	0	0	0	0	0.05	0	0	0.465	0.47
CASP7	STAT3	9606.ENSP00000358327	9606.ENSP00000264657	0	0	0	0	0.073	0	0	0.472	0.49
CASP7	CDK2	9606.ENSP00000358327	9606.ENSP00000266970	0	0	0	0	0.147	0	0	0.482	0.539
CASP7	CASP8	9606.ENSP00000358327	9606.ENSP00000351273	0	0	0.083	0.746	0.109	0.628	0.9	0.788	0.992
CASP7	STAT1	9606.ENSP00000358327	9606.ENSP00000354394	0	0	0	0	0.139	0.421	0	0.356	0.651
CASP7	FASLG	9606.ENSP00000358327	9606.ENSP00000356694	0	0	0	0	0.057	0	0	0.669	0.675
CASP7	CDKN1A	9606.ENSP00000358327	9606.ENSP00000384849	0	0	0	0	0.074	0	0	0.428	0.448
CASP7	MYC	9606.ENSP00000358327	9606.ENSP00000478887	0	0	0	0	0	0	0	0.451	0.451
CASP7	FAS	9606.ENSP00000358327	9606.ENSP00000498466	0	0	0	0	0.132	0.071	0	0.479	0.543
CASP7	TNF	9606.ENSP00000358327	9606.ENSP00000398698	0	0	0	0	0.087	0.096	0	0.534	0.582
CASP8	CD4	9606.ENSP00000351273	9606.ENSP00000011653	0	0	0	0	0.044	0.046	0	0.583	0.586
CASP8	TNFRSF1A	9606.ENSP00000351273	9606.ENSP00000162749	0	0	0	0	0.045	0.593	0	0.996	0.998
CASP8	HMOX1	9606.ENSP00000351273	9606.ENSP00000216117	0	0	0	0	0.042	0	0	0.665	0.665
CASP8	NFKBIA	9606.ENSP00000351273	9606.ENSP00000216797	0	0	0	0	0.078	0.076	0	0.661	0.686
CASP8	MMP2	9606.ENSP00000351273	9606.ENSP00000219070	0	0	0	0	0.063	0	0	0.478	0.49
CASP8	TGFB1	9606.ENSP00000351273	9606.ENSP00000221930	0	0	0	0	0.08	0	0	0.48	0.501
CASP8	TLR2	9606.ENSP00000351273	9606.ENSP00000260010	0	0	0	0	0.111	0.062	0	0.48	0.529
CASP8	IL1B	9606.ENSP00000351273	9606.ENSP00000263341	0	0	0	0	0.081	0.32	0.5	0.839	0.943
CASP8	STAT3	9606.ENSP00000351273	9606.ENSP00000264657	0	0	0	0	0.077	0	0	0.619	0.634
CASP8	ICAM1	9606.ENSP00000351273	9606.ENSP00000264832	0	0	0	0	0.077	0	0	0.451	0.472
CASP8	CDK2	9606.ENSP00000351273	9606.ENSP00000266970	0	0	0	0	0.074	0	0	0.747	0.756
CASP8	CXCL10	9606.ENSP00000351273	9606.ENSP00000305651	0	0	0	0	0.062	0	0	0.391	0.404
CASP8	NLRP3	9606.ENSP00000351273	9606.ENSP00000337383	0	0	0	0	0.058	0.242	0	0.934	0.948
CASP8	FN1	9606.ENSP00000351273	9606.ENSP00000346839	0	0	0	0	0	0	0	0.411	0.411
CASP8	ITGAM	9606.ENSP00000351273	9606.ENSP00000496959	0	0	0	0	0.101	0	0	0.379	0.418
CASP8	TGFBR2	9606.ENSP00000351273	9606.ENSP00000351905	0	0	0	0	0.167	0.067	0	0.313	0.42
CASP8	CCL5	9606.ENSP00000351273	9606.ENSP00000474412	0	0	0	0	0.125	0	0	0.374	0.428
CASP8	IL1R1	9606.ENSP00000351273	9606.ENSP00000386380	0	0	0	0	0.088	0	0	0.414	0.443
CASP8	CXCR4	9606.ENSP00000351273	9606.ENSP00000386884	0	0	0	0	0.13	0	0	0.391	0.447
CASP8	TNFRSF1B	9606.ENSP00000351273	9606.ENSP00000365435	0	0	0	0	0.106	0	0	0.447	0.484
CASP8	CD44	9606.ENSP00000351273	9606.ENSP00000398632	0	0	0	0	0.106	0	0	0.455	0.491
CASP8	NFE2L2	9606.ENSP00000351273	9606.ENSP00000380252	0	0	0	0	0.104	0	0	0.461	0.497
CASP8	MSN	9606.ENSP00000351273	9606.ENSP00000353408	0	0	0	0	0.042	0.448	0	0.147	0.509
CASP8	CD14	9606.ENSP00000351273	9606.ENSP00000385519	0	0	0	0	0.067	0	0.5	0.064	0.526
CASP8	STAT1	9606.ENSP00000351273	9606.ENSP00000354394	0	0	0	0	0.12	0	0	0.519	0.559
CASP8	CD8A	9606.ENSP00000351273	9606.ENSP00000386559	0	0	0	0	0.093	0	0	0.572	0.595
CASP8	CDKN1A	9606.ENSP00000351273	9606.ENSP00000384849	0	0	0	0	0.068	0	0	0.61	0.621
CASP8	CD40	9606.ENSP00000351273	9606.ENSP00000361359	0	0	0	0	0.091	0	0	0.604	0.625
CASP8	PTGS2	9606.ENSP00000351273	9606.ENSP00000356438	0	0	0	0	0.098	0	0	0.681	0.7
CASP8	RELA	9606.ENSP00000351273	9606.ENSP00000384273	0	0	0	0	0.089	0.061	0	0.681	0.704
CASP8	MYD88	9606.ENSP00000351273	9606.ENSP00000498321	0	0	0	0	0.074	0.046	0	0.731	0.742
CASP8	MYC	9606.ENSP00000351273	9606.ENSP00000478887	0	0	0	0	0.067	0.124	0	0.763	0.79
CASP8	TLR4	9606.ENSP00000351273	9606.ENSP00000363089	0	0	0	0	0.14	0.062	0.5	0.749	0.885
CASP8	TNF	9606.ENSP00000351273	9606.ENSP00000398698	0	0	0	0	0.101	0.994	0	0.928	0.999
CASP8	FAS	9606.ENSP00000351273	9606.ENSP00000498466	0	0	0	0	0.127	0.927	0.9	0.997	0.999
CASP8	FASLG	9606.ENSP00000351273	9606.ENSP00000356694	0	0	0	0	0.097	0.836	0.5	0.992	0.999
CCL5	CD4	9606.ENSP00000474412	9606.ENSP00000011653	0	0	0	0	0.102	0.099	0	0.871	0.887
CCL5	TNFRSF1A	9606.ENSP00000474412	9606.ENSP00000162749	0	0	0	0	0.065	0	0	0.711	0.718
CCL5	HMOX1	9606.ENSP00000474412	9606.ENSP00000216117	0	0	0	0	0.062	0	0	0.42	0.433
CCL5	NFKBIA	9606.ENSP00000474412	9606.ENSP00000216797	0	0	0	0	0.091	0	0	0.585	0.607
CCL5	MMP2	9606.ENSP00000474412	9606.ENSP00000219070	0	0	0	0	0.042	0	0	0.507	0.507
CCL5	TGFB1	9606.ENSP00000474412	9606.ENSP00000221930	0	0	0	0	0.056	0.069	0	0.68	0.694
CCL5	HGF	9606.ENSP00000474412	9606.ENSP00000222390	0	0	0	0	0	0	0	0.574	0.574
CCL5	IL10RA	9606.ENSP00000474412	9606.ENSP00000227752	0	0	0	0	0.319	0	0	0.595	0.712
CCL5	CD68	9606.ENSP00000474412	9606.ENSP00000250092	0	0	0	0	0.097	0	0	0.625	0.647
CCL5	TLR2	9606.ENSP00000474412	9606.ENSP00000260010	0	0	0	0	0.177	0	0	0.696	0.739
CCL5	CD33	9606.ENSP00000474412	9606.ENSP00000262262	0	0	0	0	0.086	0.096	0	0.349	0.415
CCL5	IL1B	9606.ENSP00000474412	9606.ENSP00000263341	0	0	0	0	0.148	0	0.4	0.888	0.938
CCL5	FGF2	9606.ENSP00000474412	9606.ENSP00000264498	0	0	0	0	0.042	0	0	0.627	0.627
CCL5	STAT3	9606.ENSP00000474412	9606.ENSP00000264657	0	0	0	0	0.064	0	0.5	0.678	0.836
CCL5	ICAM1	9606.ENSP00000474412	9606.ENSP00000264832	0	0	0	0	0.133	0	0	0.784	0.805
CCL5	IRF8	9606.ENSP00000474412	9606.ENSP00000268638	0	0	0	0	0.166	0	0	0.432	0.506
CCL5	CSF1R	9606.ENSP00000474412	9606.ENSP00000286301	0	0	0	0	0.165	0	0	0.82	0.844
CCL5	CCR2	9606.ENSP00000474412	9606.ENSP00000292301	0	0	0	0	0.133	0.045	0.65	0.998	0.999
CCL5	CCR5	9606.ENSP00000474412	9606.ENSP00000292303	0	0	0	0	0.253	0.982	0.9	0.999	0.999
CCL5	CXCL16	9606.ENSP00000474412	9606.ENSP00000293778	0	0	0	0	0.131	0	0.5	0.785	0.898
CCL5	CXCL10	9606.ENSP00000474412	9606.ENSP00000305651	0	0	0	0	0.362	0.994	0.5	0.95	0.999
CCL5	CXCL11	9606.ENSP00000474412	9606.ENSP00000306884	0	0	0	0	0.355	0.994	0.5	0.885	0.999
CCL5	NOS2	9606.ENSP00000474412	9606.ENSP00000327251	0	0	0	0	0.042	0	0	0.678	0.678
CCL5	CSF1	9606.ENSP00000474412	9606.ENSP00000327513	0	0	0	0	0.07	0	0	0.724	0.732
CCL5	NLRP3	9606.ENSP00000474412	9606.ENSP00000337383	0	0	0	0	0.128	0	0	0.48	0.527
CCL5	FN1	9606.ENSP00000474412	9606.ENSP00000346839	0	0	0	0	0	0	0	0.696	0.696
CCL5	ITGAL	9606.ENSP00000474412	9606.ENSP00000349252	0	0	0	0	0.292	0	0	0.445	0.59
CCL5	CX3CR1	9606.ENSP00000474412	9606.ENSP00000351059	0	0	0	0	0.126	0.045	0.65	0.981	0.993
CCL5	TGFBR2	9606.ENSP00000474412	9606.ENSP00000351905	0	0	0	0	0.06	0	0	0.549	0.558
CCL5	STAT1	9606.ENSP00000474412	9606.ENSP00000354394	0	0	0	0	0.206	0	0	0.779	0.817
CCL5	PTGS2	9606.ENSP00000474412	9606.ENSP00000356438	0	0	0	0	0.097	0	0	0.812	0.823
CCL5	FASLG	9606.ENSP00000474412	9606.ENSP00000356694	0	0	0	0	0.257	0	0	0.729	0.79
CCL5	IL6R	9606.ENSP00000474412	9606.ENSP00000357470	0	0	0	0	0.088	0	0	0.478	0.503
CCL5	CD40	9606.ENSP00000474412	9606.ENSP00000361359	0	0	0	0	0.087	0	0	0.673	0.689
CCL5	ENG	9606.ENSP00000474412	9606.ENSP00000362299	0	0	0	0	0.053	0	0	0.398	0.405
CCL5	TLR4	9606.ENSP00000474412	9606.ENSP00000363089	0	0	0	0	0.118	0	0	0.804	0.82
CCL5	PSMB9	9606.ENSP00000474412	9606.ENSP00000363993	0	0	0	0	0.274	0	0	0.272	0.449
CCL5	PSMB8	9606.ENSP00000474412	9606.ENSP00000364016	0	0	0	0	0.27	0	0	0.256	0.434
CCL5	TNFRSF1B	9606.ENSP00000474412	9606.ENSP00000365435	0	0	0	0	0.128	0	0	0.48	0.527
CCL5	CYBB	9606.ENSP00000474412	9606.ENSP00000367851	0	0	0	0	0.148	0	0	0.583	0.63
CCL5	IL4R	9606.ENSP00000474412	9606.ENSP00000379111	0	0	0	0	0.08	0	0	0.451	0.473
CCL5	IL15RA	9606.ENSP00000474412	9606.ENSP00000380421	0	0	0	0	0.084	0	0	0.546	0.566
CCL5	RELA	9606.ENSP00000474412	9606.ENSP00000384273	0	0	0	0	0.059	0.079	0.9	0.475	0.948
CCL5	IL1R1	9606.ENSP00000474412	9606.ENSP00000386380	0	0	0	0	0.044	0	0	0.581	0.582
CCL5	CD8A	9606.ENSP00000474412	9606.ENSP00000386559	0	0	0	0	0.692	0	0	0.874	0.959
CCL5	CXCR4	9606.ENSP00000474412	9606.ENSP00000386884	0	0	0	0	0.068	0	0.65	0.997	0.998
CCL5	CD44	9606.ENSP00000474412	9606.ENSP00000398632	0	0	0	0	0.117	0	0	0.802	0.818
CCL5	TNF	9606.ENSP00000474412	9606.ENSP00000398698	0	0	0	0	0.202	0	0.4	0.924	0.96
CCL5	ITGAX	9606.ENSP00000474412	9606.ENSP00000454623	0	0	0	0	0.214	0	0	0.621	0.689
CCL5	PECAM1	9606.ENSP00000474412	9606.ENSP00000457421	0	0	0	0	0.152	0.099	0	0.511	0.594
CCL5	MMP12	9606.ENSP00000474412	9606.ENSP00000458585	0	0	0	0	0.056	0	0	0.433	0.441
CCL5	MYC	9606.ENSP00000474412	9606.ENSP00000478887	0	0	0	0	0.1	0	0	0.627	0.649
CCL5	MYD88	9606.ENSP00000474412	9606.ENSP00000498321	0	0	0	0	0.068	0	0	0.661	0.671
CCL5	ITGAM	9606.ENSP00000474412	9606.ENSP00000496959	0	0	0	0	0.194	0	0	0.802	0.833
CCR2	CD4	9606.ENSP00000292301	9606.ENSP00000011653	0	0	0	0	0.184	0.091	0	0.888	0.909
CCR2	TNFRSF1A	9606.ENSP00000292301	9606.ENSP00000162749	0	0	0	0	0.044	0	0	0.621	0.622
CCR2	MMP2	9606.ENSP00000292301	9606.ENSP00000219070	0	0	0	0	0	0	0	0.4	0.4
CCR2	TGFB1	9606.ENSP00000292301	9606.ENSP00000221930	0	0	0	0	0.067	0.069	0	0.662	0.68
CCR2	HGF	9606.ENSP00000292301	9606.ENSP00000222390	0	0	0	0	0.097	0.052	0	0.39	0.432
CCR2	SPI1	9606.ENSP00000292301	9606.ENSP00000227163	0	0	0	0	0.263	0	0	0.398	0.537
CCR2	IL10RA	9606.ENSP00000292301	9606.ENSP00000227752	0	0	0	0	0.232	0	0	0.584	0.667
CCR2	CD68	9606.ENSP00000292301	9606.ENSP00000250092	0	0	0	0	0.11	0	0	0.771	0.788
CCR2	GFAP	9606.ENSP00000292301	9606.ENSP00000253408	0	0	0	0	0	0	0	0.453	0.453
CCR2	TLR2	9606.ENSP00000292301	9606.ENSP00000260010	0	0	0	0	0.147	0	0	0.734	0.764
CCR2	PLCB2	9606.ENSP00000292301	9606.ENSP00000260402	0	0	0	0	0.138	0	0	0.459	0.513
CCR2	CD33	9606.ENSP00000292301	9606.ENSP00000262262	0	0	0	0	0.18	0.098	0	0.434	0.544
CCR2	IL1B	9606.ENSP00000292301	9606.ENSP00000263341	0	0	0	0	0.134	0	0	0.852	0.867
CCR2	FGF2	9606.ENSP00000292301	9606.ENSP00000264498	0	0	0	0	0	0	0	0.401	0.4
CCR2	STAT3	9606.ENSP00000292301	9606.ENSP00000264657	0	0	0	0	0.049	0	0.5	0.597	0.791
CCR2	ICAM1	9606.ENSP00000292301	9606.ENSP00000264832	0	0	0	0	0.106	0	0	0.809	0.822
CCR2	IRF8	9606.ENSP00000292301	9606.ENSP00000268638	0	0	0	0	0.179	0	0	0.448	0.527
CCR2	CSF1R	9606.ENSP00000292301	9606.ENSP00000286301	0	0	0	0	0.198	0	0	0.735	0.778
CCR2	MARCO	9606.ENSP00000292301	9606.ENSP00000318916	0	0	0	0	0.188	0	0	0.299	0.407
CCR2	CSF2RB	9606.ENSP00000292301	9606.ENSP00000384053	0	0	0	0	0.25	0	0	0.26	0.421
CCR2	MMP12	9606.ENSP00000292301	9606.ENSP00000458585	0	0	0	0	0.044	0	0	0.434	0.435
CCR2	NLRP3	9606.ENSP00000292301	9606.ENSP00000337383	0	0	0	0	0.086	0	0	0.42	0.447
CCR2	IL6R	9606.ENSP00000292301	9606.ENSP00000357470	0	0	0	0	0.104	0	0	0.419	0.457
CCR2	PTGS2	9606.ENSP00000292301	9606.ENSP00000356438	0	0	0	0	0.08	0	0	0.45	0.472
CCR2	FN1	9606.ENSP00000292301	9606.ENSP00000346839	0	0	0	0	0	0	0	0.478	0.478
CCR2	IL4R	9606.ENSP00000292301	9606.ENSP00000379111	0	0	0	0	0.067	0	0	0.479	0.493
CCR2	FASLG	9606.ENSP00000292301	9606.ENSP00000356694	0	0	0	0	0.15	0	0	0.446	0.509
CCR2	NOS2	9606.ENSP00000292301	9606.ENSP00000327251	0	0	0	0	0	0	0	0.519	0.519
CCR2	IL1R1	9606.ENSP00000292301	9606.ENSP00000386380	0	0	0	0	0.053	0	0	0.54	0.545
CCR2	ITGAL	9606.ENSP00000292301	9606.ENSP00000349252	0	0	0	0	0.222	0	0	0.445	0.549
CCR2	STAT1	9606.ENSP00000292301	9606.ENSP00000354394	0	0	0	0	0.097	0	0	0.524	0.552
CCR2	MYD88	9606.ENSP00000292301	9606.ENSP00000498321	0	0	0	0	0.072	0	0	0.542	0.556
CCR2	PECAM1	9606.ENSP00000292301	9606.ENSP00000457421	0	0	0	0	0.098	0.091	0	0.507	0.56
CCR2	TREM2	9606.ENSP00000292301	9606.ENSP00000362205	0	0	0	0	0.101	0	0	0.531	0.561
CCR2	TMEM119	9606.ENSP00000292301	9606.ENSP00000376553	0	0	0	0	0.055	0	0	0.568	0.574
CCR2	CYBB	9606.ENSP00000292301	9606.ENSP00000367851	0	0	0	0	0.354	0	0	0.413	0.604
CCR2	CD40	9606.ENSP00000292301	9606.ENSP00000361359	0	0	0	0	0.044	0	0	0.609	0.61
CCR2	TNFRSF1B	9606.ENSP00000292301	9606.ENSP00000365435	0	0	0	0	0.149	0	0.4	0.348	0.638
CCR2	CD44	9606.ENSP00000292301	9606.ENSP00000398632	0	0	0	0	0.082	0	0	0.678	0.691
CCR2	TLR4	9606.ENSP00000292301	9606.ENSP00000363089	0	0	0	0	0.206	0	0	0.684	0.738
CCR2	ITGAX	9606.ENSP00000292301	9606.ENSP00000454623	0	0	0	0	0.12	0	0	0.732	0.754
CCR2	TNF	9606.ENSP00000292301	9606.ENSP00000398698	0	0	0	0	0.084	0	0	0.761	0.771
CCR2	ITGAM	9606.ENSP00000292301	9606.ENSP00000496959	0	0	0	0	0.179	0	0	0.797	0.826
CCR2	CX3CR1	9606.ENSP00000292301	9606.ENSP00000351059	0	0	0.079	0.882	0.256	0	0.5	0.577	0.835
CCR2	CSF1	9606.ENSP00000292301	9606.ENSP00000327513	0	0	0	0	0	0	0	0.837	0.837
CCR2	CD8A	9606.ENSP00000292301	9606.ENSP00000386559	0	0	0	0	0.155	0	0	0.819	0.84
CCR2	CXCL16	9606.ENSP00000292301	9606.ENSP00000293778	0	0	0	0	0.06	0	0.65	0.743	0.908
CCR2	CXCL11	9606.ENSP00000292301	9606.ENSP00000306884	0	0	0	0	0.067	0	0.65	0.853	0.948
CCR2	CXCR4	9606.ENSP00000292301	9606.ENSP00000386884	0	0	0	0.826	0.122	0	0.5	0.978	0.989
CCR2	CCR5	9606.ENSP00000292301	9606.ENSP00000292303	0	0	0.057	0.967	0.334	0	0.5	0.983	0.993
CCR2	CXCL10	9606.ENSP00000292301	9606.ENSP00000305651	0	0	0	0	0.139	0	0.65	0.995	0.998
CCR5	CD4	9606.ENSP00000292303	9606.ENSP00000011653	0	0	0	0	0.254	0.957	0	0.999	0.999
CCR5	TNFRSF1A	9606.ENSP00000292303	9606.ENSP00000162749	0	0	0	0	0.056	0	0	0.614	0.62
CCR5	TGFB1	9606.ENSP00000292303	9606.ENSP00000221930	0	0	0	0	0.059	0.069	0	0.505	0.528
CCR5	SPI1	9606.ENSP00000292303	9606.ENSP00000227163	0	0	0	0	0.321	0	0	0.227	0.453
CCR5	IL10RA	9606.ENSP00000292303	9606.ENSP00000227752	0	0	0	0	0.435	0	0	0.623	0.778
CCR5	CD68	9606.ENSP00000292303	9606.ENSP00000250092	0	0	0	0	0.15	0	0	0.781	0.806
CCR5	TLR2	9606.ENSP00000292303	9606.ENSP00000260010	0	0	0	0	0.276	0	0	0.575	0.679
CCR5	CD33	9606.ENSP00000292303	9606.ENSP00000262262	0	0	0	0	0.099	0.098	0	0.394	0.464
CCR5	IL1B	9606.ENSP00000292303	9606.ENSP00000263341	0	0	0	0	0.165	0	0	0.8	0.826
CCR5	STAT3	9606.ENSP00000292303	9606.ENSP00000264657	0	0	0	0	0.054	0.292	0.5	0.526	0.82
CCR5	ICAM1	9606.ENSP00000292303	9606.ENSP00000264832	0	0	0	0	0.115	0	0	0.598	0.629
CCR5	IRF8	9606.ENSP00000292303	9606.ENSP00000268638	0	0	0	0	0.268	0	0	0.348	0.502
CCR5	CSF1R	9606.ENSP00000292303	9606.ENSP00000286301	0	0	0	0	0.389	0	0	0.667	0.788
CCR5	IL1R1	9606.ENSP00000292303	9606.ENSP00000386380	0	0	0	0	0.073	0	0	0.417	0.436
CCR5	IL6R	9606.ENSP00000292303	9606.ENSP00000357470	0	0	0	0	0.109	0	0	0.396	0.438
CCR5	NLRP3	9606.ENSP00000292303	9606.ENSP00000337383	0	0	0	0	0.18	0	0	0.349	0.443
CCR5	TREM2	9606.ENSP00000292303	9606.ENSP00000362205	0	0	0	0	0.229	0	0	0.323	0.456
CCR5	CYBB	9606.ENSP00000292303	9606.ENSP00000367851	0	0	0	0	0.28	0	0	0.304	0.477
CCR5	RELA	9606.ENSP00000292303	9606.ENSP00000384273	0	0	0	0	0	0.049	0	0.505	0.509
CCR5	IL13RA1	9606.ENSP00000292303	9606.ENSP00000360730	0	0	0	0	0.07	0	0	0.505	0.52
CCR5	PECAM1	9606.ENSP00000292303	9606.ENSP00000457421	0	0	0	0	0.235	0.091	0	0.397	0.544
CCR5	FAS	9606.ENSP00000292303	9606.ENSP00000498466	0	0	0	0	0.072	0	0	0.541	0.555
CCR5	ITGAL	9606.ENSP00000292303	9606.ENSP00000349252	0	0	0	0	0.157	0	0	0.507	0.566
CCR5	MYD88	9606.ENSP00000292303	9606.ENSP00000498321	0	0	0	0	0.076	0	0	0.597	0.611
CCR5	FN1	9606.ENSP00000292303	9606.ENSP00000346839	0	0	0	0	0.044	0	0	0.619	0.62
CCR5	FASLG	9606.ENSP00000292303	9606.ENSP00000356694	0	0	0	0	0.294	0	0	0.507	0.637
CCR5	TNFRSF1B	9606.ENSP00000292303	9606.ENSP00000365435	0	0	0	0	0.164	0	0.4	0.352	0.646
CCR5	CSF1	9606.ENSP00000292303	9606.ENSP00000327513	0	0	0	0	0.058	0	0	0.684	0.689
CCR5	CD44	9606.ENSP00000292303	9606.ENSP00000398632	0	0	0	0	0.085	0	0	0.69	0.704
CCR5	STAT1	9606.ENSP00000292303	9606.ENSP00000354394	0	0	0	0	0.104	0	0	0.69	0.71
CCR5	CD40	9606.ENSP00000292303	9606.ENSP00000361359	0	0	0	0	0.072	0	0	0.743	0.751
CCR5	ITGAX	9606.ENSP00000292303	9606.ENSP00000454623	0	0	0	0	0.223	0	0	0.728	0.78
CCR5	TLR4	9606.ENSP00000292303	9606.ENSP00000363089	0	0	0	0	0.227	0	0	0.737	0.788
CCR5	CX3CR1	9606.ENSP00000292303	9606.ENSP00000351059	0	0	0.08	0.886	0.138	0	0.5	0.607	0.823
CCR5	ITGAM	9606.ENSP00000292303	9606.ENSP00000496959	0	0	0	0	0.335	0	0	0.769	0.84
CCR5	TNF	9606.ENSP00000292303	9606.ENSP00000398698	0	0	0	0	0.162	0	0	0.863	0.88
CCR5	CD8A	9606.ENSP00000292303	9606.ENSP00000386559	0	0	0	0	0.273	0	0	0.923	0.941
CCR5	CXCL16	9606.ENSP00000292303	9606.ENSP00000293778	0	0	0	0	0.087	0	0.65	0.839	0.944
CCR5	CXCL11	9606.ENSP00000292303	9606.ENSP00000306884	0	0	0	0	0.206	0	0.65	0.97	0.99
CCR5	CXCR4	9606.ENSP00000292303	9606.ENSP00000386884	0	0	0	0.813	0.101	0.628	0.5	0.984	0.996
CCR5	CXCL10	9606.ENSP00000292303	9606.ENSP00000305651	0	0	0	0	0.209	0	0.65	0.997	0.999
CD14	SPI1	9606.ENSP00000385519	9606.ENSP00000227163	0	0	0	0	0.335	0	0.9	0.108	0.935
CD14	CD68	9606.ENSP00000385519	9606.ENSP00000250092	0	0	0	0	0.222	0	0	0.32	0.449
CD14	TLR2	9606.ENSP00000385519	9606.ENSP00000260010	0	0	0	0	0.485	0.541	0.9	0.706	0.992
CD14	CD33	9606.ENSP00000385519	9606.ENSP00000262262	0	0	0	0	0.129	0.201	0	0.266	0.444
CD14	IL1B	9606.ENSP00000385519	9606.ENSP00000263341	0	0	0	0	0.196	0	0	0.36	0.463
CD14	CSF1R	9606.ENSP00000385519	9606.ENSP00000286301	0	0	0	0	0.767	0	0	0.192	0.803
CD14	STAB1	9606.ENSP00000385519	9606.ENSP00000312946	0	0	0	0	0.393	0	0	0.107	0.435
CD14	MARCO	9606.ENSP00000385519	9606.ENSP00000318916	0	0	0	0	0.339	0	0	0.167	0.425
CD14	TLR4	9606.ENSP00000385519	9606.ENSP00000363089	0	0	0	0	0.345	0	0.9	0.939	0.995
CD14	TNFRSF1B	9606.ENSP00000385519	9606.ENSP00000365435	0	0	0	0	0.305	0.079	0	0.159	0.414
CD14	ITGAM	9606.ENSP00000385519	9606.ENSP00000496959	0	0	0	0	0.338	0	0.5	0.308	0.75
CD33	CD4	9606.ENSP00000262262	9606.ENSP00000011653	0	0	0	0	0.126	0.126	0	0.843	0.869
CD33	TGFB1	9606.ENSP00000262262	9606.ENSP00000221930	0	0	0	0	0.056	0	0	0.574	0.58
CD33	SPI1	9606.ENSP00000262262	9606.ENSP00000227163	0	0	0	0	0.22	0.044	0	0.431	0.538
CD33	CD68	9606.ENSP00000262262	9606.ENSP00000250092	0	0	0.212	0	0.146	0	0	0.61	0.714
CD33	TLR2	9606.ENSP00000262262	9606.ENSP00000260010	0	0	0	0	0.111	0.095	0	0.37	0.449
CD33	ENG	9606.ENSP00000262262	9606.ENSP00000362299	0	0	0	0	0.068	0	0	0.399	0.415
CD33	CYBB	9606.ENSP00000262262	9606.ENSP00000367851	0	0	0	0	0.205	0	0	0.296	0.416
CD33	TMEM119	9606.ENSP00000262262	9606.ENSP00000376553	0	0	0	0	0	0	0	0.419	0.419
CD33	IRF8	9606.ENSP00000262262	9606.ENSP00000268638	0	0	0	0	0.109	0	0	0.402	0.444
CD33	ICAM1	9606.ENSP00000262262	9606.ENSP00000264832	0	0	0	0	0.068	0	0	0.455	0.47
CD33	STAT3	9606.ENSP00000262262	9606.ENSP00000264657	0	0	0	0	0.045	0	0	0.469	0.471
CD33	CSF1	9606.ENSP00000262262	9606.ENSP00000327513	0	0	0	0	0.042	0	0	0.473	0.473
CD33	CD9	9606.ENSP00000262262	9606.ENSP00000371958	0	0	0	0	0	0.126	0	0.448	0.496
CD33	IL4R	9606.ENSP00000262262	9606.ENSP00000379111	0	0	0	0	0	0.102	0	0.472	0.505
CD33	PECAM1	9606.ENSP00000262262	9606.ENSP00000457421	0	0	0	0	0.115	0.126	0	0.418	0.511
CD33	ITGAL	9606.ENSP00000262262	9606.ENSP00000349252	0	0	0	0	0.146	0.071	0	0.437	0.515
CD33	CD40	9606.ENSP00000262262	9606.ENSP00000361359	0	0	0	0	0	0	0	0.516	0.516
CD33	CD44	9606.ENSP00000262262	9606.ENSP00000398632	0	0	0	0	0.047	0	0	0.528	0.53
CD33	CXCR4	9606.ENSP00000262262	9606.ENSP00000386884	0	0	0	0	0.092	0.098	0	0.485	0.541
CD33	IL1B	9606.ENSP00000262262	9606.ENSP00000263341	0	0	0	0	0.108	0	0	0.507	0.541
CD33	CX3CR1	9606.ENSP00000262262	9606.ENSP00000351059	0	0	0	0	0.182	0.098	0	0.453	0.561
CD33	TNF	9606.ENSP00000262262	9606.ENSP00000398698	0	0	0	0	0.099	0	0	0.541	0.568
CD33	CSF1R	9606.ENSP00000262262	9606.ENSP00000286301	0	0	0	0	0.218	0.045	0	0.526	0.615
CD33	TLR4	9606.ENSP00000262262	9606.ENSP00000363089	0	0	0	0	0.121	0.095	0	0.625	0.675
CD33	ITGAX	9606.ENSP00000262262	9606.ENSP00000454623	0	0	0	0	0.135	0.071	0	0.669	0.711
CD33	CD8A	9606.ENSP00000262262	9606.ENSP00000386559	0	0	0	0	0.044	0	0	0.72	0.72
CD33	ITGAM	9606.ENSP00000262262	9606.ENSP00000496959	0	0	0	0	0.201	0.071	0	0.813	0.85
CD33	TREM2	9606.ENSP00000262262	9606.ENSP00000362205	0	0	0	0	0.072	0	0	0.953	0.954
CD4	MARCO	9606.ENSP00000011653	9606.ENSP00000318916	0	0	0	0	0.187	0.091	0	0.259	0.405
CD4	CDKN1A	9606.ENSP00000011653	9606.ENSP00000384849	0	0	0	0	0.059	0	0	0.398	0.409
CD4	TREM2	9606.ENSP00000011653	9606.ENSP00000362205	0	0	0	0	0.109	0	0	0.37	0.414
CD4	STAB1	9606.ENSP00000011653	9606.ENSP00000312946	0	0	0	0	0.18	0	0	0.317	0.416
CD4	SLC18A3	9606.ENSP00000011653	9606.ENSP00000363229	0	0	0	0	0	0	0.4	0.092	0.431
CD4	IL37	9606.ENSP00000011653	9606.ENSP00000263326	0	0	0	0	0	0	0	0.431	0.431
CD4	MMP12	9606.ENSP00000011653	9606.ENSP00000458585	0	0	0	0	0.044	0.092	0	0.399	0.432
CD4	PSMB8	9606.ENSP00000011653	9606.ENSP00000364016	0	0	0	0	0.072	0.045	0	0.417	0.438
CD4	P2RX7	9606.ENSP00000011653	9606.ENSP00000330696	0	0	0	0	0.114	0	0	0.398	0.444
CD4	LOX	9606.ENSP00000011653	9606.ENSP00000231004	0	0	0	0	0.042	0.107	0	0.473	0.509
CD4	FGF2	9606.ENSP00000011653	9606.ENSP00000264498	0	0	0	0	0	0	0	0.51	0.51
CD4	ENTPD2	9606.ENSP00000011653	9606.ENSP00000347213	0	0	0	0	0.042	0	0	0.512	0.512
CD4	GFAP	9606.ENSP00000011653	9606.ENSP00000253408	0	0	0	0	0.042	0.11	0	0.479	0.517
CD4	MMP2	9606.ENSP00000011653	9606.ENSP00000219070	0	0	0	0	0.06	0.092	0	0.48	0.517
CD4	HMOX1	9606.ENSP00000011653	9606.ENSP00000216117	0	0	0	0	0.06	0	0	0.509	0.519
CD4	PSMB9	9606.ENSP00000011653	9606.ENSP00000363993	0	0	0	0	0.074	0	0	0.505	0.522
CD4	SLC2A1	9606.ENSP00000011653	9606.ENSP00000416293	0	0	0	0	0	0.091	0	0.517	0.542
CD4	IL13RA1	9606.ENSP00000011653	9606.ENSP00000360730	0	0	0.228	0	0	0	0	0.435	0.545
CD4	RELA	9606.ENSP00000011653	9606.ENSP00000384273	0	0	0	0	0.043	0.107	0	0.512	0.546
CD4	TGFBR2	9606.ENSP00000011653	9606.ENSP00000351905	0	0	0	0	0.062	0.081	0	0.517	0.547
CD4	CYBB	9606.ENSP00000011653	9606.ENSP00000367851	0	0	0	0	0.181	0	0	0.48	0.555
CD4	CXCL16	9606.ENSP00000011653	9606.ENSP00000293778	0	0	0	0	0.072	0	0	0.542	0.556
CD4	LTBR	9606.ENSP00000011653	9606.ENSP00000228918	0	0	0	0	0.05	0	0	0.555	0.56
CD4	HGF	9606.ENSP00000011653	9606.ENSP00000222390	0	0	0	0	0.086	0.113	0	0.506	0.565
CD4	ENG	9606.ENSP00000011653	9606.ENSP00000362299	0	0	0	0	0.102	0	0	0.541	0.57
CD4	NOS2	9606.ENSP00000011653	9606.ENSP00000327251	0	0	0	0	0	0	0	0.585	0.585
CD4	IL15RA	9606.ENSP00000011653	9606.ENSP00000380421	0	0	0	0	0.058	0	0	0.581	0.588
CD4	TNFRSF1B	9606.ENSP00000011653	9606.ENSP00000365435	0	0	0	0	0.124	0	0	0.578	0.614
CD4	PTGS2	9606.ENSP00000011653	9606.ENSP00000356438	0	0	0	0	0.061	0	0	0.607	0.615
CD4	NFKBIA	9606.ENSP00000011653	9606.ENSP00000216797	0	0	0	0	0.062	0.093	0	0.587	0.618
CD4	ICAM2	9606.ENSP00000011653	9606.ENSP00000415283	0	0	0.332	0	0.068	0	0	0.447	0.625
CD4	NLRP3	9606.ENSP00000011653	9606.ENSP00000337383	0	0	0	0	0.109	0.1	0	0.598	0.65
CD4	IRF8	9606.ENSP00000011653	9606.ENSP00000268638	0	0	0	0	0.187	0.067	0	0.585	0.658
CD4	MYC	9606.ENSP00000011653	9606.ENSP00000478887	0	0	0	0	0.056	0	0	0.658	0.663
CD4	CSF1	9606.ENSP00000011653	9606.ENSP00000327513	0	0	0	0	0.049	0	0	0.667	0.67
CD4	IL6R	9606.ENSP00000011653	9606.ENSP00000357470	0	0	0	0	0.147	0	0	0.629	0.67
CD4	SPI1	9606.ENSP00000011653	9606.ENSP00000227163	0	0	0	0	0.302	0	0	0.582	0.696
CD4	IL10RA	9606.ENSP00000011653	9606.ENSP00000227752	0	0	0	0	0.253	0	0	0.625	0.708
CD4	IL1R1	9606.ENSP00000011653	9606.ENSP00000386380	0	0	0	0	0.045	0	0	0.742	0.743
CD4	PECAM1	9606.ENSP00000011653	9606.ENSP00000457421	0	0	0	0	0.137	0	0	0.718	0.746
CD4	CSF1R	9606.ENSP00000011653	9606.ENSP00000286301	0	0	0	0	0.293	0.045	0	0.666	0.755
CD4	CXCL11	9606.ENSP00000011653	9606.ENSP00000306884	0	0	0	0	0.05	0	0	0.766	0.769
CD4	CX3CR1	9606.ENSP00000011653	9606.ENSP00000351059	0	0	0	0	0.177	0.091	0	0.717	0.77
CD4	IL4R	9606.ENSP00000011653	9606.ENSP00000379111	0	0	0	0	0.079	0.081	0	0.762	0.78
CD4	TNFRSF1A	9606.ENSP00000011653	9606.ENSP00000162749	0	0	0	0	0.086	0	0	0.787	0.797
CD4	TLR2	9606.ENSP00000011653	9606.ENSP00000260010	0	0	0	0	0.141	0.097	0	0.779	0.814
CD4	CD9	9606.ENSP00000011653	9606.ENSP00000371958	0	0	0	0	0	0.113	0	0.815	0.829
CD4	CXCL10	9606.ENSP00000011653	9606.ENSP00000305651	0	0	0	0	0.09	0	0	0.83	0.839
CD4	FAS	9606.ENSP00000011653	9606.ENSP00000498466	0	0	0	0	0.044	0	0	0.84	0.84
CD4	MYD88	9606.ENSP00000011653	9606.ENSP00000498321	0	0	0	0	0.067	0.069	0	0.842	0.85
CD4	ITGAL	9606.ENSP00000011653	9606.ENSP00000349252	0	0	0	0	0.244	0.067	0	0.816	0.859
CD4	FASLG	9606.ENSP00000011653	9606.ENSP00000356694	0	0	0	0	0.063	0	0	0.865	0.868
CD4	TGFB1	9606.ENSP00000011653	9606.ENSP00000221930	0	0	0	0	0.072	0	0	0.866	0.87
CD4	STAT1	9606.ENSP00000011653	9606.ENSP00000354394	0	0	0	0	0.074	0.091	0	0.881	0.891
CD4	STAT3	9606.ENSP00000011653	9606.ENSP00000264657	0	0	0	0	0.073	0.091	0	0.882	0.892
CD4	CD68	9606.ENSP00000011653	9606.ENSP00000250092	0	0	0	0	0.127	0	0	0.888	0.898
CD4	TLR4	9606.ENSP00000011653	9606.ENSP00000363089	0	0	0	0	0.128	0.097	0	0.886	0.902
CD4	FN1	9606.ENSP00000011653	9606.ENSP00000346839	0	0	0	0	0	0.092	0	0.912	0.916
CD4	CD40	9606.ENSP00000011653	9606.ENSP00000361359	0	0	0	0	0.059	0	0	0.923	0.924
CD4	ITGAM	9606.ENSP00000011653	9606.ENSP00000496959	0	0	0	0	0.218	0.067	0	0.929	0.943
CD4	ITGAX	9606.ENSP00000011653	9606.ENSP00000454623	0	0	0	0	0.162	0.067	0	0.941	0.949
CD4	CD44	9606.ENSP00000011653	9606.ENSP00000398632	0	0	0	0	0.055	0	0	0.949	0.95
CD4	IL1B	9606.ENSP00000011653	9606.ENSP00000263341	0	0	0.238	0	0.108	0	0	0.944	0.958
CD4	TNF	9606.ENSP00000011653	9606.ENSP00000398698	0	0	0	0	0.092	0	0	0.966	0.968
CD4	ICAM1	9606.ENSP00000011653	9606.ENSP00000264832	0	0	0	0	0.062	0	0	0.968	0.969
CD4	CD8A	9606.ENSP00000011653	9606.ENSP00000386559	0	0	0	0	0.13	0.098	0.9	0.993	0.999
CD4	CXCR4	9606.ENSP00000011653	9606.ENSP00000386884	0	0	0	0	0.083	0.535	0	0.999	0.999
CD40	TNFRSF1A	9606.ENSP00000361359	9606.ENSP00000162749	0	0	0	0	0.101	0	0	0.914	0.919
CD40	NFKBIA	9606.ENSP00000361359	9606.ENSP00000216797	0	0	0	0	0.12	0	0	0.806	0.822
CD40	TGFB1	9606.ENSP00000361359	9606.ENSP00000221930	0	0	0	0	0.145	0	0	0.59	0.634
CD40	SPI1	9606.ENSP00000361359	9606.ENSP00000227163	0	0	0	0	0.15	0	0	0.408	0.476
CD40	IL10RA	9606.ENSP00000361359	9606.ENSP00000227752	0	0	0	0	0.151	0	0	0.446	0.509
CD40	LTBR	9606.ENSP00000361359	9606.ENSP00000228918	0	0	0	0.718	0.042	0	0.5	0.521	0.75
CD40	CD68	9606.ENSP00000361359	9606.ENSP00000250092	0	0	0	0	0.184	0	0	0.581	0.643
CD40	TLR2	9606.ENSP00000361359	9606.ENSP00000260010	0	0	0	0	0.11	0	0	0.904	0.911
CD40	IL1B	9606.ENSP00000361359	9606.ENSP00000263341	0	0	0	0	0.133	0	0	0.944	0.949
CD40	STAT3	9606.ENSP00000361359	9606.ENSP00000264657	0	0	0	0	0.101	0	0	0.61	0.634
CD40	ICAM1	9606.ENSP00000361359	9606.ENSP00000264832	0	0	0	0	0.213	0	0	0.967	0.972
CD40	IRF8	9606.ENSP00000361359	9606.ENSP00000268638	0	0	0	0	0.214	0	0	0.506	0.595
CD40	CSF1R	9606.ENSP00000361359	9606.ENSP00000286301	0	0	0	0	0.092	0	0	0.601	0.623
CD40	CXCL16	9606.ENSP00000361359	9606.ENSP00000293778	0	0	0	0	0.118	0	0	0.37	0.42
CD40	CXCL10	9606.ENSP00000361359	9606.ENSP00000305651	0	0	0	0	0.192	0	0	0.644	0.7
CD40	CXCL11	9606.ENSP00000361359	9606.ENSP00000306884	0	0	0	0	0.16	0	0	0.47	0.535
CD40	NOS2	9606.ENSP00000361359	9606.ENSP00000327251	0	0	0	0	0.055	0	0	0.446	0.454
CD40	CSF1	9606.ENSP00000361359	9606.ENSP00000327513	0	0	0	0	0.081	0	0	0.581	0.598
CD40	NLRP3	9606.ENSP00000361359	9606.ENSP00000337383	0	0	0	0	0.056	0	0	0.395	0.404
CD40	FN1	9606.ENSP00000361359	9606.ENSP00000346839	0	0	0	0	0.042	0	0	0.431	0.431
CD40	ITGAL	9606.ENSP00000361359	9606.ENSP00000349252	0	0	0	0	0.077	0	0	0.71	0.721
CD40	CX3CR1	9606.ENSP00000361359	9606.ENSP00000351059	0	0	0	0	0	0	0	0.512	0.512
CD40	TGFBR2	9606.ENSP00000361359	9606.ENSP00000351905	0	0	0	0	0.044	0.044	0	0.562	0.565
CD40	STAT1	9606.ENSP00000361359	9606.ENSP00000354394	0	0	0	0	0.119	0	0	0.737	0.758
CD40	PTGS2	9606.ENSP00000361359	9606.ENSP00000356438	0	0	0	0	0	0	0	0.447	0.447
CD40	FASLG	9606.ENSP00000361359	9606.ENSP00000356694	0	0	0	0	0.049	0	0	0.949	0.95
CD40	IL6R	9606.ENSP00000361359	9606.ENSP00000357470	0	0	0	0	0.045	0	0	0.443	0.445
CD40	CYBB	9606.ENSP00000361359	9606.ENSP00000367851	0	0	0	0	0.085	0	0	0.378	0.407
CD40	CD9	9606.ENSP00000361359	9606.ENSP00000371958	0	0	0	0	0	0	0	0.447	0.447
CD40	IL15RA	9606.ENSP00000361359	9606.ENSP00000380421	0	0	0	0	0.138	0	0	0.418	0.476
CD40	MYC	9606.ENSP00000361359	9606.ENSP00000478887	0	0	0	0	0.051	0	0	0.475	0.48
CD40	ENG	9606.ENSP00000361359	9606.ENSP00000362299	0	0	0	0	0.07	0	0	0.472	0.487
CD40	PSMB8	9606.ENSP00000361359	9606.ENSP00000364016	0	0	0	0	0.132	0	0.4	0.275	0.589
CD40	PSMB9	9606.ENSP00000361359	9606.ENSP00000363993	0	0	0	0	0.141	0	0.4	0.388	0.657
CD40	PECAM1	9606.ENSP00000361359	9606.ENSP00000457421	0	0	0	0	0.067	0	0	0.657	0.666
CD40	IL1R1	9606.ENSP00000361359	9606.ENSP00000386380	0	0	0	0	0.042	0	0	0.667	0.667
CD40	CXCR4	9606.ENSP00000361359	9606.ENSP00000386884	0	0	0	0	0.091	0	0	0.736	0.75
CD40	ICAM2	9606.ENSP00000361359	9606.ENSP00000415283	0	0	0	0	0.089	0	0	0.739	0.752
CD40	TNFRSF1B	9606.ENSP00000361359	9606.ENSP00000365435	0	0	0.091	0.707	0.098	0	0.5	0.521	0.777
CD40	ITGAM	9606.ENSP00000361359	9606.ENSP00000496959	0	0	0	0	0.087	0	0	0.773	0.784
CD40	IL4R	9606.ENSP00000361359	9606.ENSP00000379111	0	0	0	0	0.083	0.294	0	0.702	0.79
CD40	CD44	9606.ENSP00000361359	9606.ENSP00000398632	0	0	0	0	0.076	0	0	0.783	0.791
CD40	FAS	9606.ENSP00000361359	9606.ENSP00000498466	0	0	0	0	0.138	0	0	0.85	0.865
CD40	ITGAX	9606.ENSP00000361359	9606.ENSP00000454623	0	0	0	0	0.082	0	0	0.872	0.877
CD40	CD8A	9606.ENSP00000361359	9606.ENSP00000386559	0	0	0	0	0.056	0	0	0.914	0.915
CD40	TLR4	9606.ENSP00000361359	9606.ENSP00000363089	0	0	0	0	0.075	0	0	0.915	0.918
CD40	MYD88	9606.ENSP00000361359	9606.ENSP00000498321	0	0	0	0	0.108	0	0	0.916	0.922
CD40	RELA	9606.ENSP00000361359	9606.ENSP00000384273	0	0	0	0	0.071	0	0	0.991	0.991
CD40	TNF	9606.ENSP00000361359	9606.ENSP00000398698	0	0	0	0	0.135	0	0.5	0.984	0.992
CD44	TNFRSF1A	9606.ENSP00000398632	9606.ENSP00000162749	0	0	0	0	0.083	0	0	0.418	0.443
CD44	NFKBIA	9606.ENSP00000398632	9606.ENSP00000216797	0	0	0	0	0.085	0	0	0.426	0.453
CD44	MMP2	9606.ENSP00000398632	9606.ENSP00000219070	0	0	0	0	0.08	0	0.5	0.942	0.971
CD44	TGFB1	9606.ENSP00000398632	9606.ENSP00000221930	0	0	0	0	0.157	0	0	0.712	0.747
CD44	HGF	9606.ENSP00000398632	9606.ENSP00000222390	0	0	0	0	0.07	0.363	0	0.945	0.964
CD44	SPI1	9606.ENSP00000398632	9606.ENSP00000227163	0	0	0	0	0.062	0	0	0.56	0.569
CD44	LOX	9606.ENSP00000398632	9606.ENSP00000231004	0	0	0	0	0.107	0	0	0.49	0.525
CD44	CD68	9606.ENSP00000398632	9606.ENSP00000250092	0	0	0	0	0.128	0	0	0.679	0.708
CD44	GFAP	9606.ENSP00000398632	9606.ENSP00000253408	0	0	0	0	0.059	0	0	0.569	0.577
CD44	TLR2	9606.ENSP00000398632	9606.ENSP00000260010	0	0	0	0	0.155	0	0	0.858	0.874
CD44	FLT4	9606.ENSP00000398632	9606.ENSP00000261937	0	0	0	0	0.06	0	0	0.619	0.626
CD44	IL1B	9606.ENSP00000398632	9606.ENSP00000263341	0	0	0	0	0.11	0	0	0.684	0.707
CD44	FGF2	9606.ENSP00000398632	9606.ENSP00000264498	0	0	0	0	0.048	0.327	0	0.991	0.993
CD44	STAT3	9606.ENSP00000398632	9606.ENSP00000264657	0	0	0	0	0.098	0.292	0	0.715	0.802
CD44	ICAM1	9606.ENSP00000398632	9606.ENSP00000264832	0	0	0	0	0.148	0	0	0.995	0.995
CD44	CSF1R	9606.ENSP00000398632	9606.ENSP00000286301	0	0	0	0	0.093	0	0	0.491	0.519
CD44	ITGA5	9606.ENSP00000398632	9606.ENSP00000293379	0	0	0	0	0.162	0	0	0.753	0.785
CD44	CXCL10	9606.ENSP00000398632	9606.ENSP00000305651	0	0	0	0	0.062	0	0	0.569	0.578
CD44	CXCL11	9606.ENSP00000398632	9606.ENSP00000306884	0	0	0	0	0	0	0	0.574	0.574
CD44	MMP14	9606.ENSP00000398632	9606.ENSP00000308208	0	0	0	0	0.126	0	0	0.912	0.919
CD44	CSF1	9606.ENSP00000398632	9606.ENSP00000327513	0	0	0	0	0.147	0	0	0.491	0.547
CD44	FN1	9606.ENSP00000398632	9606.ENSP00000346839	0	0	0	0	0.073	0.292	0.9	0.996	0.999
CD44	ITGAL	9606.ENSP00000398632	9606.ENSP00000349252	0	0	0	0	0.063	0	0	0.811	0.815
CD44	CX3CR1	9606.ENSP00000398632	9606.ENSP00000351059	0	0	0	0	0.059	0	0	0.47	0.48
CD44	TGFBR2	9606.ENSP00000398632	9606.ENSP00000351905	0	0	0	0	0.172	0	0	0.594	0.649
CD44	MSN	9606.ENSP00000398632	9606.ENSP00000353408	0	0	0	0	0.255	0.52	0	0.992	0.996
CD44	STAT1	9606.ENSP00000398632	9606.ENSP00000354394	0	0	0	0	0.086	0	0.5	0.682	0.842
CD44	PTGS2	9606.ENSP00000398632	9606.ENSP00000356438	0	0	0	0	0.166	0	0	0.519	0.582
CD44	FASLG	9606.ENSP00000398632	9606.ENSP00000356694	0	0	0	0	0.086	0	0	0.582	0.602
CD44	IL6R	9606.ENSP00000398632	9606.ENSP00000357470	0	0	0	0	0.06	0	0	0.432	0.443
CD44	ENG	9606.ENSP00000398632	9606.ENSP00000362299	0	0	0	0	0.101	0	0	0.889	0.896
CD44	TLR4	9606.ENSP00000398632	9606.ENSP00000363089	0	0	0	0	0.128	0	0	0.982	0.983
CD44	CD9	9606.ENSP00000398632	9606.ENSP00000371958	0	0	0	0	0.12	0.51	0	0.968	0.985
CD44	IL4R	9606.ENSP00000398632	9606.ENSP00000379111	0	0	0	0	0.109	0	0	0.394	0.436
CD44	NFE2L2	9606.ENSP00000398632	9606.ENSP00000380252	0	0	0	0	0.074	0	0	0.392	0.413
CD44	IL15RA	9606.ENSP00000398632	9606.ENSP00000380421	0	0	0	0	0.086	0	0	0.624	0.641
CD44	CSF2RB	9606.ENSP00000398632	9606.ENSP00000384053	0	0	0.264	0	0.127	0	0	0.175	0.423
CD44	CDKN1A	9606.ENSP00000398632	9606.ENSP00000384849	0	0	0	0	0.084	0	0	0.471	0.494
CD44	IL1R1	9606.ENSP00000398632	9606.ENSP00000386380	0	0	0	0	0.117	0	0	0.379	0.428
CD44	CD8A	9606.ENSP00000398632	9606.ENSP00000386559	0	0	0	0	0.086	0	0	0.935	0.938
CD44	CXCR4	9606.ENSP00000398632	9606.ENSP00000386884	0	0	0	0	0.106	0	0	0.994	0.994
CD44	SLC2A1	9606.ENSP00000398632	9606.ENSP00000416293	0	0	0	0	0.045	0	0	0.432	0.434
CD44	LSR	9606.ENSP00000398632	9606.ENSP00000480821	0	0	0	0	0.042	0	0	0.493	0.494
CD44	MYD88	9606.ENSP00000398632	9606.ENSP00000498321	0	0	0	0	0.072	0	0	0.641	0.652
CD44	FAS	9606.ENSP00000398632	9606.ENSP00000498466	0	0	0.284	0	0.139	0	0	0.583	0.721
CD44	MYC	9606.ENSP00000398632	9606.ENSP00000478887	0	0	0	0	0.067	0.161	0	0.732	0.772
CD44	TNF	9606.ENSP00000398632	9606.ENSP00000398698	0	0	0	0	0.098	0	0	0.811	0.822
CD44	ITGAX	9606.ENSP00000398632	9606.ENSP00000454623	0	0	0	0	0.154	0	0	0.811	0.833
CD44	ICAM2	9606.ENSP00000398632	9606.ENSP00000415283	0	0	0	0	0.096	0	0	0.842	0.851
CD44	ITGAM	9606.ENSP00000398632	9606.ENSP00000496959	0	0	0	0	0.14	0	0	0.844	0.86
CD44	PECAM1	9606.ENSP00000398632	9606.ENSP00000457421	0	0	0	0	0.099	0	0	0.946	0.949
CD68	GRN	9606.ENSP00000250092	9606.ENSP00000053867	0	0	0	0	0.293	0.36	0	0.354	0.682
CD68	TNFRSF1A	9606.ENSP00000250092	9606.ENSP00000162749	0	0	0	0	0.147	0	0	0.37	0.439
CD68	HMOX1	9606.ENSP00000250092	9606.ENSP00000216117	0	0	0	0	0.209	0	0	0.494	0.583
CD68	NFKBIA	9606.ENSP00000250092	9606.ENSP00000216797	0	0	0	0	0.138	0.046	0	0.446	0.504
CD68	MMP2	9606.ENSP00000250092	9606.ENSP00000219070	0	0	0	0	0.07	0	0	0.479	0.495
CD68	TGFB1	9606.ENSP00000250092	9606.ENSP00000221930	0	0	0	0	0.163	0	0	0.756	0.787
CD68	SPI1	9606.ENSP00000250092	9606.ENSP00000227163	0	0	0	0	0.296	0	0	0.396	0.557
CD68	IL10RA	9606.ENSP00000250092	9606.ENSP00000227752	0	0	0	0	0.174	0	0	0.32	0.414
CD68	SLC11A1	9606.ENSP00000250092	9606.ENSP00000233202	0	0	0	0	0.341	0	0	0.198	0.449
CD68	MYC	9606.ENSP00000250092	9606.ENSP00000478887	0	0	0	0	0.083	0	0	0.375	0.402
CD68	CSF2RB	9606.ENSP00000250092	9606.ENSP00000384053	0	0	0.204	0	0.163	0	0	0.184	0.409
CD68	FASLG	9606.ENSP00000250092	9606.ENSP00000356694	0	0	0	0	0.053	0	0	0.404	0.411
CD68	CD9	9606.ENSP00000250092	9606.ENSP00000371958	0	0	0	0	0.042	0	0	0.411	0.412
CD68	IL1R1	9606.ENSP00000250092	9606.ENSP00000386380	0	0	0	0	0.08	0	0	0.395	0.419
CD68	DCX	9606.ENSP00000250092	9606.ENSP00000490614	0	0	0	0	0	0	0	0.423	0.423
CD68	TH	9606.ENSP00000250092	9606.ENSP00000370571	0	0	0	0	0.055	0	0	0.425	0.434
CD68	IL4R	9606.ENSP00000250092	9606.ENSP00000379111	0	0	0	0	0.109	0	0	0.396	0.439
CD68	MARCO	9606.ENSP00000250092	9606.ENSP00000318916	0	0	0	0	0.149	0	0	0.377	0.447
CD68	CXCL11	9606.ENSP00000250092	9606.ENSP00000306884	0	0	0	0	0.106	0	0	0.416	0.455
CD68	IRF8	9606.ENSP00000250092	9606.ENSP00000268638	0	0	0	0	0.181	0	0	0.373	0.465
CD68	ITGAL	9606.ENSP00000250092	9606.ENSP00000349252	0	0	0	0	0.187	0	0	0.369	0.465
CD68	STAB1	9606.ENSP00000250092	9606.ENSP00000312946	0	0	0	0	0.125	0	0	0.44	0.489
CD68	NLRP3	9606.ENSP00000250092	9606.ENSP00000337383	0	0	0	0	0.102	0	0	0.459	0.494
CD68	CXCL16	9606.ENSP00000250092	9606.ENSP00000293778	0	0	0	0	0.194	0	0	0.4	0.496
CD68	FGF2	9606.ENSP00000250092	9606.ENSP00000264498	0	0	0	0	0.067	0	0	0.489	0.503
CD68	MYD88	9606.ENSP00000250092	9606.ENSP00000498321	0	0	0	0	0.14	0	0	0.46	0.516
CD68	STAT1	9606.ENSP00000250092	9606.ENSP00000354394	0	0	0	0	0.11	0	0	0.496	0.533
CD68	NFE2L2	9606.ENSP00000250092	9606.ENSP00000380252	0	0	0	0	0.104	0	0	0.501	0.534
CD68	NCF1	9606.ENSP00000250092	9606.ENSP00000289473	0	0	0	0	0.164	0	0	0.47	0.539
CD68	CXCR4	9606.ENSP00000250092	9606.ENSP00000386884	0	0	0	0	0.105	0	0	0.532	0.563
CD68	NOS2	9606.ENSP00000250092	9606.ENSP00000327251	0	0	0	0	0	0	0	0.568	0.568
CD68	FN1	9606.ENSP00000250092	9606.ENSP00000346839	0	0	0	0	0.06	0	0	0.57	0.578
CD68	PTGS2	9606.ENSP00000250092	9606.ENSP00000356438	0	0	0	0	0.11	0	0	0.55	0.582
CD68	TSPO	9606.ENSP00000250092	9606.ENSP00000379563	0	0	0	0	0.086	0	0	0.574	0.594
CD68	STAT3	9606.ENSP00000250092	9606.ENSP00000264657	0	0	0	0	0.107	0	0	0.588	0.617
CD68	CYBB	9606.ENSP00000250092	9606.ENSP00000367851	0	0	0	0	0.233	0	0	0.529	0.624
CD68	TMEM119	9606.ENSP00000250092	9606.ENSP00000376553	0	0	0	0	0.047	0	0	0.637	0.639
CD68	ENG	9606.ENSP00000250092	9606.ENSP00000362299	0	0	0	0	0.104	0	0	0.62	0.644
CD68	TLR2	9606.ENSP00000250092	9606.ENSP00000260010	0	0	0	0	0.178	0	0	0.588	0.647
CD68	MMP12	9606.ENSP00000250092	9606.ENSP00000458585	0	0	0	0	0.14	0	0	0.647	0.683
CD68	ICAM1	9606.ENSP00000250092	9606.ENSP00000264832	0	0	0	0	0.167	0	0	0.647	0.693
CD68	CSF1	9606.ENSP00000250092	9606.ENSP00000327513	0	0	0	0	0.13	0	0	0.695	0.723
CD68	TLR4	9606.ENSP00000250092	9606.ENSP00000363089	0	0	0	0	0.157	0	0	0.688	0.726
CD68	CXCL10	9606.ENSP00000250092	9606.ENSP00000305651	0	0	0	0	0.084	0	0	0.719	0.732
CD68	CX3CR1	9606.ENSP00000250092	9606.ENSP00000351059	0	0	0	0	0.076	0	0	0.741	0.75
CD68	CSF1R	9606.ENSP00000250092	9606.ENSP00000286301	0	0	0	0	0.294	0	0	0.717	0.792
CD68	TREM2	9606.ENSP00000250092	9606.ENSP00000362205	0	0	0	0	0.272	0	0	0.743	0.805
CD68	PECAM1	9606.ENSP00000250092	9606.ENSP00000457421	0	0	0	0	0.164	0	0	0.797	0.823
CD68	ITGAX	9606.ENSP00000250092	9606.ENSP00000454623	0	0	0	0	0.27	0	0	0.771	0.826
CD68	IL1B	9606.ENSP00000250092	9606.ENSP00000263341	0	0	0	0	0.168	0	0	0.816	0.84
CD68	GFAP	9606.ENSP00000250092	9606.ENSP00000253408	0	0	0	0	0.074	0	0	0.84	0.846
CD68	TNF	9606.ENSP00000250092	9606.ENSP00000398698	0	0	0	0	0.143	0	0	0.844	0.86
CD68	CD8A	9606.ENSP00000250092	9606.ENSP00000386559	0	0	0	0	0.089	0	0	0.888	0.893
CD68	ITGAM	9606.ENSP00000250092	9606.ENSP00000496959	0	0	0	0	0.222	0	0	0.872	0.896
CD8A	TNFRSF1A	9606.ENSP00000386559	9606.ENSP00000162749	0	0	0	0	0.044	0	0	0.766	0.766
CD8A	HMOX1	9606.ENSP00000386559	9606.ENSP00000216117	0	0	0	0	0.044	0	0	0.657	0.658
CD8A	NFKBIA	9606.ENSP00000386559	9606.ENSP00000216797	0	0	0	0	0.058	0	0	0.524	0.532
CD8A	MMP2	9606.ENSP00000386559	9606.ENSP00000219070	0	0	0	0	0	0	0	0.505	0.505
CD8A	TGFB1	9606.ENSP00000386559	9606.ENSP00000221930	0	0	0	0	0.042	0	0	0.796	0.796
CD8A	HGF	9606.ENSP00000386559	9606.ENSP00000222390	0	0	0	0	0	0	0	0.505	0.505
CD8A	SPI1	9606.ENSP00000386559	9606.ENSP00000227163	0	0	0	0	0.095	0	0	0.512	0.539
CD8A	IL10RA	9606.ENSP00000386559	9606.ENSP00000227752	0	0	0.259	0	0.341	0	0	0.571	0.772
CD8A	LTBR	9606.ENSP00000386559	9606.ENSP00000228918	0	0	0	0	0	0	0	0.507	0.507
CD8A	LOX	9606.ENSP00000386559	9606.ENSP00000231004	0	0	0	0	0	0	0	0.447	0.447
CD8A	GFAP	9606.ENSP00000386559	9606.ENSP00000253408	0	0	0	0	0	0	0	0.402	0.402
CD8A	TLR2	9606.ENSP00000386559	9606.ENSP00000260010	0	0	0	0	0.139	0	0	0.72	0.748
CD8A	IL1B	9606.ENSP00000386559	9606.ENSP00000263341	0	0	0	0	0.06	0	0	0.92	0.922
CD8A	FGF2	9606.ENSP00000386559	9606.ENSP00000264498	0	0	0	0	0	0	0	0.505	0.505
CD8A	STAT3	9606.ENSP00000386559	9606.ENSP00000264657	0	0	0	0	0.048	0	0	0.838	0.839
CD8A	ICAM1	9606.ENSP00000386559	9606.ENSP00000264832	0	0	0	0	0.044	0	0	0.842	0.842
CD8A	IRF8	9606.ENSP00000386559	9606.ENSP00000268638	0	0	0	0	0.179	0	0	0.591	0.65
CD8A	CSF1R	9606.ENSP00000386559	9606.ENSP00000286301	0	0	0	0	0.193	0	0	0.693	0.741
CD8A	CXCL16	9606.ENSP00000386559	9606.ENSP00000293778	0	0	0	0	0.058	0	0	0.58	0.587
CD8A	CXCL10	9606.ENSP00000386559	9606.ENSP00000305651	0	0	0	0	0.162	0	0	0.871	0.887
CD8A	CXCL11	9606.ENSP00000386559	9606.ENSP00000306884	0	0	0	0	0.126	0	0	0.781	0.8
CD8A	NOS2	9606.ENSP00000386559	9606.ENSP00000327251	0	0	0	0	0	0	0	0.541	0.541
CD8A	CSF1	9606.ENSP00000386559	9606.ENSP00000327513	0	0	0	0	0	0	0	0.665	0.665
CD8A	P2RX7	9606.ENSP00000386559	9606.ENSP00000330696	0	0	0	0	0.044	0	0	0.411	0.412
CD8A	NLRP3	9606.ENSP00000386559	9606.ENSP00000337383	0	0	0	0	0.128	0	0	0.582	0.619
CD8A	FN1	9606.ENSP00000386559	9606.ENSP00000346839	0	0	0	0	0	0	0	0.753	0.753
CD8A	ITGAL	9606.ENSP00000386559	9606.ENSP00000349252	0	0	0	0	0.285	0	0	0.798	0.849
CD8A	CX3CR1	9606.ENSP00000386559	9606.ENSP00000351059	0	0	0	0	0.138	0	0	0.67	0.703
CD8A	TGFBR2	9606.ENSP00000386559	9606.ENSP00000351905	0	0	0	0	0.062	0.045	0	0.507	0.519
CD8A	STAT1	9606.ENSP00000386559	9606.ENSP00000354394	0	0	0	0	0.099	0	0	0.826	0.836
CD8A	PTGS2	9606.ENSP00000386559	9606.ENSP00000356438	0	0	0	0	0	0	0	0.581	0.581
CD8A	FASLG	9606.ENSP00000386559	9606.ENSP00000356694	0	0	0	0	0.382	0	0	0.879	0.922
CD8A	IL6R	9606.ENSP00000386559	9606.ENSP00000357470	0	0	0	0	0.089	0	0	0.571	0.592
CD8A	ENG	9606.ENSP00000386559	9606.ENSP00000362299	0	0	0	0	0	0	0	0.506	0.506
CD8A	TLR4	9606.ENSP00000386559	9606.ENSP00000363089	0	0	0	0	0.093	0	0	0.839	0.847
CD8A	PSMB9	9606.ENSP00000386559	9606.ENSP00000363993	0	0	0	0	0.149	0	0	0.594	0.64
CD8A	PSMB8	9606.ENSP00000386559	9606.ENSP00000364016	0	0	0	0	0.123	0	0	0.529	0.569
CD8A	TNFRSF1B	9606.ENSP00000386559	9606.ENSP00000365435	0	0	0	0	0.086	0	0	0.527	0.549
CD8A	CYBB	9606.ENSP00000386559	9606.ENSP00000367851	0	0	0	0	0.109	0	0	0.505	0.54
CD8A	CD9	9606.ENSP00000386559	9606.ENSP00000371958	0	0	0	0	0	0	0	0.698	0.698
CD8A	IL4R	9606.ENSP00000386559	9606.ENSP00000379111	0	0	0	0	0.064	0.045	0	0.71	0.718
CD8A	IL15RA	9606.ENSP00000386559	9606.ENSP00000380421	0	0	0	0	0.067	0	0	0.78	0.785
CD8A	RELA	9606.ENSP00000386559	9606.ENSP00000384273	0	0	0	0	0.042	0	0	0.448	0.448
CD8A	IL1R1	9606.ENSP00000386559	9606.ENSP00000386380	0	0	0	0	0.043	0	0	0.583	0.583
CD8A	ICAM2	9606.ENSP00000386559	9606.ENSP00000415283	0	0	0	0	0.068	0	0	0.398	0.414
CD8A	SLC2A1	9606.ENSP00000386559	9606.ENSP00000416293	0	0	0	0	0	0	0	0.517	0.517
CD8A	PECAM1	9606.ENSP00000386559	9606.ENSP00000457421	0	0	0	0	0.133	0.064	0	0.715	0.748
CD8A	MYC	9606.ENSP00000386559	9606.ENSP00000478887	0	0	0	0	0	0	0	0.756	0.756
CD8A	FAS	9606.ENSP00000386559	9606.ENSP00000498466	0	0	0	0	0.058	0	0	0.839	0.841
CD8A	CXCR4	9606.ENSP00000386559	9606.ENSP00000386884	0	0	0	0	0.084	0	0	0.899	0.903
CD8A	ITGAX	9606.ENSP00000386559	9606.ENSP00000454623	0	0	0	0	0.136	0	0	0.932	0.938
CD8A	ITGAM	9606.ENSP00000386559	9606.ENSP00000496959	0	0	0	0	0.154	0	0	0.932	0.94
CD8A	MYD88	9606.ENSP00000386559	9606.ENSP00000498321	0	0	0	0	0.065	0	0	0.94	0.942
CD8A	TNF	9606.ENSP00000386559	9606.ENSP00000398698	0	0	0	0	0.073	0	0	0.957	0.958
CD9	TNFRSF1A	9606.ENSP00000371958	9606.ENSP00000162749	0	0	0	0	0.088	0	0	0.518	0.542
CD9	MMP2	9606.ENSP00000371958	9606.ENSP00000219070	0	0	0	0	0.092	0	0	0.379	0.412
CD9	TGFB1	9606.ENSP00000371958	9606.ENSP00000221930	0	0	0	0	0.042	0.056	0	0.48	0.488
CD9	GFAP	9606.ENSP00000371958	9606.ENSP00000253408	0	0	0	0	0.089	0	0	0.526	0.549
CD9	FLT4	9606.ENSP00000371958	9606.ENSP00000261937	0	0	0	0	0.081	0	0	0.43	0.453
CD9	IL1B	9606.ENSP00000371958	9606.ENSP00000263341	0	0	0	0	0	0	0	0.495	0.495
CD9	FGF2	9606.ENSP00000371958	9606.ENSP00000264498	0	0	0	0	0.069	0	0	0.449	0.465
CD9	STAT3	9606.ENSP00000371958	9606.ENSP00000264657	0	0	0	0	0.089	0	0	0.421	0.45
CD9	ICAM1	9606.ENSP00000371958	9606.ENSP00000264832	0	0	0	0	0.047	0	0	0.912	0.912
CD9	ITGA5	9606.ENSP00000371958	9606.ENSP00000293379	0	0	0	0	0.087	0.295	0	0.751	0.826
CD9	MMP14	9606.ENSP00000371958	9606.ENSP00000308208	0	0	0	0	0.119	0.292	0	0.32	0.539
CD9	FN1	9606.ENSP00000371958	9606.ENSP00000346839	0	0	0	0	0.092	0	0	0.695	0.711
CD9	ITGAL	9606.ENSP00000371958	9606.ENSP00000349252	0	0	0	0	0.055	0.046	0	0.53	0.54
CD9	MSN	9606.ENSP00000371958	9606.ENSP00000353408	0	0	0	0	0.073	0	0	0.427	0.447
CD9	TREM2	9606.ENSP00000371958	9606.ENSP00000362205	0	0	0	0	0.097	0	0	0.475	0.506
CD9	ENG	9606.ENSP00000371958	9606.ENSP00000362299	0	0	0	0	0.055	0	0	0.643	0.648
CD9	TLR4	9606.ENSP00000371958	9606.ENSP00000363089	0	0	0	0	0.115	0	0	0.371	0.419
CD9	ITGAX	9606.ENSP00000371958	9606.ENSP00000454623	0	0	0	0	0.086	0.046	0	0.452	0.481
CD9	MYC	9606.ENSP00000371958	9606.ENSP00000478887	0	0	0	0	0	0	0	0.506	0.506
CD9	CXCR4	9606.ENSP00000371958	9606.ENSP00000386884	0	0	0	0	0.105	0	0	0.474	0.509
CD9	ICAM2	9606.ENSP00000371958	9606.ENSP00000415283	0	0	0	0	0.083	0	0	0.508	0.529
CD9	TNF	9606.ENSP00000371958	9606.ENSP00000398698	0	0	0	0	0.098	0	0	0.512	0.541
CD9	ITGAM	9606.ENSP00000371958	9606.ENSP00000496959	0	0	0	0	0.1	0.046	0	0.575	0.603
CD9	PECAM1	9606.ENSP00000371958	9606.ENSP00000457421	0	0	0	0	0.104	0.113	0.4	0.68	0.827
CDK2	TNFRSF1A	9606.ENSP00000266970	9606.ENSP00000162749	0	0	0	0	0	0	0	0.499	0.499
CDK2	NFKBIA	9606.ENSP00000266970	9606.ENSP00000216797	0	0	0	0	0.074	0.116	0	0.445	0.506
CDK2	MMP2	9606.ENSP00000266970	9606.ENSP00000219070	0	0	0	0	0	0	0	0.479	0.479
CDK2	TGFB1	9606.ENSP00000266970	9606.ENSP00000221930	0	0	0	0	0.081	0	0	0.446	0.469
CDK2	IL1B	9606.ENSP00000266970	9606.ENSP00000263341	0	0	0	0	0	0	0	0.411	0.411
CDK2	FGF2	9606.ENSP00000266970	9606.ENSP00000264498	0	0	0	0	0	0.052	0	0.415	0.421
CDK2	STAT3	9606.ENSP00000266970	9606.ENSP00000264657	0	0	0	0	0.07	0.093	0	0.594	0.627
CDK2	FASLG	9606.ENSP00000266970	9606.ENSP00000356694	0	0	0	0	0.055	0	0	0.398	0.407
CDK2	STAT1	9606.ENSP00000266970	9606.ENSP00000354394	0	0	0	0	0.062	0.093	0	0.37	0.417
CDK2	RELA	9606.ENSP00000266970	9606.ENSP00000384273	0	0	0	0	0.087	0.092	0	0.373	0.435
CDK2	PSMB9	9606.ENSP00000266970	9606.ENSP00000363993	0	0	0	0	0.047	0	0.4	0.11	0.446
CDK2	PSMB8	9606.ENSP00000266970	9606.ENSP00000364016	0	0	0	0	0.062	0.054	0.4	0.092	0.452
CDK2	TNF	9606.ENSP00000266970	9606.ENSP00000398698	0	0	0	0	0.074	0	0	0.471	0.489
CDK2	TGFBR2	9606.ENSP00000266970	9606.ENSP00000351905	0	0	0	0	0	0.098	0	0.479	0.51
CDK2	PTGS2	9606.ENSP00000266970	9606.ENSP00000356438	0	0	0	0	0	0	0	0.598	0.598
CDK2	MYC	9606.ENSP00000266970	9606.ENSP00000478887	0	0	0	0	0.114	0.327	0.5	0.884	0.96
CDK2	CDKN1A	9606.ENSP00000266970	9606.ENSP00000384849	0	0	0	0	0.085	0.994	0.9	0.999	0.999
CDKN1A	HMOX1	9606.ENSP00000384849	9606.ENSP00000216117	0	0	0	0	0.144	0	0	0.413	0.476
CDKN1A	NFKBIA	9606.ENSP00000384849	9606.ENSP00000216797	0	0	0	0	0.168	0.049	0	0.447	0.524
CDKN1A	MMP2	9606.ENSP00000384849	9606.ENSP00000219070	0	0	0	0	0.086	0	0	0.45	0.476
CDKN1A	TGFB1	9606.ENSP00000384849	9606.ENSP00000221930	0	0	0	0	0.118	0	0	0.571	0.605
CDKN1A	LOX	9606.ENSP00000384849	9606.ENSP00000231004	0	0	0	0	0.072	0.045	0	0.561	0.576
CDKN1A	IL1B	9606.ENSP00000384849	9606.ENSP00000263341	0	0	0	0	0.152	0	0	0.475	0.536
CDKN1A	FGF2	9606.ENSP00000384849	9606.ENSP00000264498	0	0	0	0	0.042	0	0	0.446	0.446
CDKN1A	STAT3	9606.ENSP00000384849	9606.ENSP00000264657	0	0	0	0	0.125	0.828	0.5	0.815	0.984
CDKN1A	ICAM1	9606.ENSP00000384849	9606.ENSP00000264832	0	0	0	0	0.152	0	0	0.348	0.423
CDKN1A	ITGA5	9606.ENSP00000384849	9606.ENSP00000293379	0	0	0	0	0.103	0	0	0.478	0.511
CDKN1A	MMP14	9606.ENSP00000384849	9606.ENSP00000308208	0	0	0	0	0.095	0	0	0.501	0.529
CDKN1A	NOS2	9606.ENSP00000384849	9606.ENSP00000327251	0	0	0	0	0	0.125	0.4	0.195	0.54
CDKN1A	FN1	9606.ENSP00000384849	9606.ENSP00000346839	0	0	0	0	0.067	0	0	0.447	0.462
CDKN1A	TGFBR2	9606.ENSP00000384849	9606.ENSP00000351905	0	0	0	0	0.067	0.047	0	0.447	0.465
CDKN1A	STAT1	9606.ENSP00000384849	9606.ENSP00000354394	0	0	0	0	0.105	0	0.4	0.599	0.765
CDKN1A	PTGS2	9606.ENSP00000384849	9606.ENSP00000356438	0	0	0	0	0.105	0	0	0.655	0.678
CDKN1A	FASLG	9606.ENSP00000384849	9606.ENSP00000356694	0	0	0	0	0	0	0	0.453	0.453
CDKN1A	PSMB9	9606.ENSP00000384849	9606.ENSP00000363993	0	0	0	0	0.091	0	0.4	0.157	0.5
CDKN1A	PSMB8	9606.ENSP00000384849	9606.ENSP00000364016	0	0	0	0	0.097	0	0.4	0.439	0.669
CDKN1A	NFE2L2	9606.ENSP00000384849	9606.ENSP00000380252	0	0	0	0	0.103	0.295	0.4	0.419	0.75
CDKN1A	RELA	9606.ENSP00000384849	9606.ENSP00000384273	0	0	0	0	0.142	0.512	0	0.439	0.745
CDKN1A	FAS	9606.ENSP00000384849	9606.ENSP00000498466	0	0	0	0	0.139	0	0	0.432	0.49
CDKN1A	TNF	9606.ENSP00000384849	9606.ENSP00000398698	0	0	0	0	0.124	0	0	0.527	0.567
CDKN1A	MYC	9606.ENSP00000384849	9606.ENSP00000478887	0	0	0	0	0.105	0.32	0.5	0.945	0.981
CP	HMOX1	9606.ENSP00000264613	9606.ENSP00000216117	0	0	0	0	0	0.063	0.9	0.434	0.942
CP	LOX	9606.ENSP00000264613	9606.ENSP00000231004	0	0	0	0	0.065	0.046	0	0.62	0.632
CP	IL1B	9606.ENSP00000264613	9606.ENSP00000263341	0	0	0	0	0	0	0	0.418	0.418
CRH	TLR2	9606.ENSP00000276571	9606.ENSP00000260010	0	0	0	0	0	0	0	0.471	0.471
CRH	IL1B	9606.ENSP00000276571	9606.ENSP00000263341	0	0	0	0	0	0	0	0.738	0.738
CRH	STAT3	9606.ENSP00000276571	9606.ENSP00000264657	0	0	0	0	0	0	0	0.531	0.531
CRH	TLR4	9606.ENSP00000276571	9606.ENSP00000363089	0	0	0	0	0	0	0	0.417	0.417
CRH	FN1	9606.ENSP00000276571	9606.ENSP00000346839	0	0	0	0	0	0	0	0.423	0.423
CRH	TNF	9606.ENSP00000276571	9606.ENSP00000398698	0	0	0	0	0	0	0	0.558	0.558
CRH	TH	9606.ENSP00000276571	9606.ENSP00000370571	0	0	0	0	0.046	0	0	0.644	0.646
CSF1	TNFRSF1A	9606.ENSP00000327513	9606.ENSP00000162749	0	0	0.247	0	0.068	0	0	0.431	0.565
CSF1	NFKBIA	9606.ENSP00000327513	9606.ENSP00000216797	0	0	0	0	0.113	0	0	0.48	0.519
CSF1	MMP2	9606.ENSP00000327513	9606.ENSP00000219070	0	0	0	0	0.087	0	0	0.42	0.448
CSF1	TGFB1	9606.ENSP00000327513	9606.ENSP00000221930	0	0	0	0	0.139	0	0	0.75	0.776
CSF1	HGF	9606.ENSP00000327513	9606.ENSP00000222390	0	0	0	0	0.061	0	0	0.494	0.504
CSF1	SPI1	9606.ENSP00000327513	9606.ENSP00000227163	0	0	0	0	0.056	0	0	0.708	0.712
CSF1	GFAP	9606.ENSP00000327513	9606.ENSP00000253408	0	0	0	0	0.079	0	0	0.409	0.433
CSF1	TLR2	9606.ENSP00000327513	9606.ENSP00000260010	0	0	0	0	0.088	0	0	0.584	0.605
CSF1	FLT4	9606.ENSP00000327513	9606.ENSP00000261937	0	0	0	0	0.068	0.093	0.65	0.311	0.769
CSF1	IL1B	9606.ENSP00000327513	9606.ENSP00000263341	0	0	0	0	0.12	0	0	0.793	0.81
CSF1	FGF2	9606.ENSP00000327513	9606.ENSP00000264498	0	0	0	0	0.06	0	0	0.57	0.578
CSF1	STAT3	9606.ENSP00000327513	9606.ENSP00000264657	0	0	0	0	0.075	0	0.5	0.607	0.802
CSF1	ICAM1	9606.ENSP00000327513	9606.ENSP00000264832	0	0	0	0	0.389	0	0.4	0.571	0.829
CSF1	IRF8	9606.ENSP00000327513	9606.ENSP00000268638	0	0	0	0	0.074	0	0	0.54	0.556
CSF1	CSF1R	9606.ENSP00000327513	9606.ENSP00000286301	0	0	0	0	0.106	0.986	0.9	0.999	0.999
CSF1	CXCL16	9606.ENSP00000327513	9606.ENSP00000293778	0	0	0	0	0.049	0	0	0.411	0.415
CSF1	CXCL10	9606.ENSP00000327513	9606.ENSP00000305651	0	0	0	0	0.11	0	0	0.706	0.728
CSF1	CXCL11	9606.ENSP00000327513	9606.ENSP00000306884	0	0	0	0	0.088	0	0	0.482	0.508
CSF1	NOS2	9606.ENSP00000327513	9606.ENSP00000327251	0	0	0	0	0	0	0	0.459	0.459
CSF1	MMP12	9606.ENSP00000327513	9606.ENSP00000458585	0	0	0	0	0.069	0	0	0.382	0.401
CSF1	RELA	9606.ENSP00000327513	9606.ENSP00000384273	0	0	0	0	0.11	0	0	0.357	0.403
CSF1	FASLG	9606.ENSP00000327513	9606.ENSP00000356694	0	0	0	0	0.044	0	0	0.445	0.446
CSF1	IL4R	9606.ENSP00000327513	9606.ENSP00000379111	0	0	0	0	0.11	0	0	0.447	0.487
CSF1	PECAM1	9606.ENSP00000327513	9606.ENSP00000457421	0	0	0	0	0.042	0	0	0.487	0.488
CSF1	PTGS2	9606.ENSP00000327513	9606.ENSP00000356438	0	0	0	0	0.083	0	0	0.479	0.502
CSF1	TMEM119	9606.ENSP00000327513	9606.ENSP00000376553	0	0	0	0	0.042	0	0	0.505	0.506
CSF1	MYC	9606.ENSP00000327513	9606.ENSP00000478887	0	0	0	0	0.06	0.129	0	0.448	0.508
CSF1	ITGAL	9606.ENSP00000327513	9606.ENSP00000349252	0	0	0	0	0.086	0	0	0.497	0.521
CSF1	CYBB	9606.ENSP00000327513	9606.ENSP00000367851	0	0	0	0	0.086	0	0	0.508	0.531
CSF1	FN1	9606.ENSP00000327513	9606.ENSP00000346839	0	0	0	0	0.085	0	0	0.512	0.534
CSF1	IL6R	9606.ENSP00000327513	9606.ENSP00000357470	0	0	0	0	0.068	0	0	0.559	0.571
CSF1	MYD88	9606.ENSP00000327513	9606.ENSP00000498321	0	0	0	0	0.101	0	0	0.542	0.571
CSF1	CSF2RB	9606.ENSP00000327513	9606.ENSP00000384053	0	0	0	0	0.108	0	0	0.562	0.593
CSF1	TREM2	9606.ENSP00000327513	9606.ENSP00000362205	0	0	0	0	0.056	0	0	0.596	0.602
CSF1	TNFRSF1B	9606.ENSP00000327513	9606.ENSP00000365435	0	0	0	0	0.106	0	0	0.611	0.637
CSF1	CX3CR1	9606.ENSP00000327513	9606.ENSP00000351059	0	0	0	0	0	0	0	0.638	0.638
CSF1	TLR4	9606.ENSP00000327513	9606.ENSP00000363089	0	0	0	0	0.103	0	0	0.649	0.672
CSF1	ITGAX	9606.ENSP00000327513	9606.ENSP00000454623	0	0	0	0	0.129	0	0	0.663	0.695
CSF1	CXCR4	9606.ENSP00000327513	9606.ENSP00000386884	0	0	0	0	0.098	0	0	0.751	0.766
CSF1	ITGAM	9606.ENSP00000327513	9606.ENSP00000496959	0	0	0	0	0.094	0	0	0.768	0.781
CSF1	STAT1	9606.ENSP00000327513	9606.ENSP00000354394	0	0	0	0	0.083	0	0.5	0.582	0.791
CSF1	TNF	9606.ENSP00000327513	9606.ENSP00000398698	0	0	0	0	0.126	0	0	0.781	0.801
CSF1	IL1R1	9606.ENSP00000327513	9606.ENSP00000386380	0	0	0	0	0.084	0	0.4	0.678	0.807
CSF1R	TGFB1	9606.ENSP00000286301	9606.ENSP00000221930	0	0	0	0	0.124	0.063	0	0.511	0.564
CSF1R	HGF	9606.ENSP00000286301	9606.ENSP00000222390	0	0	0	0	0.084	0	0.65	0.352	0.774
CSF1R	SPI1	9606.ENSP00000286301	9606.ENSP00000227163	0	0	0	0	0.509	0	0.9	0.858	0.992
CSF1R	IL10RA	9606.ENSP00000286301	9606.ENSP00000227752	0	0	0	0	0.413	0	0	0.533	0.714
CSF1R	GFAP	9606.ENSP00000286301	9606.ENSP00000253408	0	0	0	0	0.055	0.046	0	0.429	0.44
CSF1R	TLR2	9606.ENSP00000286301	9606.ENSP00000260010	0	0	0	0	0.344	0.064	0	0.648	0.765
CSF1R	PLCB2	9606.ENSP00000286301	9606.ENSP00000260402	0	0	0	0	0.262	0	0.65	0.092	0.745
CSF1R	IL1B	9606.ENSP00000286301	9606.ENSP00000263341	0	0	0	0	0.178	0	0	0.624	0.678
CSF1R	FGF2	9606.ENSP00000286301	9606.ENSP00000264498	0	0	0	0	0	0.168	0.65	0.434	0.821
CSF1R	STAT3	9606.ENSP00000286301	9606.ENSP00000264657	0	0	0	0	0.071	0.095	0.5	0.57	0.795
CSF1R	ICAM1	9606.ENSP00000286301	9606.ENSP00000264832	0	0	0	0	0.122	0	0	0.603	0.636
CSF1R	IRF8	9606.ENSP00000286301	9606.ENSP00000268638	0	0	0	0	0.298	0.045	0	0.621	0.723
CSF1R	TNFRSF1B	9606.ENSP00000286301	9606.ENSP00000365435	0	0	0	0	0.199	0	0	0.29	0.407
CSF1R	FN1	9606.ENSP00000286301	9606.ENSP00000346839	0	0	0	0	0.044	0	0	0.423	0.425
CSF1R	NLRP3	9606.ENSP00000286301	9606.ENSP00000337383	0	0	0	0	0.248	0.064	0	0.258	0.432
CSF1R	TSPO	9606.ENSP00000286301	9606.ENSP00000379563	0	0	0	0	0.072	0	0	0.42	0.438
CSF1R	NOS2	9606.ENSP00000286301	9606.ENSP00000327251	0	0	0	0	0.064	0.115	0	0.38	0.442
CSF1R	MYD88	9606.ENSP00000286301	9606.ENSP00000498321	0	0	0	0	0.129	0	0	0.399	0.454
CSF1R	PTGS2	9606.ENSP00000286301	9606.ENSP00000356438	0	0	0	0	0.114	0	0	0.412	0.457
CSF1R	ITGAL	9606.ENSP00000286301	9606.ENSP00000349252	0	0	0	0	0.235	0	0	0.321	0.459
CSF1R	ENG	9606.ENSP00000286301	9606.ENSP00000362299	0	0	0	0	0.164	0	0	0.418	0.492
CSF1R	MYC	9606.ENSP00000286301	9606.ENSP00000478887	0	0	0	0	0.083	0	0	0.474	0.497
CSF1R	MARCO	9606.ENSP00000286301	9606.ENSP00000318916	0	0	0	0	0.322	0	0	0.299	0.505
CSF1R	CXCL10	9606.ENSP00000286301	9606.ENSP00000305651	0	0	0	0	0.107	0	0	0.476	0.512
CSF1R	IL1R1	9606.ENSP00000286301	9606.ENSP00000386380	0	0	0	0	0.09	0	0	0.523	0.547
CSF1R	FASLG	9606.ENSP00000286301	9606.ENSP00000356694	0	0	0	0	0.085	0	0	0.544	0.565
CSF1R	IL6R	9606.ENSP00000286301	9606.ENSP00000357470	0	0	0	0	0.113	0	0	0.545	0.58
CSF1R	STAB1	9606.ENSP00000286301	9606.ENSP00000312946	0	0	0	0	0.427	0	0	0.322	0.595
CSF1R	CXCR4	9606.ENSP00000286301	9606.ENSP00000386884	0	0	0	0	0.118	0	0	0.571	0.606
CSF1R	IL4R	9606.ENSP00000286301	9606.ENSP00000379111	0	0	0	0	0.113	0.074	0	0.608	0.65
CSF1R	CSF2RB	9606.ENSP00000286301	9606.ENSP00000384053	0	0	0	0	0.182	0.091	0	0.58	0.66
CSF1R	TNF	9606.ENSP00000286301	9606.ENSP00000398698	0	0	0	0	0.158	0	0	0.63	0.675
CSF1R	TGFBR2	9606.ENSP00000286301	9606.ENSP00000351905	0	0	0.23	0	0.147	0.074	0	0.541	0.683
CSF1R	PECAM1	9606.ENSP00000286301	9606.ENSP00000457421	0	0	0	0	0.421	0.045	0	0.542	0.725
CSF1R	TMEM119	9606.ENSP00000286301	9606.ENSP00000376553	0	0	0	0	0.072	0	0	0.735	0.744
CSF1R	STAT1	9606.ENSP00000286301	9606.ENSP00000354394	0	0	0	0	0.121	0.079	0.5	0.446	0.745
CSF1R	CYBB	9606.ENSP00000286301	9606.ENSP00000367851	0	0	0	0	0.502	0	0	0.58	0.782
CSF1R	TLR4	9606.ENSP00000286301	9606.ENSP00000363089	0	0	0	0	0.296	0.064	0	0.72	0.8
CSF1R	CX3CR1	9606.ENSP00000286301	9606.ENSP00000351059	0	0	0	0	0.305	0	0	0.774	0.836
CSF1R	ITGAX	9606.ENSP00000286301	9606.ENSP00000454623	0	0	0	0	0.267	0	0	0.798	0.846
CSF1R	TREM2	9606.ENSP00000286301	9606.ENSP00000362205	0	0	0	0	0.296	0	0	0.805	0.857
CSF1R	ITGAM	9606.ENSP00000286301	9606.ENSP00000496959	0	0	0	0	0.345	0	0	0.802	0.865
CSF2RB	SPI1	9606.ENSP00000384053	9606.ENSP00000227163	0	0	0	0	0.496	0	0	0.326	0.646
CSF2RB	IL10RA	9606.ENSP00000384053	9606.ENSP00000227752	0	0	0.246	0	0.347	0	0	0.472	0.717
CSF2RB	IL1B	9606.ENSP00000384053	9606.ENSP00000263341	0	0	0	0	0.186	0	0	0.293	0.4
CSF2RB	STAT3	9606.ENSP00000384053	9606.ENSP00000264657	0	0	0	0	0.081	0.292	0	0.497	0.644
CSF2RB	IRF8	9606.ENSP00000384053	9606.ENSP00000268638	0	0	0	0	0.27	0	0	0.295	0.463
CSF2RB	STAT1	9606.ENSP00000384053	9606.ENSP00000354394	0	0	0	0	0.1	0	0	0.473	0.505
CSF2RB	IL6R	9606.ENSP00000384053	9606.ENSP00000357470	0	0	0	0	0.166	0	0	0.552	0.61
CSF2RB	CYBB	9606.ENSP00000384053	9606.ENSP00000367851	0	0	0	0	0.348	0	0	0.135	0.412
CSF2RB	ITGAX	9606.ENSP00000384053	9606.ENSP00000454623	0	0	0	0	0.227	0	0	0.308	0.442
CSF2RB	MYD88	9606.ENSP00000384053	9606.ENSP00000498321	0	0	0	0	0.141	0	0	0.403	0.465
CSF2RB	ITGAM	9606.ENSP00000384053	9606.ENSP00000496959	0	0	0	0	0.301	0	0	0.608	0.714
CX3CR1	TGFB1	9606.ENSP00000351059	9606.ENSP00000221930	0	0	0	0	0	0.069	0	0.476	0.491
CX3CR1	SPI1	9606.ENSP00000351059	9606.ENSP00000227163	0	0	0	0	0.223	0	0	0.507	0.6
CX3CR1	IL10RA	9606.ENSP00000351059	9606.ENSP00000227752	0	0	0	0	0.17	0	0	0.398	0.479
CX3CR1	GFAP	9606.ENSP00000351059	9606.ENSP00000253408	0	0	0	0	0.044	0	0	0.607	0.608
CX3CR1	TLR2	9606.ENSP00000351059	9606.ENSP00000260010	0	0	0	0	0.114	0	0	0.72	0.741
CX3CR1	IL1B	9606.ENSP00000351059	9606.ENSP00000263341	0	0	0	0	0.08	0	0	0.726	0.737
CX3CR1	STAT3	9606.ENSP00000351059	9606.ENSP00000264657	0	0	0	0	0	0	0	0.435	0.435
CX3CR1	ICAM1	9606.ENSP00000351059	9606.ENSP00000264832	0	0	0	0	0.058	0	0	0.704	0.709
CX3CR1	IRF8	9606.ENSP00000351059	9606.ENSP00000268638	0	0	0	0	0.122	0	0	0.543	0.581
CX3CR1	CXCL16	9606.ENSP00000351059	9606.ENSP00000293778	0	0	0	0	0	0	0.65	0.926	0.972
CX3CR1	CXCL10	9606.ENSP00000351059	9606.ENSP00000305651	0	0	0	0	0.049	0	0.65	0.871	0.953
CX3CR1	CXCL11	9606.ENSP00000351059	9606.ENSP00000306884	0	0	0	0	0.045	0	0.65	0.655	0.874
CX3CR1	STAB1	9606.ENSP00000351059	9606.ENSP00000312946	0	0	0	0	0.086	0	0	0.55	0.571
CX3CR1	ITGAL	9606.ENSP00000351059	9606.ENSP00000349252	0	0	0	0	0.181	0	0	0.471	0.548
CX3CR1	STAT1	9606.ENSP00000351059	9606.ENSP00000354394	0	0	0	0	0.047	0	0	0.399	0.402
CX3CR1	TSPO	9606.ENSP00000351059	9606.ENSP00000379563	0	0	0	0	0.043	0	0	0.41	0.411
CX3CR1	IL1R1	9606.ENSP00000351059	9606.ENSP00000386380	0	0	0	0	0.052	0	0	0.436	0.442
CX3CR1	FASLG	9606.ENSP00000351059	9606.ENSP00000356694	0	0	0	0	0.189	0	0	0.38	0.476
CX3CR1	MYD88	9606.ENSP00000351059	9606.ENSP00000498321	0	0	0	0	0.056	0	0	0.474	0.482
CX3CR1	CYBB	9606.ENSP00000351059	9606.ENSP00000367851	0	0	0	0	0.233	0	0	0.374	0.499
CX3CR1	ICAM2	9606.ENSP00000351059	9606.ENSP00000415283	0	0	0	0	0.063	0	0	0.524	0.534
CX3CR1	PECAM1	9606.ENSP00000351059	9606.ENSP00000457421	0	0	0	0	0.086	0.091	0	0.487	0.537
CX3CR1	P2RX4	9606.ENSP00000351059	9606.ENSP00000353032	0	0	0	0	0	0	0	0.603	0.603
CX3CR1	TLR4	9606.ENSP00000351059	9606.ENSP00000363089	0	0	0	0	0.176	0	0	0.619	0.672
CX3CR1	TNF	9606.ENSP00000351059	9606.ENSP00000398698	0	0	0	0	0.043	0	0	0.696	0.696
CX3CR1	ITGAX	9606.ENSP00000351059	9606.ENSP00000454623	0	0	0	0	0.085	0	0	0.72	0.732
CX3CR1	TREM2	9606.ENSP00000351059	9606.ENSP00000362205	0	0	0	0	0.136	0	0	0.742	0.767
CX3CR1	CXCR4	9606.ENSP00000351059	9606.ENSP00000386884	0	0	0	0.831	0.099	0	0.5	0.572	0.79
CX3CR1	TMEM119	9606.ENSP00000351059	9606.ENSP00000376553	0	0	0	0	0.087	0	0	0.779	0.79
CX3CR1	ITGAM	9606.ENSP00000351059	9606.ENSP00000496959	0	0	0	0	0.214	0	0	0.789	0.827
CXCL10	TNFRSF1A	9606.ENSP00000305651	9606.ENSP00000162749	0	0	0	0	0.042	0	0	0.54	0.54
CXCL10	HMOX1	9606.ENSP00000305651	9606.ENSP00000216117	0	0	0	0	0.062	0	0	0.416	0.429
CXCL10	NFKBIA	9606.ENSP00000305651	9606.ENSP00000216797	0	0	0	0	0.145	0	0	0.722	0.752
CXCL10	MMP2	9606.ENSP00000305651	9606.ENSP00000219070	0	0	0	0	0	0	0	0.446	0.446
CXCL10	TGFB1	9606.ENSP00000305651	9606.ENSP00000221930	0	0	0	0	0	0	0	0.62	0.62
CXCL10	HGF	9606.ENSP00000305651	9606.ENSP00000222390	0	0	0	0	0.063	0	0	0.525	0.535
CXCL10	IL10RA	9606.ENSP00000305651	9606.ENSP00000227752	0	0	0	0	0.17	0	0	0.413	0.492
CXCL10	GFAP	9606.ENSP00000305651	9606.ENSP00000253408	0	0	0	0	0.067	0	0	0.454	0.469
CXCL10	TLR2	9606.ENSP00000305651	9606.ENSP00000260010	0	0	0	0	0.168	0	0	0.887	0.902
CXCL10	IL1B	9606.ENSP00000305651	9606.ENSP00000263341	0	0	0	0	0.229	0	0.4	0.925	0.962
CXCL10	FGF2	9606.ENSP00000305651	9606.ENSP00000264498	0	0	0	0	0.055	0	0	0.621	0.626
CXCL10	STAT3	9606.ENSP00000305651	9606.ENSP00000264657	0	0	0	0	0.098	0	0.5	0.634	0.82
CXCL10	ICAM1	9606.ENSP00000305651	9606.ENSP00000264832	0	0	0	0	0.257	0	0	0.817	0.858
CXCL10	IRF8	9606.ENSP00000305651	9606.ENSP00000268638	0	0	0	0	0.174	0	0	0.658	0.705
CXCL10	CXCL16	9606.ENSP00000305651	9606.ENSP00000293778	0	0	0	0	0.142	0	0.5	0.79	0.902
CXCL10	ITGAL	9606.ENSP00000305651	9606.ENSP00000349252	0	0	0	0	0.111	0	0	0.367	0.413
CXCL10	MYC	9606.ENSP00000305651	9606.ENSP00000478887	0	0	0	0	0.11	0	0	0.391	0.435
CXCL10	TREM2	9606.ENSP00000305651	9606.ENSP00000362205	0	0	0	0	0.104	0	0	0.397	0.436
CXCL10	CYBB	9606.ENSP00000305651	9606.ENSP00000367851	0	0	0	0	0.145	0	0	0.37	0.438
CXCL10	IL4R	9606.ENSP00000305651	9606.ENSP00000379111	0	0	0	0	0.081	0	0	0.419	0.443
CXCL10	FAS	9606.ENSP00000305651	9606.ENSP00000498466	0	0	0	0	0.144	0	0	0.382	0.448
CXCL10	PSMB8	9606.ENSP00000305651	9606.ENSP00000364016	0	0	0	0	0.216	0	0	0.35	0.468
CXCL10	MMP12	9606.ENSP00000305651	9606.ENSP00000458585	0	0	0	0	0.121	0	0	0.447	0.493
CXCL10	IL6R	9606.ENSP00000305651	9606.ENSP00000357470	0	0	0	0	0.073	0	0	0.48	0.497
CXCL10	PECAM1	9606.ENSP00000305651	9606.ENSP00000457421	0	0	0	0	0.078	0	0	0.481	0.501
CXCL10	NOS2	9606.ENSP00000305651	9606.ENSP00000327251	0	0	0	0	0.049	0	0	0.516	0.52
CXCL10	IL15RA	9606.ENSP00000305651	9606.ENSP00000380421	0	0	0	0	0.246	0	0	0.396	0.525
CXCL10	PSMB9	9606.ENSP00000305651	9606.ENSP00000363993	0	0	0	0	0.276	0	0	0.379	0.531
CXCL10	NLRP3	9606.ENSP00000305651	9606.ENSP00000337383	0	0	0	0	0.074	0	0	0.54	0.555
CXCL10	PTGS2	9606.ENSP00000305651	9606.ENSP00000356438	0	0	0	0	0.103	0	0	0.577	0.605
CXCL10	IL1R1	9606.ENSP00000305651	9606.ENSP00000386380	0	0	0	0	0.067	0	0	0.6	0.61
CXCL10	FASLG	9606.ENSP00000305651	9606.ENSP00000356694	0	0	0	0	0.148	0	0	0.574	0.621
CXCL10	ITGAX	9606.ENSP00000305651	9606.ENSP00000454623	0	0	0	0	0.096	0	0	0.624	0.645
CXCL10	RELA	9606.ENSP00000305651	9606.ENSP00000384273	0	0	0	0	0.083	0	0	0.65	0.666
CXCL10	TNFRSF1B	9606.ENSP00000305651	9606.ENSP00000365435	0	0	0	0	0.104	0	0	0.657	0.679
CXCL10	FN1	9606.ENSP00000305651	9606.ENSP00000346839	0	0	0	0	0.043	0	0	0.686	0.686
CXCL10	ITGAM	9606.ENSP00000305651	9606.ENSP00000496959	0	0	0	0	0.119	0	0	0.754	0.774
CXCL10	MYD88	9606.ENSP00000305651	9606.ENSP00000498321	0	0	0	0	0.127	0	0	0.775	0.795
CXCL10	STAT1	9606.ENSP00000305651	9606.ENSP00000354394	0	0	0	0	0.557	0	0	0.89	0.949
CXCL10	TNF	9606.ENSP00000305651	9606.ENSP00000398698	0	0	0	0	0.265	0	0.4	0.93	0.966
CXCL10	TLR4	9606.ENSP00000305651	9606.ENSP00000363089	0	0	0	0	0.081	0	0	0.968	0.969
CXCL10	CXCR4	9606.ENSP00000305651	9606.ENSP00000386884	0	0	0	0	0.053	0	0.65	0.992	0.997
CXCL10	CXCL11	9606.ENSP00000305651	9606.ENSP00000306884	0	0	0	0.811	0.824	0.994	0.9	0.467	0.999
CXCL11	TGFB1	9606.ENSP00000306884	9606.ENSP00000221930	0	0	0	0	0	0	0	0.947	0.947
CXCL11	HGF	9606.ENSP00000306884	9606.ENSP00000222390	0	0	0	0	0	0	0	0.576	0.576
CXCL11	TLR2	9606.ENSP00000306884	9606.ENSP00000260010	0	0	0	0	0.14	0	0	0.434	0.492
CXCL11	IL1B	9606.ENSP00000306884	9606.ENSP00000263341	0	0	0	0	0.141	0	0	0.671	0.705
CXCL11	FGF2	9606.ENSP00000306884	9606.ENSP00000264498	0	0	0	0	0.074	0	0	0.397	0.418
CXCL11	STAT3	9606.ENSP00000306884	9606.ENSP00000264657	0	0	0	0	0.101	0	0	0.447	0.482
CXCL11	ICAM1	9606.ENSP00000306884	9606.ENSP00000264832	0	0	0	0	0.168	0	0	0.541	0.602
CXCL11	CXCL16	9606.ENSP00000306884	9606.ENSP00000293778	0	0	0	0	0.109	0	0.5	0.653	0.832
CXCL11	PECAM1	9606.ENSP00000306884	9606.ENSP00000457421	0	0	0	0	0.116	0	0	0.356	0.407
CXCL11	PTGS2	9606.ENSP00000306884	9606.ENSP00000356438	0	0	0	0	0.104	0	0	0.369	0.411
CXCL11	FASLG	9606.ENSP00000306884	9606.ENSP00000356694	0	0	0	0	0.107	0	0	0.374	0.417
CXCL11	MMP12	9606.ENSP00000306884	9606.ENSP00000458585	0	0	0	0	0.157	0	0	0.349	0.427
CXCL11	PSMB9	9606.ENSP00000306884	9606.ENSP00000363993	0	0	0	0	0.261	0	0	0.266	0.434
CXCL11	ITGAX	9606.ENSP00000306884	9606.ENSP00000454623	0	0	0	0	0.094	0	0	0.401	0.434
CXCL11	MYD88	9606.ENSP00000306884	9606.ENSP00000498321	0	0	0	0	0.117	0	0	0.391	0.439
CXCL11	ITGAM	9606.ENSP00000306884	9606.ENSP00000496959	0	0	0	0	0.118	0	0	0.434	0.479
CXCL11	IL15RA	9606.ENSP00000306884	9606.ENSP00000380421	0	0	0	0	0.251	0	0	0.351	0.493
CXCL11	TLR4	9606.ENSP00000306884	9606.ENSP00000363089	0	0	0	0	0.106	0	0	0.471	0.507
CXCL11	FN1	9606.ENSP00000306884	9606.ENSP00000346839	0	0	0	0	0.042	0	0	0.604	0.604
CXCL11	TGFBR2	9606.ENSP00000306884	9606.ENSP00000351905	0	0	0	0	0	0	0	0.698	0.698
CXCL11	TNF	9606.ENSP00000306884	9606.ENSP00000398698	0	0	0	0	0.143	0	0	0.67	0.705
CXCL11	STAT1	9606.ENSP00000306884	9606.ENSP00000354394	0	0	0	0	0.418	0	0	0.597	0.755
CXCL11	CXCR4	9606.ENSP00000306884	9606.ENSP00000386884	0	0	0	0	0.094	0	0.65	0.983	0.994
CXCL16	TGFB1	9606.ENSP00000293778	9606.ENSP00000221930	0	0	0	0	0.042	0	0	0.43	0.43
CXCL16	TLR2	9606.ENSP00000293778	9606.ENSP00000260010	0	0	0	0	0.175	0	0	0.527	0.593
CXCL16	IL1B	9606.ENSP00000293778	9606.ENSP00000263341	0	0	0	0	0.128	0	0	0.58	0.618
CXCL16	STAT3	9606.ENSP00000293778	9606.ENSP00000264657	0	0	0	0	0.096	0	0	0.392	0.427
CXCL16	ICAM1	9606.ENSP00000293778	9606.ENSP00000264832	0	0	0	0	0.252	0	0	0.475	0.59
CXCL16	IRF8	9606.ENSP00000293778	9606.ENSP00000268638	0	0	0	0	0.074	0	0	0.509	0.525
CXCL16	TLR4	9606.ENSP00000293778	9606.ENSP00000363089	0	0	0	0	0.097	0	0	0.426	0.46
CXCL16	ITGAM	9606.ENSP00000293778	9606.ENSP00000496959	0	0	0	0	0.109	0	0	0.419	0.46
CXCL16	PECAM1	9606.ENSP00000293778	9606.ENSP00000457421	0	0	0	0	0.084	0	0	0.53	0.551
CXCL16	ITGAX	9606.ENSP00000293778	9606.ENSP00000454623	0	0	0	0	0.147	0	0	0.537	0.588
CXCL16	TNF	9606.ENSP00000293778	9606.ENSP00000398698	0	0	0	0	0.123	0	0	0.584	0.62
CXCL16	CXCR4	9606.ENSP00000293778	9606.ENSP00000386884	0	0	0	0	0.063	0	0.65	0.812	0.933
CXCR4	TNFRSF1A	9606.ENSP00000386884	9606.ENSP00000162749	0	0	0	0	0.104	0	0	0.399	0.438
CXCR4	NFKBIA	9606.ENSP00000386884	9606.ENSP00000216797	0	0	0	0	0.137	0.045	0	0.419	0.479
CXCR4	MMP2	9606.ENSP00000386884	9606.ENSP00000219070	0	0	0	0	0.048	0	0	0.608	0.61
CXCR4	TGFB1	9606.ENSP00000386884	9606.ENSP00000221930	0	0	0	0	0.118	0.069	0	0.769	0.794
CXCR4	HGF	9606.ENSP00000386884	9606.ENSP00000222390	0	0	0	0	0	0.052	0	0.81	0.812
CXCR4	SPI1	9606.ENSP00000386884	9606.ENSP00000227163	0	0	0	0	0.122	0	0	0.356	0.411
CXCR4	IL10RA	9606.ENSP00000386884	9606.ENSP00000227752	0	0	0	0	0.219	0	0	0.334	0.458
CXCR4	LOX	9606.ENSP00000386884	9606.ENSP00000231004	0	0	0	0	0	0.049	0	0.475	0.479
CXCR4	GFAP	9606.ENSP00000386884	9606.ENSP00000253408	0	0	0	0	0	0	0	0.506	0.506
CXCR4	TLR2	9606.ENSP00000386884	9606.ENSP00000260010	0	0	0	0	0.151	0.541	0	0.75	0.894
CXCR4	FLT4	9606.ENSP00000386884	9606.ENSP00000261937	0	0	0	0	0	0	0	0.438	0.438
CXCR4	IL1B	9606.ENSP00000386884	9606.ENSP00000263341	0	0	0	0	0.128	0	0	0.821	0.838
CXCR4	FGF2	9606.ENSP00000386884	9606.ENSP00000264498	0	0	0	0	0	0	0	0.795	0.795
CXCR4	STAT3	9606.ENSP00000386884	9606.ENSP00000264657	0	0	0	0	0.069	0	0	0.768	0.775
CXCR4	ICAM1	9606.ENSP00000386884	9606.ENSP00000264832	0	0	0	0	0.115	0	0	0.823	0.837
CXCR4	IRF8	9606.ENSP00000386884	9606.ENSP00000268638	0	0	0	0	0.172	0	0	0.383	0.467
CXCR4	ITGA5	9606.ENSP00000386884	9606.ENSP00000293379	0	0	0	0	0.093	0	0	0.573	0.596
CXCR4	MMP14	9606.ENSP00000386884	9606.ENSP00000308208	0	0	0	0	0.087	0	0	0.445	0.471
CXCR4	FN1	9606.ENSP00000386884	9606.ENSP00000346839	0	0	0	0	0	0	0	0.857	0.857
CXCR4	ITGAL	9606.ENSP00000386884	9606.ENSP00000349252	0	0	0	0	0.147	0	0	0.788	0.811
CXCR4	TGFBR2	9606.ENSP00000386884	9606.ENSP00000351905	0	0	0	0	0.132	0	0	0.399	0.456
CXCR4	STAT1	9606.ENSP00000386884	9606.ENSP00000354394	0	0	0	0	0.088	0	0	0.487	0.513
CXCR4	PTGS2	9606.ENSP00000386884	9606.ENSP00000356438	0	0	0	0	0.119	0	0	0.537	0.575
CXCR4	FASLG	9606.ENSP00000386884	9606.ENSP00000356694	0	0	0	0	0.042	0	0	0.476	0.477
CXCR4	IL6R	9606.ENSP00000386884	9606.ENSP00000357470	0	0	0	0	0.101	0	0	0.677	0.697
CXCR4	ENG	9606.ENSP00000386884	9606.ENSP00000362299	0	0	0	0	0	0	0	0.609	0.609
CXCR4	TLR4	9606.ENSP00000386884	9606.ENSP00000363089	0	0	0	0	0.128	0	0	0.807	0.824
CXCR4	TNFRSF1B	9606.ENSP00000386884	9606.ENSP00000365435	0	0	0	0	0.133	0	0	0.559	0.601
CXCR4	CYBB	9606.ENSP00000386884	9606.ENSP00000367851	0	0	0	0	0.193	0	0	0.513	0.59
CXCR4	IL15RA	9606.ENSP00000386884	9606.ENSP00000380421	0	0	0	0	0.042	0	0	0.438	0.438
CXCR4	RELA	9606.ENSP00000386884	9606.ENSP00000384273	0	0	0	0	0.097	0.297	0	0.398	0.585
CXCR4	IL1R1	9606.ENSP00000386884	9606.ENSP00000386380	0	0	0	0	0.086	0	0	0.392	0.421
CXCR4	ICAM2	9606.ENSP00000386884	9606.ENSP00000415283	0	0	0	0	0.147	0	0	0.357	0.428
CXCR4	FAS	9606.ENSP00000386884	9606.ENSP00000498466	0	0	0	0	0.102	0	0	0.479	0.512
CXCR4	MYC	9606.ENSP00000386884	9606.ENSP00000478887	0	0	0	0	0.067	0	0	0.583	0.594
CXCR4	ITGAX	9606.ENSP00000386884	9606.ENSP00000454623	0	0	0	0	0.133	0	0	0.58	0.621
CXCR4	MYD88	9606.ENSP00000386884	9606.ENSP00000498321	0	0	0	0	0.094	0	0	0.681	0.698
CXCR4	ITGAM	9606.ENSP00000386884	9606.ENSP00000496959	0	0	0	0	0.163	0	0	0.673	0.715
CXCR4	PECAM1	9606.ENSP00000386884	9606.ENSP00000457421	0	0	0	0	0.183	0.242	0	0.679	0.784
CXCR4	TNF	9606.ENSP00000386884	9606.ENSP00000398698	0	0	0	0	0.131	0	0	0.795	0.814
CYBB	TNFRSF1A	9606.ENSP00000367851	9606.ENSP00000162749	0	0	0	0	0.06	0.292	0	0.35	0.53
CYBB	HMOX1	9606.ENSP00000367851	9606.ENSP00000216117	0	0	0	0	0.072	0	0	0.703	0.712
CYBB	NFKBIA	9606.ENSP00000367851	9606.ENSP00000216797	0	0	0	0	0.124	0.045	0	0.455	0.504
CYBB	MMP2	9606.ENSP00000367851	9606.ENSP00000219070	0	0	0	0	0.069	0	0.9	0.581	0.957
CYBB	TGFB1	9606.ENSP00000367851	9606.ENSP00000221930	0	0	0	0	0.133	0	0	0.554	0.597
CYBB	SPI1	9606.ENSP00000367851	9606.ENSP00000227163	0	0	0	0	0.513	0	0	0.322	0.655
CYBB	IL10RA	9606.ENSP00000367851	9606.ENSP00000227752	0	0	0	0	0.405	0	0	0.507	0.694
CYBB	SLC11A1	9606.ENSP00000367851	9606.ENSP00000233202	0	0	0	0	0.204	0	0	0.512	0.595
CYBB	TLR2	9606.ENSP00000367851	9606.ENSP00000260010	0	0	0	0	0.24	0.045	0	0.729	0.786
CYBB	IL1B	9606.ENSP00000367851	9606.ENSP00000263341	0	0	0	0	0.181	0	0	0.702	0.746
CYBB	STAT3	9606.ENSP00000367851	9606.ENSP00000264657	0	0	0	0	0.052	0	0	0.521	0.527
CYBB	ICAM1	9606.ENSP00000367851	9606.ENSP00000264832	0	0	0	0	0.144	0	0	0.583	0.627
CYBB	IRF8	9606.ENSP00000367851	9606.ENSP00000268638	0	0	0	0	0.391	0	0	0.657	0.782
CYBB	NCF1	9606.ENSP00000367851	9606.ENSP00000289473	0	0	0	0	0.344	0	0.9	0.999	0.999
CYBB	NOS2	9606.ENSP00000367851	9606.ENSP00000327251	0	0	0	0	0	0	0	0.607	0.607
CYBB	NLRP3	9606.ENSP00000367851	9606.ENSP00000337383	0	0	0	0	0.156	0.059	0	0.507	0.574
CYBB	FN1	9606.ENSP00000367851	9606.ENSP00000346839	0	0	0	0	0.057	0	0	0.449	0.459
CYBB	ITGAL	9606.ENSP00000367851	9606.ENSP00000349252	0	0	0	0	0.36	0	0	0.204	0.468
CYBB	STAT1	9606.ENSP00000367851	9606.ENSP00000354394	0	0	0	0	0.173	0	0	0.492	0.562
CYBB	PTGS2	9606.ENSP00000367851	9606.ENSP00000356438	0	0	0	0	0.088	0.052	0	0.678	0.698
CYBB	TREM2	9606.ENSP00000367851	9606.ENSP00000362205	0	0	0	0	0.128	0	0	0.377	0.434
CYBB	TLR4	9606.ENSP00000367851	9606.ENSP00000363089	0	0	0	0	0.269	0.045	0	0.871	0.902
CYBB	GPR84	9606.ENSP00000367851	9606.ENSP00000450310	0	0	0	0	0.202	0	0	0.322	0.436
CYBB	PECAM1	9606.ENSP00000367851	9606.ENSP00000457421	0	0	0	0	0.215	0	0	0.392	0.502
CYBB	ITGAX	9606.ENSP00000367851	9606.ENSP00000454623	0	0	0	0	0.265	0	0	0.39	0.533
CYBB	NFE2L2	9606.ENSP00000367851	9606.ENSP00000380252	0	0	0	0	0.088	0	0	0.6	0.62
CYBB	TNF	9606.ENSP00000367851	9606.ENSP00000398698	0	0	0	0	0.168	0	0	0.679	0.721
CYBB	MYD88	9606.ENSP00000367851	9606.ENSP00000498321	0	0	0	0	0.121	0.095	0	0.698	0.739
CYBB	ITGAM	9606.ENSP00000367851	9606.ENSP00000496959	0	0	0	0	0.492	0	0	0.581	0.778
DCX	GFAP	9606.ENSP00000490614	9606.ENSP00000253408	0	0	0	0	0.062	0.072	0	0.856	0.864
DCX	FGF2	9606.ENSP00000490614	9606.ENSP00000264498	0	0	0	0	0	0	0	0.611	0.611
DCX	MAPKAPK2	9606.ENSP00000490614	9606.ENSP00000356070	0	0.775	0	0	0	0	0	0	0.775
DCX	TH	9606.ENSP00000490614	9606.ENSP00000370571	0	0	0	0	0.042	0	0	0.689	0.689
ENG	TNFRSF1A	9606.ENSP00000362299	9606.ENSP00000162749	0	0	0	0	0.152	0	0	0.406	0.475
ENG	MMP2	9606.ENSP00000362299	9606.ENSP00000219070	0	0	0	0	0.136	0	0	0.418	0.475
ENG	TGFB1	9606.ENSP00000362299	9606.ENSP00000221930	0	0	0	0	0.172	0.591	0	0.997	0.998
ENG	HGF	9606.ENSP00000362299	9606.ENSP00000222390	0	0	0	0	0.107	0	0	0.613	0.639
ENG	GFAP	9606.ENSP00000362299	9606.ENSP00000253408	0	0	0	0	0.06	0	0	0.4	0.411
ENG	FLT4	9606.ENSP00000362299	9606.ENSP00000261937	0	0	0	0	0.121	0	0	0.434	0.481
ENG	IL1B	9606.ENSP00000362299	9606.ENSP00000263341	0	0	0	0	0.08	0	0	0.571	0.588
ENG	FGF2	9606.ENSP00000362299	9606.ENSP00000264498	0	0	0	0	0.042	0	0	0.831	0.831
ENG	ICAM1	9606.ENSP00000362299	9606.ENSP00000264832	0	0	0	0	0.158	0	0	0.735	0.767
ENG	ITGA5	9606.ENSP00000362299	9606.ENSP00000293379	0	0	0	0	0.204	0.301	0	0.672	0.801
ENG	MMP14	9606.ENSP00000362299	9606.ENSP00000308208	0	0	0	0	0.164	0.201	0	0.371	0.543
ENG	FN1	9606.ENSP00000362299	9606.ENSP00000346839	0	0	0	0	0.086	0	0	0.608	0.626
ENG	TGFBR2	9606.ENSP00000362299	9606.ENSP00000351905	0	0	0	0	0.198	0.63	0	0.992	0.997
ENG	PTGS2	9606.ENSP00000362299	9606.ENSP00000356438	0	0	0	0	0.085	0	0	0.53	0.551
ENG	SLC2A1	9606.ENSP00000362299	9606.ENSP00000416293	0	0	0	0	0	0	0	0.41	0.41
ENG	ITGAX	9606.ENSP00000362299	9606.ENSP00000454623	0	0	0	0	0.063	0.045	0	0.396	0.412
ENG	MYC	9606.ENSP00000362299	9606.ENSP00000478887	0	0	0	0	0.042	0	0	0.43	0.43
ENG	TLR4	9606.ENSP00000362299	9606.ENSP00000363089	0	0	0	0	0.122	0	0	0.402	0.453
ENG	IL1R1	9606.ENSP00000362299	9606.ENSP00000386380	0	0	0.329	0	0.097	0	0	0.187	0.464
ENG	FAS	9606.ENSP00000362299	9606.ENSP00000498466	0	0	0	0	0	0	0	0.478	0.478
ENG	SLC18A3	9606.ENSP00000362299	9606.ENSP00000363229	0	0	0	0	0	0	0	0.496	0.495
ENG	MMP12	9606.ENSP00000362299	9606.ENSP00000458585	0	0	0	0	0.062	0	0	0.507	0.517
ENG	TNF	9606.ENSP00000362299	9606.ENSP00000398698	0	0	0	0	0	0	0	0.58	0.58
ENG	ICAM2	9606.ENSP00000362299	9606.ENSP00000415283	0	0	0	0	0.177	0	0	0.569	0.63
ENG	ITGAM	9606.ENSP00000362299	9606.ENSP00000496959	0	0	0	0	0.064	0.045	0	0.79	0.795
ENG	PECAM1	9606.ENSP00000362299	9606.ENSP00000457421	0	0	0.245	0	0.197	0	0	0.883	0.923
ENTPD2	PLCB2	9606.ENSP00000347213	9606.ENSP00000260402	0	0	0	0	0.048	0	0	0.571	0.574
FAS	TNFRSF1A	9606.ENSP00000498466	9606.ENSP00000162749	0	0	0	0	0.056	0.448	0.9	0.994	0.999
FAS	NFKBIA	9606.ENSP00000498466	9606.ENSP00000216797	0	0	0	0	0.133	0	0	0.395	0.453
FAS	TGFB1	9606.ENSP00000498466	9606.ENSP00000221930	0	0	0	0	0.114	0	0	0.373	0.421
FAS	IL1B	9606.ENSP00000498466	9606.ENSP00000263341	0	0	0	0	0.131	0	0	0.692	0.72
FAS	STAT3	9606.ENSP00000498466	9606.ENSP00000264657	0	0	0	0	0.107	0	0	0.452	0.49
FAS	ICAM1	9606.ENSP00000498466	9606.ENSP00000264832	0	0	0	0	0.155	0	0	0.507	0.565
FAS	ITGAL	9606.ENSP00000498466	9606.ENSP00000349252	0	0	0	0	0.1	0	0	0.476	0.508
FAS	MSN	9606.ENSP00000498466	9606.ENSP00000353408	0	0	0	0	0.049	0.452	0	0.422	0.672
FAS	STAT1	9606.ENSP00000498466	9606.ENSP00000354394	0	0	0	0	0.167	0	0	0.402	0.481
FAS	FASLG	9606.ENSP00000498466	9606.ENSP00000356694	0	0	0	0	0.056	0.874	0.9	0.999	0.999
FAS	TLR4	9606.ENSP00000498466	9606.ENSP00000363089	0	0	0	0	0.192	0	0	0.418	0.51
FAS	TNFRSF1B	9606.ENSP00000498466	9606.ENSP00000365435	0	0	0	0	0.121	0	0	0.644	0.673
FAS	RELA	9606.ENSP00000498466	9606.ENSP00000384273	0	0	0	0	0.11	0.294	0	0.29	0.515
FAS	IL1R1	9606.ENSP00000498466	9606.ENSP00000386380	0	0	0	0	0.097	0	0	0.482	0.512
FAS	TNF	9606.ENSP00000498466	9606.ENSP00000398698	0	0	0	0	0.128	0.292	0	0.997	0.997
FAS	ITGAX	9606.ENSP00000498466	9606.ENSP00000454623	0	0	0	0	0.117	0	0	0.544	0.581
FAS	PECAM1	9606.ENSP00000498466	9606.ENSP00000457421	0	0	0	0	0.126	0	0	0.378	0.433
FAS	MYC	9606.ENSP00000498466	9606.ENSP00000478887	0	0	0	0	0.086	0	0	0.603	0.621
FAS	ITGAM	9606.ENSP00000498466	9606.ENSP00000496959	0	0	0	0	0.135	0	0	0.508	0.556
FAS	MYD88	9606.ENSP00000498466	9606.ENSP00000498321	0	0	0	0	0.141	0	0	0.347	0.416
FASLG	TNFRSF1A	9606.ENSP00000356694	9606.ENSP00000162749	0	0	0	0	0	0.617	0	0.997	0.998
FASLG	HMOX1	9606.ENSP00000356694	9606.ENSP00000216117	0	0	0	0	0.042	0	0	0.615	0.616
FASLG	NFKBIA	9606.ENSP00000356694	9606.ENSP00000216797	0	0	0	0	0.056	0.046	0	0.474	0.485
FASLG	MMP2	9606.ENSP00000356694	9606.ENSP00000219070	0	0	0	0	0	0	0	0.459	0.459
FASLG	TGFB1	9606.ENSP00000356694	9606.ENSP00000221930	0	0	0	0	0	0.071	0	0.716	0.724
FASLG	HGF	9606.ENSP00000356694	9606.ENSP00000222390	0	0	0	0	0	0	0	0.425	0.425
FASLG	LTBR	9606.ENSP00000356694	9606.ENSP00000228918	0	0	0	0	0	0	0	0.738	0.738
FASLG	TLR2	9606.ENSP00000356694	9606.ENSP00000260010	0	0	0	0	0.085	0.1	0	0.657	0.693
FASLG	IL1B	9606.ENSP00000356694	9606.ENSP00000263341	0	0	0	0	0.049	0	0	0.799	0.8
FASLG	FGF2	9606.ENSP00000356694	9606.ENSP00000264498	0	0	0	0	0	0	0	0.445	0.445
FASLG	STAT3	9606.ENSP00000356694	9606.ENSP00000264657	0	0	0	0	0.049	0	0.75	0.589	0.893
FASLG	ICAM1	9606.ENSP00000356694	9606.ENSP00000264832	0	0	0	0	0.088	0	0	0.766	0.777
FASLG	NLRP3	9606.ENSP00000356694	9606.ENSP00000337383	0	0	0	0	0.102	0.1	0	0.364	0.441
FASLG	FN1	9606.ENSP00000356694	9606.ENSP00000346839	0	0	0	0	0	0.601	0	0.781	0.909
FASLG	ITGAL	9606.ENSP00000356694	9606.ENSP00000349252	0	0	0	0	0.087	0	0	0.629	0.646
FASLG	MSN	9606.ENSP00000356694	9606.ENSP00000353408	0	0	0	0	0	0.448	0	0.146	0.508
FASLG	STAT1	9606.ENSP00000356694	9606.ENSP00000354394	0	0	0	0	0.069	0	0	0.515	0.529
FASLG	PTGS2	9606.ENSP00000356694	9606.ENSP00000356438	0	0	0	0	0.042	0	0	0.447	0.447
FASLG	RELA	9606.ENSP00000356694	9606.ENSP00000384273	0	0	0	0	0	0.091	0	0.377	0.409
FASLG	ITGAX	9606.ENSP00000356694	9606.ENSP00000454623	0	0	0	0	0.076	0	0	0.48	0.498
FASLG	MYC	9606.ENSP00000356694	9606.ENSP00000478887	0	0	0	0	0	0	0	0.507	0.507
FASLG	MYD88	9606.ENSP00000356694	9606.ENSP00000498321	0	0	0	0	0.053	0.045	0	0.571	0.578
FASLG	IL1R1	9606.ENSP00000356694	9606.ENSP00000386380	0	0	0	0	0	0	0	0.59	0.59
FASLG	TLR4	9606.ENSP00000356694	9606.ENSP00000363089	0	0	0	0	0.072	0.1	0	0.549	0.591
FASLG	ITGAM	9606.ENSP00000356694	9606.ENSP00000496959	0	0	0	0	0.082	0	0	0.703	0.715
FASLG	TNFRSF1B	9606.ENSP00000356694	9606.ENSP00000365435	0	0	0	0	0.072	0	0	0.776	0.783
FASLG	TNF	9606.ENSP00000356694	9606.ENSP00000398698	0	0	0	0.663	0.085	0.053	0	0.983	0.984
FGF2	HMOX1	9606.ENSP00000264498	9606.ENSP00000216117	0	0	0	0	0	0	0	0.464	0.464
FGF2	MMP2	9606.ENSP00000264498	9606.ENSP00000219070	0	0	0	0	0.083	0	0.4	0.669	0.802
FGF2	TGFB1	9606.ENSP00000264498	9606.ENSP00000221930	0	0	0	0	0.062	0	0.4	0.97	0.982
FGF2	HGF	9606.ENSP00000264498	9606.ENSP00000222390	0	0	0	0	0.054	0	0.4	0.927	0.955
FGF2	LOX	9606.ENSP00000264498	9606.ENSP00000231004	0	0	0	0	0.083	0.042	0	0.496	0.519
FGF2	GFAP	9606.ENSP00000264498	9606.ENSP00000253408	0	0	0	0	0.062	0	0	0.754	0.759
FGF2	TLR2	9606.ENSP00000264498	9606.ENSP00000260010	0	0	0	0	0.06	0	0	0.504	0.513
FGF2	FLT4	9606.ENSP00000264498	9606.ENSP00000261937	0	0	0	0	0.055	0.168	0.65	0.814	0.942
FGF2	IL1B	9606.ENSP00000264498	9606.ENSP00000263341	0	0	0	0	0.076	0	0	0.892	0.896
FGF2	ITGA5	9606.ENSP00000264498	9606.ENSP00000293379	0	0	0	0	0.091	0	0	0.377	0.409
FGF2	STAT1	9606.ENSP00000264498	9606.ENSP00000354394	0	0	0	0	0	0	0	0.413	0.413
FGF2	ITGAM	9606.ENSP00000264498	9606.ENSP00000496959	0	0	0	0	0.055	0	0	0.545	0.551
FGF2	TH	9606.ENSP00000264498	9606.ENSP00000370571	0	0	0	0	0	0	0	0.574	0.574
FGF2	SLC2A1	9606.ENSP00000264498	9606.ENSP00000416293	0	0	0	0	0.054	0	0	0.608	0.613
FGF2	TLR4	9606.ENSP00000264498	9606.ENSP00000363089	0	0	0	0	0.072	0	0	0.644	0.655
FGF2	TGFBR2	9606.ENSP00000264498	9606.ENSP00000351905	0	0	0	0	0	0	0	0.657	0.657
FGF2	MMP14	9606.ENSP00000264498	9606.ENSP00000308208	0	0	0	0	0.069	0	0	0.68	0.689
FGF2	MYC	9606.ENSP00000264498	9606.ENSP00000478887	0	0	0	0	0.042	0	0	0.708	0.708
FGF2	TNF	9606.ENSP00000264498	9606.ENSP00000398698	0	0	0	0	0	0	0	0.732	0.732
FGF2	ICAM1	9606.ENSP00000264498	9606.ENSP00000264832	0	0	0	0	0.081	0	0	0.741	0.752
FGF2	PTGS2	9606.ENSP00000264498	9606.ENSP00000356438	0	0	0	0	0.104	0	0	0.775	0.79
FGF2	PECAM1	9606.ENSP00000264498	9606.ENSP00000457421	0	0	0	0	0.087	0	0	0.791	0.801
FGF2	STAT3	9606.ENSP00000264498	9606.ENSP00000264657	0	0	0	0	0	0	0.5	0.684	0.835
FGF2	FN1	9606.ENSP00000264498	9606.ENSP00000346839	0	0	0	0	0.084	0	0	0.964	0.965
FLT4	TGFB1	9606.ENSP00000261937	9606.ENSP00000221930	0	0	0	0	0.049	0.063	0	0.404	0.423
FLT4	HGF	9606.ENSP00000261937	9606.ENSP00000222390	0	0	0	0	0.044	0	0.65	0.688	0.886
FLT4	PLCB2	9606.ENSP00000261937	9606.ENSP00000260402	0	0	0	0	0.06	0	0.65	0.127	0.687
FLT4	STAT3	9606.ENSP00000261937	9606.ENSP00000264657	0	0	0	0	0.058	0.079	0	0.406	0.439
FLT4	TNF	9606.ENSP00000261937	9606.ENSP00000398698	0	0	0	0	0.056	0.132	0	0.412	0.476
FLT4	FN1	9606.ENSP00000261937	9606.ENSP00000346839	0	0	0	0	0	0	0	0.48	0.48
FLT4	ITGA5	9606.ENSP00000261937	9606.ENSP00000293379	0	0	0	0	0.067	0	0	0.579	0.591
FLT4	PECAM1	9606.ENSP00000261937	9606.ENSP00000457421	0	0	0	0	0.081	0.045	0	0.937	0.94
FN1	HMOX1	9606.ENSP00000346839	9606.ENSP00000216117	0	0	0	0	0.048	0	0	0.475	0.479
FN1	NFKBIA	9606.ENSP00000346839	9606.ENSP00000216797	0	0	0	0	0	0	0	0.474	0.474
FN1	MMP2	9606.ENSP00000346839	9606.ENSP00000219070	0	0	0.104	0.615	0.255	0.24	0	0.577	0.756
FN1	TGFB1	9606.ENSP00000346839	9606.ENSP00000221930	0	0	0	0	0.049	0	0	0.969	0.969
FN1	HGF	9606.ENSP00000346839	9606.ENSP00000222390	0	0	0	0	0.055	0.394	0	0.947	0.967
FN1	LOX	9606.ENSP00000346839	9606.ENSP00000231004	0	0	0	0	0.233	0.591	0	0.799	0.931
FN1	GFAP	9606.ENSP00000346839	9606.ENSP00000253408	0	0	0	0	0	0	0	0.57	0.57
FN1	TLR2	9606.ENSP00000346839	9606.ENSP00000260010	0	0	0	0	0.043	0	0	0.917	0.917
FN1	IL1B	9606.ENSP00000346839	9606.ENSP00000263341	0	0	0	0	0.055	0.051	0	0.866	0.869
FN1	STAT3	9606.ENSP00000346839	9606.ENSP00000264657	0	0	0	0	0	0.9	0.5	0.796	0.988
FN1	ICAM1	9606.ENSP00000346839	9606.ENSP00000264832	0	0	0	0	0.055	0	0	0.903	0.904
FN1	ITGA5	9606.ENSP00000346839	9606.ENSP00000293379	0	0	0	0	0.11	0.986	0.9	0.998	0.999
FN1	MMP14	9606.ENSP00000346839	9606.ENSP00000308208	0	0	0	0	0.183	0	0	0.787	0.818
FN1	STAB1	9606.ENSP00000346839	9606.ENSP00000312946	0	0	0	0	0.044	0.292	0	0.249	0.447
FN1	LRRC25	9606.ENSP00000346839	9606.ENSP00000340983	0	0	0	0	0	0	0	0.457	0.457
FN1	RELA	9606.ENSP00000346839	9606.ENSP00000384273	0	0	0	0	0	0.143	0	0.37	0.437
FN1	ICAM2	9606.ENSP00000346839	9606.ENSP00000415283	0	0	0	0	0.057	0	0	0.432	0.441
FN1	MYD88	9606.ENSP00000346839	9606.ENSP00000498321	0	0	0	0	0.055	0	0	0.446	0.454
FN1	PTGS2	9606.ENSP00000346839	9606.ENSP00000356438	0	0	0	0	0	0	0	0.544	0.544
FN1	STAT1	9606.ENSP00000346839	9606.ENSP00000354394	0	0	0	0	0.044	0	0	0.602	0.603
FN1	MMP12	9606.ENSP00000346839	9606.ENSP00000458585	0	0	0	0	0.05	0	0	0.705	0.707
FN1	TGFBR2	9606.ENSP00000346839	9606.ENSP00000351905	0	0	0	0	0.085	0	0	0.708	0.722
FN1	MSN	9606.ENSP00000346839	9606.ENSP00000353408	0	0	0	0	0.049	0.071	0.5	0.479	0.739
FN1	PECAM1	9606.ENSP00000346839	9606.ENSP00000457421	0	0	0	0	0.049	0.092	0	0.731	0.748
FN1	MYC	9606.ENSP00000346839	9606.ENSP00000478887	0	0	0	0	0.046	0.216	0	0.724	0.775
FN1	ITGAL	9606.ENSP00000346839	9606.ENSP00000349252	0	0	0	0	0	0	0.65	0.447	0.798
FN1	ITGAM	9606.ENSP00000346839	9606.ENSP00000496959	0	0	0	0	0.047	0	0.65	0.595	0.853
FN1	ITGAX	9606.ENSP00000346839	9606.ENSP00000454623	0	0	0	0	0.044	0	0.65	0.631	0.865
FN1	TNF	9606.ENSP00000346839	9606.ENSP00000398698	0	0	0	0	0.057	0	0	0.97	0.97
FN1	TLR4	9606.ENSP00000346839	9606.ENSP00000363089	0	0	0	0	0.049	0	0	0.995	0.995
GBA	GRN	9606.ENSP00000314508	9606.ENSP00000053867	0	0	0	0	0.295	0	0	0.385	0.548
GBA	NAGLU	9606.ENSP00000314508	9606.ENSP00000225927	0	0	0	0	0.072	0	0	0.454	0.471
GBA	STAT3	9606.ENSP00000314508	9606.ENSP00000264657	0	0	0	0	0.061	0	0.4	0.125	0.463
GBA	GUSB	9606.ENSP00000314508	9606.ENSP00000302728	0.095	0	0	0	0.103	0	0	0.457	0.521
GBA	MAN2B1	9606.ENSP00000314508	9606.ENSP00000395473	0	0	0	0	0.145	0	0	0.439	0.5
GBA	NPC2	9606.ENSP00000314508	9606.ENSP00000451206	0	0	0	0	0.119	0	0	0.457	0.502
GFAP	HMOX1	9606.ENSP00000253408	9606.ENSP00000216117	0	0	0	0	0	0	0	0.451	0.451
GFAP	TGFB1	9606.ENSP00000253408	9606.ENSP00000221930	0	0	0	0	0.055	0.079	0	0.475	0.503
GFAP	LOX	9606.ENSP00000253408	9606.ENSP00000231004	0	0	0	0	0	0.067	0	0.422	0.437
GFAP	TLR2	9606.ENSP00000253408	9606.ENSP00000260010	0	0	0	0	0	0	0	0.404	0.404
GFAP	STAT1	9606.ENSP00000253408	9606.ENSP00000354394	0	0	0	0	0.052	0.164	0	0.335	0.427
GFAP	IL6R	9606.ENSP00000253408	9606.ENSP00000357470	0	0	0	0	0.057	0	0	0.432	0.441
GFAP	PTGS2	9606.ENSP00000253408	9606.ENSP00000356438	0	0	0	0	0.058	0	0	0.443	0.453
GFAP	NLRP3	9606.ENSP00000253408	9606.ENSP00000337383	0	0	0	0	0	0.046	0	0.482	0.484
GFAP	ICAM1	9606.ENSP00000253408	9606.ENSP00000264832	0	0	0	0	0.087	0	0	0.467	0.493
GFAP	MYC	9606.ENSP00000253408	9606.ENSP00000478887	0	0	0	0	0.086	0	0	0.479	0.503
GFAP	TSPO	9606.ENSP00000253408	9606.ENSP00000379563	0	0	0	0	0.087	0	0	0.527	0.55
GFAP	STAT3	9606.ENSP00000253408	9606.ENSP00000264657	0	0	0	0	0.052	0	0	0.585	0.59
GFAP	TMEM119	9606.ENSP00000253408	9606.ENSP00000376553	0	0	0	0	0	0	0	0.593	0.593
GFAP	TREM2	9606.ENSP00000253408	9606.ENSP00000362205	0	0	0	0	0.159	0	0	0.544	0.6
GFAP	TLR4	9606.ENSP00000253408	9606.ENSP00000363089	0	0	0	0	0	0.226	0	0.544	0.632
GFAP	PECAM1	9606.ENSP00000253408	9606.ENSP00000457421	0	0	0	0	0	0.139	0	0.648	0.684
GFAP	TNF	9606.ENSP00000253408	9606.ENSP00000398698	0	0	0	0	0.086	0.091	0	0.674	0.705
GFAP	ITGAM	9606.ENSP00000253408	9606.ENSP00000496959	0	0	0	0	0.073	0	0	0.705	0.715
GFAP	TH	9606.ENSP00000253408	9606.ENSP00000370571	0	0	0	0	0.087	0	0	0.775	0.786
GFAP	IL1B	9606.ENSP00000253408	9606.ENSP00000263341	0	0	0	0	0.067	0	0	0.815	0.82
GPR84	IL1B	9606.ENSP00000450310	9606.ENSP00000263341	0	0	0	0	0.35	0	0	0.273	0.507
GPR84	TNF	9606.ENSP00000450310	9606.ENSP00000398698	0	0	0	0	0.376	0	0	0.271	0.525
GPR84	ITGAM	9606.ENSP00000450310	9606.ENSP00000496959	0	0	0	0	0.228	0	0	0.371	0.494
GRIN2C	P2RX4	9606.ENSP00000293190	9606.ENSP00000353032	0	0	0	0	0.057	0	0.9	0.079	0.905
GRIN2C	P2RX7	9606.ENSP00000293190	9606.ENSP00000330696	0	0	0	0	0.057	0	0.9	0.09	0.906
GRN	MMP19	9606.ENSP00000053867	9606.ENSP00000313437	0	0	0	0	0.067	0	0	0.436	0.451
GRN	TNF	9606.ENSP00000053867	9606.ENSP00000398698	0	0	0	0	0.044	0	0	0.484	0.486
GRN	NAPSA	9606.ENSP00000053867	9606.ENSP00000253719	0	0	0	0	0.055	0.421	0	0.161	0.5
GRN	MAN2B1	9606.ENSP00000053867	9606.ENSP00000395473	0	0	0	0	0.448	0	0	0.164	0.519
GRN	NPC2	9606.ENSP00000053867	9606.ENSP00000451206	0	0	0	0	0.452	0	0	0.164	0.523
GRN	TREM2	9606.ENSP00000053867	9606.ENSP00000362205	0	0	0	0	0.068	0	0	0.541	0.553
GRN	TNFRSF1B	9606.ENSP00000053867	9606.ENSP00000365435	0	0	0	0	0.074	0.413	0	0.633	0.783
GRN	TNFRSF1A	9606.ENSP00000053867	9606.ENSP00000162749	0	0	0	0	0.144	0.405	0	0.644	0.803
GUSB	TGFB1	9606.ENSP00000302728	9606.ENSP00000221930	0	0	0	0	0.042	0	0	0.489	0.489
GUSB	HGF	9606.ENSP00000302728	9606.ENSP00000222390	0	0	0	0	0	0	0	0.492	0.491
GUSB	NAGLU	9606.ENSP00000302728	9606.ENSP00000225927	0	0	0	0	0.103	0	0	0.57	0.597
GUSB	HEXB	9606.ENSP00000302728	9606.ENSP00000261416	0.095	0	0	0	0.231	0.095	0	0.251	0.465
GUSB	IL1B	9606.ENSP00000302728	9606.ENSP00000263341	0	0	0	0	0	0	0	0.435	0.435
GUSB	MYC	9606.ENSP00000302728	9606.ENSP00000478887	0	0	0	0	0.059	0	0	0.398	0.409
GUSB	TNF	9606.ENSP00000302728	9606.ENSP00000398698	0	0	0	0	0	0	0	0.446	0.446
GUSB	MAN2B1	9606.ENSP00000302728	9606.ENSP00000395473	0	0	0	0	0.253	0.096	0	0.501	0.634
HEXB	TMEM119	9606.ENSP00000261416	9606.ENSP00000376553	0	0	0	0	0	0	0	0.417	0.417
HEXB	NPC2	9606.ENSP00000261416	9606.ENSP00000451206	0	0	0	0	0.378	0	0	0.137	0.441
HEXB	MAN2B1	9606.ENSP00000261416	9606.ENSP00000395473	0	0	0	0	0.148	0.091	0	0.341	0.445
HGF	TNFRSF1A	9606.ENSP00000222390	9606.ENSP00000162749	0	0	0	0	0.044	0	0	0.578	0.579
HGF	HMOX1	9606.ENSP00000222390	9606.ENSP00000216117	0	0	0	0	0	0	0	0.442	0.442
HGF	MMP2	9606.ENSP00000222390	9606.ENSP00000219070	0	0	0	0	0.097	0	0.4	0.593	0.76
HGF	TGFB1	9606.ENSP00000222390	9606.ENSP00000221930	0	0	0	0	0.064	0	0.4	0.871	0.921
HGF	LOX	9606.ENSP00000222390	9606.ENSP00000231004	0	0	0	0	0.063	0.094	0	0.371	0.419
HGF	TLR4	9606.ENSP00000222390	9606.ENSP00000363089	0	0	0	0	0.106	0	0	0.413	0.453
HGF	MMP14	9606.ENSP00000222390	9606.ENSP00000308208	0	0	0	0	0.085	0	0	0.433	0.459
HGF	TGFBR2	9606.ENSP00000222390	9606.ENSP00000351905	0	0	0	0	0.074	0.096	0	0.417	0.469
HGF	ITGAM	9606.ENSP00000222390	9606.ENSP00000496959	0	0	0	0	0.074	0	0	0.453	0.472
HGF	ICAM1	9606.ENSP00000222390	9606.ENSP00000264832	0	0	0	0	0.067	0	0	0.511	0.524
HGF	MMP12	9606.ENSP00000222390	9606.ENSP00000458585	0	0	0	0	0.055	0	0	0.531	0.537
HGF	PTGS2	9606.ENSP00000222390	9606.ENSP00000356438	0	0	0	0	0.107	0	0	0.529	0.561
HGF	MYC	9606.ENSP00000222390	9606.ENSP00000478887	0	0	0	0	0	0.229	0	0.527	0.62
HGF	PECAM1	9606.ENSP00000222390	9606.ENSP00000457421	0	0	0	0	0.067	0.113	0	0.608	0.647
HGF	TNF	9606.ENSP00000222390	9606.ENSP00000398698	0	0	0	0	0	0.066	0	0.671	0.679
HGF	IL1B	9606.ENSP00000222390	9606.ENSP00000263341	0	0	0	0	0.083	0	0	0.67	0.685
HGF	STAT3	9606.ENSP00000222390	9606.ENSP00000264657	0	0	0	0	0	0	0.5	0.673	0.829
HMOX1	TNFRSF1A	9606.ENSP00000216117	9606.ENSP00000162749	0	0	0	0	0.141	0	0	0.37	0.435
HMOX1	RELA	9606.ENSP00000216117	9606.ENSP00000384273	0	0	0	0	0.06	0	0	0.388	0.4
HMOX1	LOX	9606.ENSP00000216117	9606.ENSP00000231004	0	0	0	0	0	0	0	0.402	0.402
HMOX1	PECAM1	9606.ENSP00000216117	9606.ENSP00000457421	0	0	0	0	0.056	0	0	0.421	0.43
HMOX1	MYC	9606.ENSP00000216117	9606.ENSP00000478887	0	0	0	0	0.047	0	0	0.435	0.438
HMOX1	SLC11A1	9606.ENSP00000216117	9606.ENSP00000233202	0	0	0	0	0.133	0	0	0.389	0.448
HMOX1	TH	9606.ENSP00000216117	9606.ENSP00000370571	0	0	0	0	0.087	0	0	0.435	0.462
HMOX1	ITGAM	9606.ENSP00000216117	9606.ENSP00000496959	0	0	0	0	0.079	0	0	0.447	0.468
HMOX1	TLR2	9606.ENSP00000216117	9606.ENSP00000260010	0	0	0	0	0.081	0	0	0.474	0.496
HMOX1	MMP2	9606.ENSP00000216117	9606.ENSP00000219070	0	0	0	0	0.042	0	0	0.505	0.506
HMOX1	NCF1	9606.ENSP00000216117	9606.ENSP00000289473	0	0	0	0	0.079	0	0	0.513	0.532
HMOX1	STAT1	9606.ENSP00000216117	9606.ENSP00000354394	0	0	0	0	0.049	0	0	0.533	0.537
HMOX1	MYD88	9606.ENSP00000216117	9606.ENSP00000498321	0	0	0	0	0.07	0	0	0.539	0.553
HMOX1	HPGDS	9606.ENSP00000216117	9606.ENSP00000295256	0	0	0	0	0	0	0	0.6	0.6
HMOX1	TGFB1	9606.ENSP00000216117	9606.ENSP00000221930	0	0	0	0	0.083	0	0	0.63	0.646
HMOX1	ICAM1	9606.ENSP00000216117	9606.ENSP00000264832	0	0	0	0	0.08	0	0	0.662	0.675
HMOX1	NFKBIA	9606.ENSP00000216117	9606.ENSP00000216797	0	0	0	0	0.057	0	0	0.669	0.675
HMOX1	NOS2	9606.ENSP00000216117	9606.ENSP00000327251	0	0	0	0	0	0.186	0	0.666	0.716
HMOX1	TLR4	9606.ENSP00000216117	9606.ENSP00000363089	0	0	0	0	0.074	0	0	0.709	0.719
HMOX1	PTGS2	9606.ENSP00000216117	9606.ENSP00000356438	0	0	0	0	0.073	0	0	0.782	0.789
HMOX1	TNF	9606.ENSP00000216117	9606.ENSP00000398698	0	0	0	0	0.044	0	0	0.792	0.792
HMOX1	IL1B	9606.ENSP00000216117	9606.ENSP00000263341	0	0	0	0	0.067	0	0	0.812	0.817
HMOX1	STAT3	9606.ENSP00000216117	9606.ENSP00000264657	0	0	0	0	0.056	0	0.4	0.755	0.849
HMOX1	NLRP3	9606.ENSP00000216117	9606.ENSP00000337383	0	0	0	0	0.056	0	0.75	0.582	0.892
HMOX1	NFE2L2	9606.ENSP00000216117	9606.ENSP00000380252	0	0	0	0	0.05	0	0.75	0.96	0.989
HPGDS	NFE2L2	9606.ENSP00000295256	9606.ENSP00000380252	0	0	0	0	0.055	0	0	0.611	0.617
HPGDS	PTGS2	9606.ENSP00000295256	9606.ENSP00000356438	0	0	0	0	0	0	0.9	0.468	0.944
ICAM1	TNFRSF1A	9606.ENSP00000264832	9606.ENSP00000162749	0	0	0	0	0.066	0	0	0.736	0.742
ICAM1	NFKBIA	9606.ENSP00000264832	9606.ENSP00000216797	0	0	0	0	0.321	0	0	0.713	0.797
ICAM1	MMP2	9606.ENSP00000264832	9606.ENSP00000219070	0	0	0	0	0.049	0	0	0.749	0.751
ICAM1	TGFB1	9606.ENSP00000264832	9606.ENSP00000221930	0	0	0	0	0.151	0	0	0.695	0.73
ICAM1	LTBR	9606.ENSP00000264832	9606.ENSP00000228918	0	0	0	0	0.141	0	0	0.641	0.679
ICAM1	LOX	9606.ENSP00000264832	9606.ENSP00000231004	0	0	0	0	0.042	0	0	0.415	0.416
ICAM1	TLR2	9606.ENSP00000264832	9606.ENSP00000260010	0	0	0	0	0.175	0	0	0.667	0.714
ICAM1	IL1B	9606.ENSP00000264832	9606.ENSP00000263341	0	0	0	0	0.271	0	0	0.885	0.912
ICAM1	STAT3	9606.ENSP00000264832	9606.ENSP00000264657	0	0	0	0	0.122	0	0.5	0.649	0.832
ICAM1	IL15RA	9606.ENSP00000264832	9606.ENSP00000380421	0	0	0	0	0.211	0	0	0.304	0.427
ICAM1	MMP14	9606.ENSP00000264832	9606.ENSP00000308208	0	0	0	0	0.146	0	0	0.371	0.44
ICAM1	NCF1	9606.ENSP00000264832	9606.ENSP00000289473	0	0	0	0	0.08	0	0	0.461	0.484
ICAM1	NFE2L2	9606.ENSP00000264832	9606.ENSP00000380252	0	0	0	0	0.049	0	0	0.5	0.504
ICAM1	NLRP3	9606.ENSP00000264832	9606.ENSP00000337383	0	0	0	0	0.127	0	0	0.505	0.549
ICAM1	MYC	9606.ENSP00000264832	9606.ENSP00000478887	0	0	0	0	0.09	0	0	0.585	0.606
ICAM1	NOS2	9606.ENSP00000264832	9606.ENSP00000327251	0	0	0	0	0.074	0.166	0	0.533	0.608
ICAM1	MYD88	9606.ENSP00000264832	9606.ENSP00000498321	0	0	0	0	0.111	0	0	0.593	0.623
ICAM1	IL6R	9606.ENSP00000264832	9606.ENSP00000357470	0	0	0	0	0.062	0	0.4	0.479	0.681
ICAM1	ITGA5	9606.ENSP00000264832	9606.ENSP00000293379	0	0	0	0	0.119	0	0	0.699	0.723
ICAM1	TNFRSF1B	9606.ENSP00000264832	9606.ENSP00000365435	0	0	0	0	0.176	0	0.4	0.543	0.754
ICAM1	TLR4	9606.ENSP00000264832	9606.ENSP00000363089	0	0	0	0	0.14	0	0	0.741	0.768
ICAM1	STAT1	9606.ENSP00000264832	9606.ENSP00000354394	0	0	0	0	0.116	0	0.5	0.594	0.805
ICAM1	IL1R1	9606.ENSP00000264832	9606.ENSP00000386380	0	0	0	0	0.084	0	0.4	0.684	0.811
ICAM1	PTGS2	9606.ENSP00000264832	9606.ENSP00000356438	0	0	0	0	0.151	0	0	0.814	0.835
ICAM1	RELA	9606.ENSP00000264832	9606.ENSP00000384273	0	0	0	0	0.173	0.626	0	0.57	0.855
ICAM1	PECAM1	9606.ENSP00000264832	9606.ENSP00000457421	0	0	0	0	0.123	0	0	0.861	0.873
ICAM1	TNF	9606.ENSP00000264832	9606.ENSP00000398698	0	0	0	0	0.255	0	0	0.929	0.944
ICAM1	ITGAX	9606.ENSP00000264832	9606.ENSP00000454623	0	0	0	0	0.152	0	0	0.979	0.982
ICAM1	MSN	9606.ENSP00000264832	9606.ENSP00000353408	0	0	0	0	0.083	0.089	0.9	0.91	0.991
ICAM1	ICAM2	9606.ENSP00000264832	9606.ENSP00000415283	0	0	0.098	0.71	0.09	0	0.9	0.917	0.992
ICAM1	ITGAL	9606.ENSP00000264832	9606.ENSP00000349252	0	0	0	0	0.124	0.983	0.9	0.997	0.999
ICAM1	ITGAM	9606.ENSP00000264832	9606.ENSP00000496959	0	0	0	0	0.133	0.292	0.9	0.996	0.999
ICAM2	IL1B	9606.ENSP00000415283	9606.ENSP00000263341	0	0	0	0	0.049	0	0	0.419	0.423
ICAM2	ITGA5	9606.ENSP00000415283	9606.ENSP00000293379	0	0	0	0	0.112	0	0	0.507	0.543
ICAM2	ITGAL	9606.ENSP00000415283	9606.ENSP00000349252	0	0	0	0	0.114	0	0.9	0.994	0.999
ICAM2	MSN	9606.ENSP00000415283	9606.ENSP00000353408	0	0	0	0	0.082	0.345	0	0.85	0.901
ICAM2	TLR4	9606.ENSP00000415283	9606.ENSP00000363089	0	0	0	0	0.106	0	0	0.521	0.554
ICAM2	TNF	9606.ENSP00000415283	9606.ENSP00000398698	0	0	0	0	0.118	0	0	0.446	0.49
ICAM2	ITGAX	9606.ENSP00000415283	9606.ENSP00000454623	0	0	0	0	0.133	0	0	0.417	0.473
ICAM2	PECAM1	9606.ENSP00000415283	9606.ENSP00000457421	0	0	0	0	0.306	0	0	0.801	0.856
ICAM2	ITGAM	9606.ENSP00000415283	9606.ENSP00000496959	0	0	0	0	0.12	0	0.9	0.968	0.996
IL10RA	TNFRSF1A	9606.ENSP00000227752	9606.ENSP00000162749	0	0	0	0	0.058	0	0	0.616	0.622
IL10RA	NFKBIA	9606.ENSP00000227752	9606.ENSP00000216797	0	0	0	0	0.139	0	0	0.363	0.428
IL10RA	TGFB1	9606.ENSP00000227752	9606.ENSP00000221930	0	0	0	0	0.143	0	0	0.618	0.658
IL10RA	SPI1	9606.ENSP00000227752	9606.ENSP00000227163	0	0	0	0	0.382	0	0	0.2	0.484
IL10RA	MYD88	9606.ENSP00000227752	9606.ENSP00000498321	0	0	0	0	0.179	0	0	0.398	0.484
IL10RA	TLR4	9606.ENSP00000227752	9606.ENSP00000363089	0	0	0	0	0.183	0	0	0.454	0.535
IL10RA	ITGAL	9606.ENSP00000227752	9606.ENSP00000349252	0	0	0	0	0.429	0	0	0.244	0.55
IL10RA	IL15RA	9606.ENSP00000227752	9606.ENSP00000380421	0	0	0	0	0.084	0	0	0.541	0.561
IL10RA	TLR2	9606.ENSP00000227752	9606.ENSP00000260010	0	0	0	0	0.264	0	0	0.432	0.564
IL10RA	ITGAX	9606.ENSP00000227752	9606.ENSP00000454623	0	0	0	0	0.276	0	0	0.448	0.583
IL10RA	IRF8	9606.ENSP00000227752	9606.ENSP00000268638	0	0	0	0	0.456	0	0	0.349	0.631
IL10RA	ITGAM	9606.ENSP00000227752	9606.ENSP00000496959	0	0	0	0	0.379	0	0	0.47	0.656
IL10RA	IL1R1	9606.ENSP00000227752	9606.ENSP00000386380	0	0	0	0	0.044	0	0	0.668	0.669
IL10RA	TNFRSF1B	9606.ENSP00000227752	9606.ENSP00000365435	0	0	0	0	0.353	0	0	0.593	0.726
IL10RA	IL13RA1	9606.ENSP00000227752	9606.ENSP00000360730	0	0	0	0	0.049	0	0	0.724	0.726
IL10RA	IL6R	9606.ENSP00000227752	9606.ENSP00000357470	0	0	0	0	0.138	0	0	0.765	0.789
IL10RA	IL1B	9606.ENSP00000227752	9606.ENSP00000263341	0	0	0	0	0.168	0	0	0.759	0.791
IL10RA	IL4R	9606.ENSP00000227752	9606.ENSP00000379111	0	0	0.211	0	0.134	0	0	0.734	0.802
IL10RA	STAT1	9606.ENSP00000227752	9606.ENSP00000354394	0	0	0	0	0.125	0.087	0	0.841	0.861
IL10RA	TNF	9606.ENSP00000227752	9606.ENSP00000398698	0	0	0	0	0.2	0	0	0.837	0.864
IL10RA	STAT3	9606.ENSP00000227752	9606.ENSP00000264657	0	0	0	0	0.062	0.095	0.5	0.967	0.984
IL13RA1	TNFRSF1A	9606.ENSP00000360730	9606.ENSP00000162749	0	0	0	0	0.176	0	0	0.483	0.556
IL13RA1	TGFB1	9606.ENSP00000360730	9606.ENSP00000221930	0	0	0	0	0.077	0	0	0.557	0.573
IL13RA1	IL1B	9606.ENSP00000360730	9606.ENSP00000263341	0	0	0	0	0.06	0	0	0.606	0.613
IL13RA1	STAT3	9606.ENSP00000360730	9606.ENSP00000264657	0	0	0	0	0.095	0	0.5	0.608	0.807
IL13RA1	TGFBR2	9606.ENSP00000360730	9606.ENSP00000351905	0	0	0	0	0.147	0	0	0.428	0.491
IL13RA1	STAT1	9606.ENSP00000360730	9606.ENSP00000354394	0	0	0	0	0.103	0	0.5	0.37	0.692
IL13RA1	IL6R	9606.ENSP00000360730	9606.ENSP00000357470	0	0	0	0	0.113	0	0	0.805	0.819
IL13RA1	TLR4	9606.ENSP00000360730	9606.ENSP00000363089	0	0	0	0	0.174	0	0	0.315	0.41
IL13RA1	TNFRSF1B	9606.ENSP00000360730	9606.ENSP00000365435	0	0	0	0	0.095	0	0	0.476	0.506
IL13RA1	TNF	9606.ENSP00000360730	9606.ENSP00000398698	0	0	0	0	0.083	0	0	0.604	0.621
IL13RA1	IL1R1	9606.ENSP00000360730	9606.ENSP00000386380	0	0	0.231	0	0.147	0	0	0.592	0.709
IL13RA1	IL4R	9606.ENSP00000360730	9606.ENSP00000379111	0	0	0.207	0	0.063	0.946	0.8	0.999	0.999
IL15RA	IL1B	9606.ENSP00000380421	9606.ENSP00000263341	0	0	0	0	0.105	0	0	0.608	0.634
IL15RA	STAT3	9606.ENSP00000380421	9606.ENSP00000264657	0	0	0	0	0.062	0	0.5	0.379	0.683
IL15RA	TGFBR2	9606.ENSP00000380421	9606.ENSP00000351905	0	0	0	0	0.082	0	0	0.375	0.401
IL15RA	STAT1	9606.ENSP00000380421	9606.ENSP00000354394	0	0	0	0	0.127	0	0	0.369	0.425
IL15RA	IL6R	9606.ENSP00000380421	9606.ENSP00000357470	0	0	0	0	0.06	0	0	0.486	0.496
IL15RA	IL4R	9606.ENSP00000380421	9606.ENSP00000379111	0	0	0	0	0.103	0	0	0.599	0.624
IL15RA	ITGAX	9606.ENSP00000380421	9606.ENSP00000454623	0	0	0	0	0.058	0	0	0.401	0.411
IL15RA	ITGAM	9606.ENSP00000380421	9606.ENSP00000496959	0	0	0	0	0.074	0	0	0.418	0.438
IL15RA	TNF	9606.ENSP00000380421	9606.ENSP00000398698	0	0	0	0	0.099	0	0	0.657	0.677
IL1B	TNFRSF1A	9606.ENSP00000263341	9606.ENSP00000162749	0	0	0	0	0.056	0	0	0.997	0.997
IL1B	NFKBIA	9606.ENSP00000263341	9606.ENSP00000216797	0	0	0	0	0.283	0	0	0.927	0.945
IL1B	MMP2	9606.ENSP00000263341	9606.ENSP00000219070	0	0	0	0	0.079	0.087	0	0.721	0.745
IL1B	TGFB1	9606.ENSP00000263341	9606.ENSP00000221930	0	0	0	0	0.14	0	0	0.924	0.932
IL1B	PFN1	9606.ENSP00000263341	9606.ENSP00000225655	0	0	0	0	0	0	0	0.543	0.543
IL1B	SPI1	9606.ENSP00000263341	9606.ENSP00000227163	0	0	0	0	0.159	0	0	0.573	0.626
IL1B	LTBR	9606.ENSP00000263341	9606.ENSP00000228918	0	0	0	0	0.072	0	0	0.404	0.423
IL1B	LOX	9606.ENSP00000263341	9606.ENSP00000231004	0	0	0	0	0.042	0	0	0.727	0.727
IL1B	SLC11A1	9606.ENSP00000263341	9606.ENSP00000233202	0	0	0	0	0.16	0	0	0.395	0.47
IL1B	TLR2	9606.ENSP00000263341	9606.ENSP00000260010	0	0	0	0	0.259	0	0	0.96	0.969
IL1B	IL37	9606.ENSP00000263341	9606.ENSP00000263326	0	0	0	0	0.051	0	0	0.851	0.852
IL1B	PSMB9	9606.ENSP00000263341	9606.ENSP00000363993	0	0	0	0	0.139	0	0	0.333	0.401
IL1B	MARCO	9606.ENSP00000263341	9606.ENSP00000318916	0	0	0	0	0.113	0	0	0.365	0.412
IL1B	PSMB8	9606.ENSP00000263341	9606.ENSP00000364016	0	0	0	0	0.145	0	0	0.366	0.434
IL1B	MAPKAPK2	9606.ENSP00000263341	9606.ENSP00000356070	0	0	0	0	0.044	0	0	0.435	0.436
IL1B	TMEM119	9606.ENSP00000263341	9606.ENSP00000376553	0	0	0	0	0	0	0	0.456	0.456
IL1B	SLC2A1	9606.ENSP00000263341	9606.ENSP00000416293	0	0	0	0	0.062	0	0	0.475	0.486
IL1B	TGFBR2	9606.ENSP00000263341	9606.ENSP00000351905	0	0	0	0	0.072	0	0	0.476	0.492
IL1B	P2RX4	9606.ENSP00000263341	9606.ENSP00000353032	0	0	0	0	0.047	0	0	0.505	0.508
IL1B	MMP14	9606.ENSP00000263341	9606.ENSP00000308208	0	0	0	0	0.092	0.051	0	0.481	0.514
IL1B	PLA2G4A	9606.ENSP00000263341	9606.ENSP00000356436	0	0	0	0	0.114	0	0	0.479	0.518
IL1B	IRF8	9606.ENSP00000263341	9606.ENSP00000268638	0	0	0	0	0.144	0	0	0.507	0.559
IL1B	ITGAL	9606.ENSP00000263341	9606.ENSP00000349252	0	0	0	0	0.162	0	0	0.526	0.587
IL1B	TSPO	9606.ENSP00000263341	9606.ENSP00000379563	0	0	0	0	0.062	0	0	0.625	0.633
IL1B	TH	9606.ENSP00000263341	9606.ENSP00000370571	0	0	0	0	0	0	0	0.661	0.661
IL1B	TREM2	9606.ENSP00000263341	9606.ENSP00000362205	0	0	0	0	0.126	0	0	0.636	0.668
IL1B	P2RX7	9606.ENSP00000263341	9606.ENSP00000330696	0	0	0	0	0.058	0	0	0.666	0.671
IL1B	NCF1	9606.ENSP00000263341	9606.ENSP00000289473	0	0	0	0	0.262	0	0	0.581	0.677
IL1B	PECAM1	9606.ENSP00000263341	9606.ENSP00000457421	0	0	0	0	0.14	0	0	0.667	0.701
IL1B	IL4R	9606.ENSP00000263341	9606.ENSP00000379111	0	0	0	0	0.101	0	0	0.73	0.746
IL1B	NFE2L2	9606.ENSP00000263341	9606.ENSP00000380252	0	0	0	0	0.097	0	0	0.733	0.749
IL1B	MMP12	9606.ENSP00000263341	9606.ENSP00000458585	0	0	0	0	0.12	0.071	0	0.729	0.759
IL1B	MYC	9606.ENSP00000263341	9606.ENSP00000478887	0	0	0	0	0.113	0.129	0	0.736	0.778
IL1B	NOS2	9606.ENSP00000263341	9606.ENSP00000327251	0	0	0	0	0.073	0	0	0.796	0.803
IL1B	ITGAX	9606.ENSP00000263341	9606.ENSP00000454623	0	0	0	0	0.168	0	0	0.775	0.805
IL1B	STAT1	9606.ENSP00000263341	9606.ENSP00000354394	0	0	0	0	0.107	0	0	0.834	0.846
IL1B	ITGAM	9606.ENSP00000263341	9606.ENSP00000496959	0	0	0	0	0.194	0	0	0.825	0.853
IL1B	TNFRSF1B	9606.ENSP00000263341	9606.ENSP00000365435	0	0	0	0	0.198	0	0	0.898	0.914
IL1B	STAT3	9606.ENSP00000263341	9606.ENSP00000264657	0	0	0	0	0.069	0	0.5	0.877	0.938
IL1B	PTGS2	9606.ENSP00000263341	9606.ENSP00000356438	0	0	0	0	0.656	0	0	0.928	0.974
IL1B	IL6R	9606.ENSP00000263341	9606.ENSP00000357470	0	0	0	0	0.094	0	0	0.973	0.975
IL1B	TLR4	9606.ENSP00000263341	9606.ENSP00000363089	0	0	0	0	0.181	0	0	0.984	0.986
IL1B	RELA	9606.ENSP00000263341	9606.ENSP00000384273	0	0	0	0	0.118	0	0.9	0.903	0.99
IL1B	NLRP3	9606.ENSP00000263341	9606.ENSP00000337383	0	0	0	0	0.339	0.312	0.9	0.947	0.997
IL1B	TNF	9606.ENSP00000263341	9606.ENSP00000398698	0	0	0	0	0.616	0	0.4	0.993	0.998
IL1B	MYD88	9606.ENSP00000263341	9606.ENSP00000498321	0	0	0	0	0.115	0	0.5	0.998	0.999
IL1B	IL1R1	9606.ENSP00000263341	9606.ENSP00000386380	0	0	0	0	0.087	0.96	0.9	0.999	0.999
IL1R1	TNFRSF1A	9606.ENSP00000386380	9606.ENSP00000162749	0	0	0	0	0.097	0	0	0.917	0.921
IL1R1	NFKBIA	9606.ENSP00000386380	9606.ENSP00000216797	0	0	0	0	0.049	0	0	0.692	0.694
IL1R1	TGFB1	9606.ENSP00000386380	9606.ENSP00000221930	0	0	0	0	0.059	0	0	0.505	0.514
IL1R1	TLR2	9606.ENSP00000386380	9606.ENSP00000260010	0	0	0	0	0.138	0	0	0.852	0.867
IL1R1	IL37	9606.ENSP00000386380	9606.ENSP00000263326	0	0	0	0	0.055	0	0	0.72	0.724
IL1R1	STAT3	9606.ENSP00000386380	9606.ENSP00000264657	0	0	0	0	0.115	0.069	0.5	0.588	0.807
IL1R1	NLRP3	9606.ENSP00000386380	9606.ENSP00000337383	0	0	0	0	0.05	0	0	0.804	0.806
IL1R1	TGFBR2	9606.ENSP00000386380	9606.ENSP00000351905	0	0	0	0	0.145	0.045	0	0.545	0.596
IL1R1	STAT1	9606.ENSP00000386380	9606.ENSP00000354394	0	0	0	0	0.09	0.053	0	0.537	0.567
IL1R1	PTGS2	9606.ENSP00000386380	9606.ENSP00000356438	0	0	0	0	0.162	0	0	0.507	0.569
IL1R1	IL6R	9606.ENSP00000386380	9606.ENSP00000357470	0	0	0	0	0.119	0	0	0.82	0.834
IL1R1	TLR4	9606.ENSP00000386380	9606.ENSP00000363089	0	0	0	0	0.174	0	0	0.935	0.944
IL1R1	TNFRSF1B	9606.ENSP00000386380	9606.ENSP00000365435	0	0	0	0	0.063	0	0	0.697	0.703
IL1R1	IL4R	9606.ENSP00000386380	9606.ENSP00000379111	0	0	0	0	0.079	0.045	0	0.686	0.699
IL1R1	RELA	9606.ENSP00000386380	9606.ENSP00000384273	0	0	0	0	0	0	0	0.446	0.446
IL1R1	ITGAX	9606.ENSP00000386380	9606.ENSP00000454623	0	0	0	0	0.107	0	0	0.506	0.54
IL1R1	ITGAM	9606.ENSP00000386380	9606.ENSP00000496959	0	0	0	0	0.075	0	0	0.574	0.589
IL1R1	TNF	9606.ENSP00000386380	9606.ENSP00000398698	0	0	0	0	0	0	0	0.996	0.996
IL1R1	MYD88	9606.ENSP00000386380	9606.ENSP00000498321	0	0	0	0	0.043	0.829	0.9	0.998	0.999
IL37	TGFB1	9606.ENSP00000263326	9606.ENSP00000221930	0	0	0	0	0.054	0	0	0.407	0.415
IL37	NLRP3	9606.ENSP00000263326	9606.ENSP00000337383	0	0	0	0	0	0	0	0.435	0.435
IL37	TLR4	9606.ENSP00000263326	9606.ENSP00000363089	0	0	0	0	0	0	0	0.437	0.437
IL37	MYD88	9606.ENSP00000263326	9606.ENSP00000498321	0	0	0	0	0.061	0	0	0.513	0.523
IL37	TNF	9606.ENSP00000263326	9606.ENSP00000398698	0	0	0	0	0.074	0	0	0.582	0.596
IL37	STAT3	9606.ENSP00000263326	9606.ENSP00000264657	0	0	0	0	0.044	0	0.5	0.4	0.688
IL4R	TNFRSF1A	9606.ENSP00000379111	9606.ENSP00000162749	0	0	0	0	0.139	0.047	0	0.412	0.475
IL4R	TGFB1	9606.ENSP00000379111	9606.ENSP00000221930	0	0	0	0	0.099	0.126	0	0.482	0.557
IL4R	TLR2	9606.ENSP00000379111	9606.ENSP00000260010	0	0	0	0	0.178	0.1	0	0.417	0.531
IL4R	STAT3	9606.ENSP00000379111	9606.ENSP00000264657	0	0	0	0	0.111	0.096	0.5	0.581	0.809
IL4R	IRF8	9606.ENSP00000379111	9606.ENSP00000268638	0	0	0	0	0.074	0.094	0	0.345	0.402
IL4R	NCF1	9606.ENSP00000379111	9606.ENSP00000289473	0	0	0	0	0.099	0.336	0	0.18	0.467
IL4R	NOS2	9606.ENSP00000379111	9606.ENSP00000327251	0	0	0	0	0.051	0.045	0	0.436	0.444
IL4R	TGFBR2	9606.ENSP00000379111	9606.ENSP00000351905	0	0	0	0	0.156	0	0	0.524	0.581
IL4R	STAT1	9606.ENSP00000379111	9606.ENSP00000354394	0	0	0	0	0.1	0.096	0.5	0.519	0.778
IL4R	IL6R	9606.ENSP00000379111	9606.ENSP00000357470	0	0	0	0	0.1	0	0	0.817	0.828
IL4R	TREM2	9606.ENSP00000379111	9606.ENSP00000362205	0	0	0.249	0	0.049	0	0	0.255	0.421
IL4R	TLR4	9606.ENSP00000379111	9606.ENSP00000363089	0	0	0	0	0.12	0.1	0	0.474	0.547
IL4R	TNFRSF1B	9606.ENSP00000379111	9606.ENSP00000365435	0	0	0	0	0.118	0	0	0.501	0.541
IL4R	MYD88	9606.ENSP00000379111	9606.ENSP00000498321	0	0	0	0	0.129	0.095	0	0.379	0.468
IL4R	ITGAX	9606.ENSP00000379111	9606.ENSP00000454623	0	0	0	0	0.11	0.058	0	0.526	0.568
IL4R	ITGAM	9606.ENSP00000379111	9606.ENSP00000496959	0	0	0	0	0.102	0.058	0	0.598	0.63
IL4R	TNF	9606.ENSP00000379111	9606.ENSP00000398698	0	0	0	0	0.124	0.057	0	0.605	0.645
IL6R	TNFRSF1A	9606.ENSP00000357470	9606.ENSP00000162749	0	0	0	0	0.067	0	0	0.914	0.916
IL6R	TGFB1	9606.ENSP00000357470	9606.ENSP00000221930	0	0	0	0	0.059	0	0	0.608	0.615
IL6R	TLR2	9606.ENSP00000357470	9606.ENSP00000260010	0	0	0	0	0.144	0	0	0.419	0.481
IL6R	STAT3	9606.ENSP00000357470	9606.ENSP00000264657	0	0	0	0	0.131	0.292	0.9	0.902	0.993
IL6R	OSMR	9606.ENSP00000357470	9606.ENSP00000274276	0	0	0.2	0	0.048	0	0	0.682	0.736
IL6R	TGFBR2	9606.ENSP00000357470	9606.ENSP00000351905	0	0	0	0	0.112	0	0	0.554	0.587
IL6R	STAT1	9606.ENSP00000357470	9606.ENSP00000354394	0	0	0	0	0.096	0	0.5	0.575	0.791
IL6R	PTGS2	9606.ENSP00000357470	9606.ENSP00000356438	0	0	0	0	0.124	0	0	0.428	0.478
IL6R	MYC	9606.ENSP00000357470	9606.ENSP00000478887	0	0	0	0	0.069	0	0	0.394	0.412
IL6R	ITGAX	9606.ENSP00000357470	9606.ENSP00000454623	0	0	0	0	0.137	0	0	0.37	0.433
IL6R	MMP12	9606.ENSP00000357470	9606.ENSP00000458585	0	0	0	0	0.051	0	0	0.454	0.459
IL6R	ITGAM	9606.ENSP00000357470	9606.ENSP00000496959	0	0	0	0	0.117	0	0	0.419	0.465
IL6R	MYD88	9606.ENSP00000357470	9606.ENSP00000498321	0	0	0	0	0.079	0	0	0.616	0.631
IL6R	TLR4	9606.ENSP00000357470	9606.ENSP00000363089	0	0	0	0	0.159	0	0	0.671	0.712
IL6R	TNFRSF1B	9606.ENSP00000357470	9606.ENSP00000365435	0	0	0	0	0.117	0	0.4	0.692	0.822
IL6R	TNF	9606.ENSP00000357470	9606.ENSP00000398698	0	0	0	0	0.117	0.203	0	0.976	0.982
IRF8	NFKBIA	9606.ENSP00000268638	9606.ENSP00000216797	0	0	0	0	0.12	0.059	0	0.336	0.402
IRF8	SPI1	9606.ENSP00000268638	9606.ENSP00000227163	0	0	0	0	0.484	0.635	0	0.998	0.999
IRF8	TLR2	9606.ENSP00000268638	9606.ENSP00000260010	0	0	0	0	0.196	0	0	0.446	0.536
IRF8	STAT3	9606.ENSP00000268638	9606.ENSP00000264657	0	0	0	0	0.088	0.071	0	0.687	0.711
IRF8	NCF1	9606.ENSP00000268638	9606.ENSP00000289473	0	0	0	0	0.271	0.064	0	0.192	0.401
IRF8	MYC	9606.ENSP00000268638	9606.ENSP00000478887	0	0	0	0	0.107	0	0	0.396	0.438
IRF8	TREM2	9606.ENSP00000268638	9606.ENSP00000362205	0	0	0	0	0.111	0	0	0.465	0.504
IRF8	TLR4	9606.ENSP00000268638	9606.ENSP00000363089	0	0	0	0	0.178	0	0	0.485	0.559
IRF8	RELA	9606.ENSP00000268638	9606.ENSP00000384273	0	0	0	0	0.055	0.328	0	0.403	0.588
IRF8	ITGAX	9606.ENSP00000268638	9606.ENSP00000454623	0	0	0	0	0.183	0	0	0.598	0.657
IRF8	MYD88	9606.ENSP00000268638	9606.ENSP00000498321	0	0	0	0	0.156	0.135	0	0.628	0.705
IRF8	ITGAM	9606.ENSP00000268638	9606.ENSP00000496959	0	0	0	0	0.326	0	0	0.621	0.733
IRF8	TNF	9606.ENSP00000268638	9606.ENSP00000398698	0	0	0	0	0.195	0	0	0.696	0.745
IRF8	STAT1	9606.ENSP00000268638	9606.ENSP00000354394	0	0	0	0	0.115	0.065	0.5	0.795	0.904
ITGA5	MMP2	9606.ENSP00000293379	9606.ENSP00000219070	0	0	0	0	0.142	0	0	0.42	0.481
ITGA5	TGFB1	9606.ENSP00000293379	9606.ENSP00000221930	0	0	0	0	0.216	0	0	0.475	0.571
ITGA5	LOX	9606.ENSP00000293379	9606.ENSP00000231004	0	0	0	0	0.182	0.045	0	0.3	0.405
ITGA5	TLR2	9606.ENSP00000293379	9606.ENSP00000260010	0	0	0	0	0.123	0.05	0	0.355	0.415
ITGA5	TGFBR2	9606.ENSP00000293379	9606.ENSP00000351905	0	0	0	0	0.18	0.058	0	0.316	0.426
ITGA5	MMP14	9606.ENSP00000293379	9606.ENSP00000308208	0	0	0	0	0.187	0	0	0.349	0.448
ITGA5	PECAM1	9606.ENSP00000293379	9606.ENSP00000457421	0	0	0	0	0.125	0.067	0	0.508	0.563
ITGA5	ITGAM	9606.ENSP00000293379	9606.ENSP00000496959	0	0	0	0.581	0.1	0	0.54	0.205	0.642
ITGA5	ITGAX	9606.ENSP00000293379	9606.ENSP00000454623	0	0	0	0.587	0.121	0	0.72	0.168	0.777
ITGA5	ITGAL	9606.ENSP00000293379	9606.ENSP00000349252	0	0	0.11	0.576	0.062	0	0.9	0.513	0.953
ITGAL	SPI1	9606.ENSP00000349252	9606.ENSP00000227163	0	0	0	0	0.259	0	0	0.232	0.407
ITGAL	TLR2	9606.ENSP00000349252	9606.ENSP00000260010	0	0	0	0	0.148	0.05	0	0.357	0.434
ITGAL	TLR4	9606.ENSP00000349252	9606.ENSP00000363089	0	0	0	0	0.079	0.05	0	0.393	0.423
ITGAL	PECAM1	9606.ENSP00000349252	9606.ENSP00000457421	0	0	0	0	0.171	0.067	0	0.544	0.616
ITGAL	TNF	9606.ENSP00000349252	9606.ENSP00000398698	0	0	0.204	0	0.153	0	0	0.605	0.71
ITGAL	ITGAX	9606.ENSP00000349252	9606.ENSP00000454623	0	0	0.086	0.796	0.264	0	0.72	0.775	0.951
ITGAL	ITGAM	9606.ENSP00000349252	9606.ENSP00000496959	0	0	0.084	0.807	0.225	0	0.9	0.93	0.994
ITGAM	TNFRSF1A	9606.ENSP00000496959	9606.ENSP00000162749	0	0	0	0	0.075	0	0	0.633	0.646
ITGAM	NFKBIA	9606.ENSP00000496959	9606.ENSP00000216797	0	0	0	0	0.143	0.071	0	0.507	0.573
ITGAM	MMP2	9606.ENSP00000496959	9606.ENSP00000219070	0	0	0	0	0.067	0	0	0.388	0.405
ITGAM	TGFB1	9606.ENSP00000496959	9606.ENSP00000221930	0	0	0	0	0.142	0	0	0.65	0.687
ITGAM	SPI1	9606.ENSP00000496959	9606.ENSP00000227163	0	0	0	0	0.468	0	0.9	0.614	0.977
ITGAM	LOX	9606.ENSP00000496959	9606.ENSP00000231004	0	0	0	0	0	0.045	0	0.668	0.669
ITGAM	SLC11A1	9606.ENSP00000496959	9606.ENSP00000233202	0	0	0	0	0.276	0	0	0.225	0.414
ITGAM	TLR2	9606.ENSP00000496959	9606.ENSP00000260010	0	0	0	0	0.268	0.05	0	0.859	0.893
ITGAM	PLCB2	9606.ENSP00000496959	9606.ENSP00000260402	0	0	0	0	0.379	0	0	0.125	0.433
ITGAM	STAT3	9606.ENSP00000496959	9606.ENSP00000264657	0	0	0	0	0.061	0	0.5	0.664	0.828
ITGAM	NCF1	9606.ENSP00000496959	9606.ENSP00000289473	0	0	0	0	0.295	0	0	0.432	0.582
ITGAM	STAB1	9606.ENSP00000496959	9606.ENSP00000312946	0	0	0	0	0.214	0	0	0.315	0.439
ITGAM	MARCO	9606.ENSP00000496959	9606.ENSP00000318916	0	0	0	0	0.214	0	0	0.3	0.426
ITGAM	NOS2	9606.ENSP00000496959	9606.ENSP00000327251	0	0	0	0	0.058	0	0	0.606	0.613
ITGAM	NLRP3	9606.ENSP00000496959	9606.ENSP00000337383	0	0	0	0	0.222	0.05	0	0.48	0.582
ITGAM	TGFBR2	9606.ENSP00000496959	9606.ENSP00000351905	0	0	0	0	0.108	0.058	0	0.36	0.415
ITGAM	STAT1	9606.ENSP00000496959	9606.ENSP00000354394	0	0	0	0	0.119	0	0.5	0.743	0.876
ITGAM	PTGS2	9606.ENSP00000496959	9606.ENSP00000356438	0	0	0	0	0.092	0	0	0.567	0.59
ITGAM	TREM2	9606.ENSP00000496959	9606.ENSP00000362205	0	0	0	0	0.152	0	0	0.581	0.629
ITGAM	TLR4	9606.ENSP00000496959	9606.ENSP00000363089	0	0	0	0	0.252	0.05	0	0.897	0.92
ITGAM	TNFRSF1B	9606.ENSP00000496959	9606.ENSP00000365435	0	0	0	0	0.227	0	0	0.349	0.475
ITGAM	TH	9606.ENSP00000496959	9606.ENSP00000370571	0	0	0	0	0	0	0	0.4	0.4
ITGAM	TMEM119	9606.ENSP00000496959	9606.ENSP00000376553	0	0	0	0	0.056	0	0	0.597	0.603
ITGAM	TSPO	9606.ENSP00000496959	9606.ENSP00000379563	0	0	0	0	0.08	0	0	0.436	0.459
ITGAM	RELA	9606.ENSP00000496959	9606.ENSP00000384273	0	0	0	0	0.104	0.045	0	0.449	0.488
ITGAM	TNF	9606.ENSP00000496959	9606.ENSP00000398698	0	0	0	0	0.177	0	0	0.894	0.909
ITGAM	ITGAX	9606.ENSP00000496959	9606.ENSP00000454623	0	0	0.059	0.961	0.402	0	0.54	0.077	0.729
ITGAM	PECAM1	9606.ENSP00000496959	9606.ENSP00000457421	0	0	0	0	0.258	0.067	0	0.782	0.836
ITGAM	MMP12	9606.ENSP00000496959	9606.ENSP00000458585	0	0	0	0	0.128	0	0	0.4	0.454
ITGAM	MYC	9606.ENSP00000496959	9606.ENSP00000478887	0	0	0	0	0.083	0	0	0.478	0.5
ITGAM	MYD88	9606.ENSP00000496959	9606.ENSP00000498321	0	0	0	0	0.151	0.051	0	0.768	0.796
ITGAX	TNFRSF1A	9606.ENSP00000454623	9606.ENSP00000162749	0	0	0	0	0.064	0	0	0.414	0.428
ITGAX	NFKBIA	9606.ENSP00000454623	9606.ENSP00000216797	0	0	0	0	0.111	0.071	0	0.4	0.461
ITGAX	TGFB1	9606.ENSP00000454623	9606.ENSP00000221930	0	0	0	0	0.141	0	0	0.58	0.624
ITGAX	SPI1	9606.ENSP00000454623	9606.ENSP00000227163	0	0	0	0	0.394	0	0	0.486	0.675
ITGAX	LTBR	9606.ENSP00000454623	9606.ENSP00000228918	0	0	0	0	0.106	0	0	0.419	0.458
ITGAX	SLC11A1	9606.ENSP00000454623	9606.ENSP00000233202	0	0	0	0	0.449	0	0	0.203	0.542
ITGAX	TLR2	9606.ENSP00000454623	9606.ENSP00000260010	0	0	0	0	0.256	0.05	0	0.692	0.763
ITGAX	STAT3	9606.ENSP00000454623	9606.ENSP00000264657	0	0	0	0	0.062	0	0.5	0.571	0.781
ITGAX	NCF1	9606.ENSP00000454623	9606.ENSP00000289473	0	0	0	0	0.302	0	0	0.252	0.455
ITGAX	NOS2	9606.ENSP00000454623	9606.ENSP00000327251	0	0	0	0	0.058	0	0	0.484	0.493
ITGAX	NLRP3	9606.ENSP00000454623	9606.ENSP00000337383	0	0	0	0	0.181	0.05	0	0.417	0.506
ITGAX	STAT1	9606.ENSP00000454623	9606.ENSP00000354394	0	0	0	0	0.087	0	0.5	0.728	0.865
ITGAX	PTGS2	9606.ENSP00000454623	9606.ENSP00000356438	0	0	0	0	0.113	0	0	0.37	0.417
ITGAX	TREM2	9606.ENSP00000454623	9606.ENSP00000362205	0	0	0	0	0.151	0	0	0.514	0.57
ITGAX	TLR4	9606.ENSP00000454623	9606.ENSP00000363089	0	0	0	0	0.179	0.05	0	0.728	0.769
ITGAX	TNFRSF1B	9606.ENSP00000454623	9606.ENSP00000365435	0	0	0	0	0.238	0	0	0.31	0.451
ITGAX	TMEM119	9606.ENSP00000454623	9606.ENSP00000376553	0	0	0	0	0.062	0	0	0.438	0.45
ITGAX	RELA	9606.ENSP00000454623	9606.ENSP00000384273	0	0	0	0	0.086	0.045	0	0.394	0.425
ITGAX	TNF	9606.ENSP00000454623	9606.ENSP00000398698	0	0	0	0	0.175	0	0	0.857	0.876
ITGAX	MMP12	9606.ENSP00000454623	9606.ENSP00000458585	0	0	0	0	0.149	0	0	0.348	0.421
ITGAX	MYD88	9606.ENSP00000454623	9606.ENSP00000498321	0	0	0	0	0.141	0.051	0	0.665	0.703
ITGAX	PECAM1	9606.ENSP00000454623	9606.ENSP00000457421	0	0	0	0	0.257	0.067	0	0.645	0.732
ITPR3	PLCB2	9606.ENSP00000363435	9606.ENSP00000260402	0	0	0	0	0.069	0.071	0.9	0.659	0.966
ITPR3	STAT3	9606.ENSP00000363435	9606.ENSP00000264657	0	0	0	0	0.042	0	0	0.546	0.546
LOX	MMP2	9606.ENSP00000231004	9606.ENSP00000219070	0	0	0	0	0.29	0.238	0	0.542	0.73
LOX	TGFB1	9606.ENSP00000231004	9606.ENSP00000221930	0	0	0	0	0.062	0.045	0	0.613	0.623
LOX	TH	9606.ENSP00000231004	9606.ENSP00000370571	0	0	0	0	0	0.045	0	0.414	0.417
LOX	SLC2A1	9606.ENSP00000231004	9606.ENSP00000416293	0	0	0	0	0.063	0.078	0	0.397	0.434
LOX	TLR4	9606.ENSP00000231004	9606.ENSP00000363089	0	0	0	0	0.049	0.125	0	0.425	0.48
LOX	TGFBR2	9606.ENSP00000231004	9606.ENSP00000351905	0	0	0	0	0.084	0.098	0	0.447	0.503
LOX	PECAM1	9606.ENSP00000231004	9606.ENSP00000457421	0	0	0	0	0.042	0.107	0	0.492	0.527
LOX	PLA2G4A	9606.ENSP00000231004	9606.ENSP00000356436	0	0	0	0	0.08	0.087	0	0.512	0.554
LOX	TNF	9606.ENSP00000231004	9606.ENSP00000398698	0	0	0	0	0	0.045	0	0.593	0.594
LOX	STAT3	9606.ENSP00000231004	9606.ENSP00000264657	0	0	0	0	0	0.079	0	0.65	0.664
LOX	MMP14	9606.ENSP00000231004	9606.ENSP00000308208	0	0	0	0	0.185	0	0	0.625	0.681
LOX	MYC	9606.ENSP00000231004	9606.ENSP00000478887	0	0	0	0	0.063	0.152	0	0.662	0.708
LOX	PTGS2	9606.ENSP00000231004	9606.ENSP00000356438	0	0	0	0	0.067	0	0	0.759	0.766
LRRC25	NCF1	9606.ENSP00000340983	9606.ENSP00000289473	0	0	0	0	0.403	0	0	0.055	0.412
LTBR	TNFRSF1A	9606.ENSP00000228918	9606.ENSP00000162749	0	0	0	0.584	0.628	0	0	0.59	0.841
LTBR	NFKBIA	9606.ENSP00000228918	9606.ENSP00000216797	0	0	0	0	0.089	0	0	0.629	0.647
LTBR	PSMB9	9606.ENSP00000228918	9606.ENSP00000363993	0	0	0	0	0.056	0	0.4	0.142	0.471
LTBR	MYC	9606.ENSP00000228918	9606.ENSP00000478887	0	0	0	0	0.052	0	0	0.478	0.484
LTBR	PSMB8	9606.ENSP00000228918	9606.ENSP00000364016	0	0	0	0	0.089	0	0.4	0.15	0.495
LTBR	STAT3	9606.ENSP00000228918	9606.ENSP00000264657	0	0	0	0	0.112	0	0	0.557	0.59
LTBR	RELA	9606.ENSP00000228918	9606.ENSP00000384273	0	0	0	0	0.122	0	0	0.59	0.625
LTBR	TNFRSF1B	9606.ENSP00000228918	9606.ENSP00000365435	0	0	0	0.622	0.091	0	0.5	0.741	0.872
LTBR	TNF	9606.ENSP00000228918	9606.ENSP00000398698	0	0	0	0	0.099	0.292	0.5	0.892	0.96
MAN2B1	NAGLU	9606.ENSP00000395473	9606.ENSP00000225927	0	0	0	0	0.179	0	0	0.584	0.644
MAN2B1	NPC2	9606.ENSP00000395473	9606.ENSP00000451206	0	0	0	0	0.111	0	0	0.451	0.491
MAPKAPK2	STAT3	9606.ENSP00000356070	9606.ENSP00000264657	0	0	0	0	0.096	0.198	0	0.322	0.465
MAPKAPK2	TNF	9606.ENSP00000356070	9606.ENSP00000398698	0	0	0	0	0.074	0	0	0.474	0.492
MARCO	TLR2	9606.ENSP00000318916	9606.ENSP00000260010	0	0	0	0	0.238	0.091	0	0.754	0.814
MARCO	TREM2	9606.ENSP00000318916	9606.ENSP00000362205	0	0	0	0	0.165	0	0	0.324	0.411
MARCO	TLR4	9606.ENSP00000318916	9606.ENSP00000363089	0	0	0	0	0.223	0.091	0	0.356	0.505
MMP12	MMP2	9606.ENSP00000458585	9606.ENSP00000219070	0	0	0	0.857	0.08	0	0.4	0.154	0.492
MMP12	TGFB1	9606.ENSP00000458585	9606.ENSP00000221930	0	0	0	0	0	0	0	0.724	0.724
MMP12	MMP19	9606.ENSP00000458585	9606.ENSP00000313437	0	0	0.139	0.763	0.164	0	0.4	0.166	0.592
MMP12	PTGS2	9606.ENSP00000458585	9606.ENSP00000356438	0	0	0	0	0.088	0	0	0.551	0.573
MMP12	TREM2	9606.ENSP00000458585	9606.ENSP00000362205	0	0	0	0	0.173	0	0	0.357	0.445
MMP12	TNF	9606.ENSP00000458585	9606.ENSP00000398698	0	0	0	0	0.087	0	0	0.711	0.725
MMP14	MMP2	9606.ENSP00000308208	9606.ENSP00000219070	0	0	0.084	0.758	0.381	0	0.9	0.961	0.997
MMP14	TGFB1	9606.ENSP00000308208	9606.ENSP00000221930	0	0	0	0	0.086	0	0	0.582	0.601
MMP14	STAT3	9606.ENSP00000308208	9606.ENSP00000264657	0	0	0	0	0.05	0	0	0.442	0.448
MMP14	PECAM1	9606.ENSP00000308208	9606.ENSP00000457421	0	0	0	0	0.042	0.092	0	0.38	0.413
MMP14	TNF	9606.ENSP00000308208	9606.ENSP00000398698	0	0	0	0	0.089	0	0	0.479	0.505
MMP14	MMP19	9606.ENSP00000308208	9606.ENSP00000313437	0	0	0.137	0.788	0.143	0	0	0.452	0.559
MMP14	TGFBR2	9606.ENSP00000308208	9606.ENSP00000351905	0	0	0	0	0.15	0	0	0.536	0.589
MMP14	PTGS2	9606.ENSP00000308208	9606.ENSP00000356438	0	0	0	0	0.108	0	0	0.572	0.602
MMP14	MYC	9606.ENSP00000308208	9606.ENSP00000478887	0	0	0	0	0.066	0.124	0	0.612	0.655
MMP19	MMP2	9606.ENSP00000313437	9606.ENSP00000219070	0	0	0	0.681	0.187	0	0.4	0.216	0.585
MMP2	NFKBIA	9606.ENSP00000219070	9606.ENSP00000216797	0	0	0	0	0	0	0	0.507	0.507
MMP2	RELA	9606.ENSP00000219070	9606.ENSP00000384273	0	0	0	0	0.061	0.071	0	0.367	0.4
MMP2	STAT1	9606.ENSP00000219070	9606.ENSP00000354394	0	0	0	0	0.085	0	0	0.384	0.412
MMP2	SLC2A1	9606.ENSP00000219070	9606.ENSP00000416293	0	0	0	0	0.053	0	0	0.419	0.426
MMP2	TGFBR2	9606.ENSP00000219070	9606.ENSP00000351905	0	0	0	0	0.091	0	0	0.475	0.502
MMP2	MYC	9606.ENSP00000219070	9606.ENSP00000478887	0	0	0	0	0.074	0	0	0.621	0.634
MMP2	TLR2	9606.ENSP00000219070	9606.ENSP00000260010	0	0	0	0	0.043	0	0	0.639	0.639
MMP2	TLR4	9606.ENSP00000219070	9606.ENSP00000363089	0	0	0	0	0.047	0	0	0.677	0.679
MMP2	TNF	9606.ENSP00000219070	9606.ENSP00000398698	0	0	0	0	0.074	0	0	0.72	0.729
MMP2	PECAM1	9606.ENSP00000219070	9606.ENSP00000457421	0	0	0	0	0.074	0.092	0	0.727	0.75
MMP2	PTGS2	9606.ENSP00000219070	9606.ENSP00000356438	0	0	0	0	0.079	0	0	0.755	0.764
MMP2	STAT3	9606.ENSP00000219070	9606.ENSP00000264657	0	0	0	0	0.074	0.226	0.5	0.793	0.916
MMP2	NCF1	9606.ENSP00000219070	9606.ENSP00000289473	0	0	0	0	0.056	0	0.9	0.3	0.928
MMP2	TGFB1	9606.ENSP00000219070	9606.ENSP00000221930	0	0	0	0	0.07	0.6	0.4	0.85	0.962
MSN	TNFRSF1A	9606.ENSP00000353408	9606.ENSP00000162749	0	0	0	0	0.141	0.448	0	0.103	0.537
MSN	PFN1	9606.ENSP00000353408	9606.ENSP00000225655	0	0	0	0	0.172	0	0	0.447	0.523
MSN	STAT3	9606.ENSP00000353408	9606.ENSP00000264657	0	0	0	0	0.128	0	0.5	0.295	0.665
MSN	NCF1	9606.ENSP00000353408	9606.ENSP00000289473	0	0	0	0	0.045	0.292	0	0.6	0.705
MSN	NFE2L2	9606.ENSP00000353408	9606.ENSP00000380252	0	0	0	0	0.042	0	0	0.401	0.401
MSN	MYD88	9606.ENSP00000353408	9606.ENSP00000498321	0	0	0	0	0.111	0	0	0.427	0.469
MSN	PECAM1	9606.ENSP00000353408	9606.ENSP00000457421	0	0	0	0	0.153	0	0	0.513	0.57
MYC	TNFRSF1A	9606.ENSP00000478887	9606.ENSP00000162749	0	0	0	0	0.048	0	0	0.627	0.629
MYC	NFKBIA	9606.ENSP00000478887	9606.ENSP00000216797	0	0	0	0	0.117	0	0	0.608	0.639
MYC	TGFB1	9606.ENSP00000478887	9606.ENSP00000221930	0	0	0	0	0.072	0.048	0	0.787	0.796
MYC	SPI1	9606.ENSP00000478887	9606.ENSP00000227163	0	0	0	0	0.043	0	0	0.575	0.576
MYC	STAT3	9606.ENSP00000478887	9606.ENSP00000264657	0	0	0	0	0.066	0.612	0.75	0.859	0.985
MYC	SP100	9606.ENSP00000478887	9606.ENSP00000343023	0	0	0	0	0	0.069	0	0.504	0.518
MYC	TGFBR2	9606.ENSP00000478887	9606.ENSP00000351905	0	0	0	0	0.055	0.087	0	0.543	0.571
MYC	STAT1	9606.ENSP00000478887	9606.ENSP00000354394	0	0	0	0	0.088	0.124	0	0.748	0.781
MYC	PTGS2	9606.ENSP00000478887	9606.ENSP00000356438	0	0	0	0	0.091	0	0	0.699	0.715
MYC	SGPL1	9606.ENSP00000478887	9606.ENSP00000362298	0	0	0	0	0	0.124	0	0.513	0.555
MYC	TLR4	9606.ENSP00000478887	9606.ENSP00000363089	0	0	0	0	0	0	0	0.473	0.473
MYC	NFE2L2	9606.ENSP00000478887	9606.ENSP00000380252	0	0	0	0	0.066	0.531	0.75	0.693	0.961
MYC	RELA	9606.ENSP00000478887	9606.ENSP00000384273	0	0	0	0	0.118	0.621	0	0.594	0.852
MYC	TNF	9606.ENSP00000478887	9606.ENSP00000398698	0	0	0	0	0.062	0	0	0.696	0.702
MYC	SLC2A1	9606.ENSP00000478887	9606.ENSP00000416293	0	0	0	0	0.073	0.124	0	0.661	0.7
MYC	PECAM1	9606.ENSP00000478887	9606.ENSP00000457421	0	0	0	0	0.049	0	0	0.511	0.515
MYC	MYD88	9606.ENSP00000478887	9606.ENSP00000498321	0	0	0	0	0.109	0	0	0.484	0.521
MYD88	TNFRSF1A	9606.ENSP00000498321	9606.ENSP00000162749	0	0	0	0	0.276	0	0	0.759	0.818
MYD88	NFKBIA	9606.ENSP00000498321	9606.ENSP00000216797	0	0	0	0	0.124	0.078	0.5	0.788	0.903
MYD88	TGFB1	9606.ENSP00000498321	9606.ENSP00000221930	0	0	0	0	0.123	0	0	0.526	0.566
MYD88	PFN1	9606.ENSP00000498321	9606.ENSP00000225655	0	0	0	0	0.097	0.06	0	0.412	0.458
MYD88	SPI1	9606.ENSP00000498321	9606.ENSP00000227163	0	0	0	0	0.092	0	0	0.418	0.449
MYD88	TLR2	9606.ENSP00000498321	9606.ENSP00000260010	0	0	0	0.579	0.184	0.746	0.9	0.99	0.999
MYD88	STAT3	9606.ENSP00000498321	9606.ENSP00000264657	0	0	0	0	0.202	0	0	0.805	0.838
MYD88	NCF1	9606.ENSP00000498321	9606.ENSP00000289473	0	0	0	0	0.086	0.091	0	0.372	0.433
MYD88	NOS2	9606.ENSP00000498321	9606.ENSP00000327251	0	0	0	0	0	0.067	0	0.534	0.546
MYD88	NLRP3	9606.ENSP00000498321	9606.ENSP00000337383	0	0	0	0	0.06	0.125	0	0.717	0.747
MYD88	TGFBR2	9606.ENSP00000498321	9606.ENSP00000351905	0	0	0	0	0.158	0.095	0	0.279	0.403
MYD88	STAT1	9606.ENSP00000498321	9606.ENSP00000354394	0	0	0	0	0.19	0	0	0.854	0.877
MYD88	PTGS2	9606.ENSP00000498321	9606.ENSP00000356438	0	0	0	0	0.087	0	0	0.729	0.742
MYD88	TLR4	9606.ENSP00000498321	9606.ENSP00000363089	0	0	0	0.582	0.158	0.974	0.9	0.992	0.999
MYD88	TNFRSF1B	9606.ENSP00000498321	9606.ENSP00000365435	0	0	0	0	0.163	0	0	0.323	0.409
MYD88	NFE2L2	9606.ENSP00000498321	9606.ENSP00000380252	0	0	0	0	0.117	0	0	0.397	0.446
MYD88	RELA	9606.ENSP00000498321	9606.ENSP00000384273	0	0	0	0	0.189	0.106	0.5	0.636	0.85
MYD88	TNF	9606.ENSP00000498321	9606.ENSP00000398698	0	0	0	0	0.129	0	0	0.933	0.939
NCF1	NFKBIA	9606.ENSP00000289473	9606.ENSP00000216797	0	0	0	0	0.063	0.042	0	0.418	0.432
NCF1	TGFB1	9606.ENSP00000289473	9606.ENSP00000221930	0	0	0	0	0.072	0	0	0.432	0.451
NCF1	SPI1	9606.ENSP00000289473	9606.ENSP00000227163	0	0	0	0	0.553	0	0	0.535	0.783
NCF1	TLR2	9606.ENSP00000289473	9606.ENSP00000260010	0	0	0	0	0.212	0	0	0.417	0.52
NCF1	PTGS2	9606.ENSP00000289473	9606.ENSP00000356438	0	0	0	0	0.075	0	0	0.405	0.426
NCF1	NOS2	9606.ENSP00000289473	9606.ENSP00000327251	0	0	0	0	0	0	0	0.433	0.433
NCF1	RELA	9606.ENSP00000289473	9606.ENSP00000384273	0	0	0	0	0.049	0.308	0	0.216	0.439
NCF1	NFE2L2	9606.ENSP00000289473	9606.ENSP00000380252	0	0	0	0	0.047	0.301	0	0.419	0.579
NCF1	TNF	9606.ENSP00000289473	9606.ENSP00000398698	0	0	0	0	0.158	0	0	0.585	0.636
NCF1	TLR4	9606.ENSP00000289473	9606.ENSP00000363089	0	0	0	0	0.162	0	0	0.694	0.733
NCF1	PLA2G4A	9606.ENSP00000289473	9606.ENSP00000356436	0	0	0	0	0	0.545	0	0.564	0.793
NFE2L2	TNFRSF1A	9606.ENSP00000380252	9606.ENSP00000162749	0	0	0	0	0.105	0	0	0.51	0.543
NFE2L2	NFKBIA	9606.ENSP00000380252	9606.ENSP00000216797	0	0	0	0	0.104	0	0	0.73	0.747
NFE2L2	TGFB1	9606.ENSP00000380252	9606.ENSP00000221930	0	0	0	0	0	0	0	0.556	0.556
NFE2L2	SPI1	9606.ENSP00000380252	9606.ENSP00000227163	0	0	0	0	0.089	0	0	0.456	0.484
NFE2L2	TLR2	9606.ENSP00000380252	9606.ENSP00000260010	0	0	0	0	0.087	0	0	0.377	0.408
NFE2L2	STAT3	9606.ENSP00000380252	9606.ENSP00000264657	0	0	0	0	0.14	0.324	0	0.592	0.742
NFE2L2	NOS2	9606.ENSP00000380252	9606.ENSP00000327251	0	0	0	0	0	0	0	0.475	0.475
NFE2L2	NLRP3	9606.ENSP00000380252	9606.ENSP00000337383	0	0	0	0	0	0	0	0.544	0.544
NFE2L2	STAT1	9606.ENSP00000380252	9606.ENSP00000354394	0	0	0	0	0.123	0.044	0	0.399	0.453
NFE2L2	PTGS2	9606.ENSP00000380252	9606.ENSP00000356438	0	0	0	0	0.109	0	0	0.674	0.698
NFE2L2	TLR4	9606.ENSP00000380252	9606.ENSP00000363089	0	0	0	0	0.094	0	0	0.604	0.626
NFE2L2	PSMB9	9606.ENSP00000380252	9606.ENSP00000363993	0	0	0	0	0.109	0	0.5	0.131	0.579
NFE2L2	PSMB8	9606.ENSP00000380252	9606.ENSP00000364016	0	0	0	0	0.06	0	0.5	0.206	0.594
NFE2L2	PECAM1	9606.ENSP00000380252	9606.ENSP00000457421	0	0	0	0	0.095	0	0	0.445	0.476
NFE2L2	RELA	9606.ENSP00000380252	9606.ENSP00000384273	0	0	0	0	0.105	0.322	0	0.41	0.611
NFE2L2	TNF	9606.ENSP00000380252	9606.ENSP00000398698	0	0	0	0	0.085	0	0	0.687	0.701
NFKBIA	TNFRSF1A	9606.ENSP00000216797	9606.ENSP00000162749	0	0	0	0	0.057	0	0	0.806	0.809
NFKBIA	PECAM1	9606.ENSP00000216797	9606.ENSP00000457421	0	0	0	0	0.133	0.093	0	0.369	0.46
NFKBIA	TNFRSF1B	9606.ENSP00000216797	9606.ENSP00000365435	0	0	0	0	0.143	0	0	0.411	0.473
NFKBIA	PSMB9	9606.ENSP00000216797	9606.ENSP00000363993	0	0	0	0	0.12	0.052	0.4	0.322	0.615
NFKBIA	PSMB8	9606.ENSP00000216797	9606.ENSP00000364016	0	0	0	0	0.128	0.086	0.4	0.31	0.626
NFKBIA	NLRP3	9606.ENSP00000216797	9606.ENSP00000337383	0	0	0	0	0.095	0.093	0	0.581	0.626
NFKBIA	NOS2	9606.ENSP00000216797	9606.ENSP00000327251	0	0	0	0	0	0.073	0	0.629	0.641
NFKBIA	TGFB1	9606.ENSP00000216797	9606.ENSP00000221930	0	0	0	0	0.117	0	0	0.617	0.648
NFKBIA	STAT3	9606.ENSP00000216797	9606.ENSP00000264657	0	0	0	0	0.144	0.045	0	0.708	0.741
NFKBIA	TLR2	9606.ENSP00000216797	9606.ENSP00000260010	0	0	0	0	0.159	0.093	0	0.698	0.749
NFKBIA	PTGS2	9606.ENSP00000216797	9606.ENSP00000356438	0	0	0	0	0.126	0	0	0.842	0.856
NFKBIA	TLR4	9606.ENSP00000216797	9606.ENSP00000363089	0	0	0	0	0.067	0.093	0	0.86	0.872
NFKBIA	STAT1	9606.ENSP00000216797	9606.ENSP00000354394	0	0	0	0	0.115	0.294	0	0.877	0.917
NFKBIA	TNF	9606.ENSP00000216797	9606.ENSP00000398698	0	0	0	0	0.338	0.292	0	0.937	0.967
NFKBIA	RELA	9606.ENSP00000216797	9606.ENSP00000384273	0	0.003	0	0	0.147	0.999	0.9	0.999	0.999
NLRP3	TNFRSF1A	9606.ENSP00000337383	9606.ENSP00000162749	0	0	0	0	0.049	0	0	0.577	0.58
NLRP3	TGFB1	9606.ENSP00000337383	9606.ENSP00000221930	0	0	0	0	0.044	0	0	0.471	0.472
NLRP3	TLR2	9606.ENSP00000337383	9606.ENSP00000260010	0	0	0	0	0.248	0	0	0.808	0.849
NLRP3	STAT3	9606.ENSP00000337383	9606.ENSP00000264657	0	0	0	0	0.047	0.045	0	0.553	0.558
NLRP3	P2RX7	9606.ENSP00000337383	9606.ENSP00000330696	0	0	0	0	0.068	0	0	0.863	0.866
NLRP3	TREM2	9606.ENSP00000337383	9606.ENSP00000362205	0	0	0	0	0.089	0	0	0.373	0.404
NLRP3	P2RX4	9606.ENSP00000337383	9606.ENSP00000353032	0	0	0	0	0.056	0	0	0.418	0.427
NLRP3	PSMB8	9606.ENSP00000337383	9606.ENSP00000364016	0	0	0	0	0.059	0.292	0	0.277	0.476
NLRP3	TNFRSF1B	9606.ENSP00000337383	9606.ENSP00000365435	0	0	0	0	0.148	0	0	0.456	0.517
NLRP3	STAT1	9606.ENSP00000337383	9606.ENSP00000354394	0	0	0	0	0.062	0.045	0	0.517	0.53
NLRP3	PTGS2	9606.ENSP00000337383	9606.ENSP00000356438	0	0	0	0	0.202	0	0	0.648	0.707
NLRP3	TNF	9606.ENSP00000337383	9606.ENSP00000398698	0	0	0	0	0.244	0	0	0.835	0.869
NLRP3	TLR4	9606.ENSP00000337383	9606.ENSP00000363089	0	0	0	0	0.203	0	0	0.849	0.874
NLRP3	RELA	9606.ENSP00000337383	9606.ENSP00000384273	0	0	0	0	0.049	0.099	0.9	0.353	0.937
NOS2	TGFB1	9606.ENSP00000327251	9606.ENSP00000221930	0	0	0	0	0.054	0	0	0.488	0.495
NOS2	SLC11A1	9606.ENSP00000327251	9606.ENSP00000233202	0	0	0	0	0	0	0	0.652	0.652
NOS2	TLR2	9606.ENSP00000327251	9606.ENSP00000260010	0	0	0	0	0	0	0	0.692	0.692
NOS2	STAT3	9606.ENSP00000327251	9606.ENSP00000264657	0	0	0	0	0	0	0.5	0.519	0.749
NOS2	RELA	9606.ENSP00000327251	9606.ENSP00000384273	0	0	0	0	0	0.181	0	0.373	0.464
NOS2	STAT1	9606.ENSP00000327251	9606.ENSP00000354394	0	0	0	0	0	0	0.4	0.581	0.738
NOS2	TLR4	9606.ENSP00000327251	9606.ENSP00000363089	0	0	0	0	0	0	0	0.754	0.754
NOS2	TNF	9606.ENSP00000327251	9606.ENSP00000398698	0	0	0	0	0.042	0	0	0.858	0.858
NOS2	PTGS2	9606.ENSP00000327251	9606.ENSP00000356438	0	0	0	0	0	0.095	0	0.902	0.908
OSMR	STAT3	9606.ENSP00000274276	9606.ENSP00000264657	0	0	0	0	0.122	0	0	0.571	0.607
OSMR	STAT1	9606.ENSP00000274276	9606.ENSP00000354394	0	0	0	0	0.06	0	0	0.394	0.406
P2RX4	P2RX7	9606.ENSP00000353032	9606.ENSP00000330696	0	0	0.076	0.907	0.134	0	0.9	0.946	0.995
P2RX7	TLR2	9606.ENSP00000330696	9606.ENSP00000260010	0	0	0	0	0.072	0	0	0.447	0.464
P2RX7	TNF	9606.ENSP00000330696	9606.ENSP00000398698	0	0	0	0	0.058	0	0	0.683	0.688
P2RX7	TLR4	9606.ENSP00000330696	9606.ENSP00000363089	0	0	0	0	0.06	0	0	0.72	0.725
PECAM1	TNFRSF1A	9606.ENSP00000457421	9606.ENSP00000162749	0	0	0	0	0.086	0	0	0.465	0.49
PECAM1	TGFB1	9606.ENSP00000457421	9606.ENSP00000221930	0	0	0	0	0.11	0	0	0.679	0.702
PECAM1	SPI1	9606.ENSP00000457421	9606.ENSP00000227163	0	0	0	0	0.19	0	0	0.3	0.408
PECAM1	TLR2	9606.ENSP00000457421	9606.ENSP00000260010	0	0	0	0	0.258	0.097	0	0.359	0.533
PECAM1	STAT3	9606.ENSP00000457421	9606.ENSP00000264657	0	0	0	0	0.079	0.091	0	0.583	0.621
PECAM1	STAB1	9606.ENSP00000457421	9606.ENSP00000312946	0	0	0	0	0.221	0	0	0.367	0.486
PECAM1	TGFBR2	9606.ENSP00000457421	9606.ENSP00000351905	0	0	0	0	0.187	0.081	0	0.37	0.488
PECAM1	STAT1	9606.ENSP00000457421	9606.ENSP00000354394	0	0	0	0	0.12	0.091	0	0.364	0.447
PECAM1	PTGS2	9606.ENSP00000457421	9606.ENSP00000356438	0	0	0	0	0.092	0	0	0.487	0.515
PECAM1	TLR4	9606.ENSP00000457421	9606.ENSP00000363089	0	0	0	0	0.225	0.097	0	0.485	0.608
PECAM1	TNF	9606.ENSP00000457421	9606.ENSP00000398698	0	0	0	0	0.129	0	0	0.701	0.728
PECAM1	SLC2A1	9606.ENSP00000457421	9606.ENSP00000416293	0	0	0	0	0	0.091	0	0.485	0.512
PFN1	RRAS	9606.ENSP00000225655	9606.ENSP00000246792	0	0	0	0	0.11	0.093	0	0.424	0.495
PFN1	TLR4	9606.ENSP00000225655	9606.ENSP00000363089	0	0	0	0	0.043	0	0	0.592	0.593
PFN1	TLR2	9606.ENSP00000225655	9606.ENSP00000260010	0	0	0	0	0	0	0	0.648	0.648
PLA2G4A	STAT3	9606.ENSP00000356436	9606.ENSP00000264657	0	0	0	0	0.057	0.187	0	0.568	0.64
PLA2G4A	PLAAT3	9606.ENSP00000356436	9606.ENSP00000320337	0	0	0	0	0	0.045	0.65	0.528	0.828
PLA2G4A	TLR4	9606.ENSP00000356436	9606.ENSP00000363089	0	0	0	0	0.142	0	0	0.371	0.438
PLA2G4A	TNF	9606.ENSP00000356436	9606.ENSP00000398698	0	0	0	0	0	0	0	0.464	0.464
PLA2G4A	PTGS2	9606.ENSP00000356436	9606.ENSP00000356438	0	0	0.363	0	0.214	0	0.65	0.812	0.962
PLAAT3	PTGS2	9606.ENSP00000320337	9606.ENSP00000356438	0	0	0	0	0.051	0	0.65	0.239	0.725
PSMB8	STAT1	9606.ENSP00000364016	9606.ENSP00000354394	0	0	0	0	0.455	0	0.5	0.683	0.906
PSMB8	PSMB9	9606.ENSP00000364016	9606.ENSP00000363993	0	0	0.119	0.757	0.999	0.999	0.72	0.988	0.999
PSMB8	TNFRSF1B	9606.ENSP00000364016	9606.ENSP00000365435	0	0	0	0	0.147	0	0.4	0.144	0.524
PSMB8	RELA	9606.ENSP00000364016	9606.ENSP00000384273	0	0	0	0	0.115	0.076	0.4	0.181	0.544
PSMB8	TNF	9606.ENSP00000364016	9606.ENSP00000398698	0	0	0	0	0.144	0	0.4	0.446	0.69
PSMB9	STAT3	9606.ENSP00000363993	9606.ENSP00000264657	0	0	0	0	0.138	0	0	0.353	0.418
PSMB9	STAT1	9606.ENSP00000363993	9606.ENSP00000354394	0	0	0	0	0.519	0	0	0.804	0.901
PSMB9	TNFRSF1B	9606.ENSP00000363993	9606.ENSP00000365435	0	0	0	0	0.165	0	0.4	0.145	0.535
PSMB9	RELA	9606.ENSP00000363993	9606.ENSP00000384273	0	0	0	0	0.113	0	0.4	0.209	0.542
PSMB9	TNF	9606.ENSP00000363993	9606.ENSP00000398698	0	0	0	0	0.154	0	0.4	0.471	0.708
PTGS2	TNFRSF1A	9606.ENSP00000356438	9606.ENSP00000162749	0	0	0	0	0.062	0	0	0.475	0.486
PTGS2	TGFB1	9606.ENSP00000356438	9606.ENSP00000221930	0	0	0	0	0.084	0	0	0.673	0.688
PTGS2	TLR2	9606.ENSP00000356438	9606.ENSP00000260010	0	0	0	0	0.15	0	0	0.725	0.756
PTGS2	STAT3	9606.ENSP00000356438	9606.ENSP00000264657	0	0	0	0	0.061	0	0.75	0.726	0.93
PTGS2	TGFBR2	9606.ENSP00000356438	9606.ENSP00000351905	0	0	0	0	0.146	0	0	0.35	0.421
PTGS2	STAT1	9606.ENSP00000356438	9606.ENSP00000354394	0	0	0	0	0.084	0	0	0.585	0.604
PTGS2	TH	9606.ENSP00000356438	9606.ENSP00000370571	0	0	0	0	0	0	0	0.413	0.413
PTGS2	SLC2A1	9606.ENSP00000356438	9606.ENSP00000416293	0	0	0	0	0.109	0	0	0.378	0.422
PTGS2	TSPO	9606.ENSP00000356438	9606.ENSP00000379563	0	0	0	0	0.061	0	0	0.41	0.422
PTGS2	TNFRSF1B	9606.ENSP00000356438	9606.ENSP00000365435	0	0	0	0	0.098	0	0	0.557	0.583
PTGS2	RELA	9606.ENSP00000356438	9606.ENSP00000384273	0	0	0	0	0.061	0	0	0.731	0.737
PTGS2	TLR4	9606.ENSP00000356438	9606.ENSP00000363089	0	0	0	0	0.179	0	0	0.751	0.787
PTGS2	TNF	9606.ENSP00000356438	9606.ENSP00000398698	0	0	0	0	0.185	0	0	0.901	0.916
RELA	TNFRSF1A	9606.ENSP00000384273	9606.ENSP00000162749	0	0	0	0	0.115	0	0	0.811	0.826
RELA	TGFB1	9606.ENSP00000384273	9606.ENSP00000221930	0	0	0	0	0.14	0.045	0	0.422	0.484
RELA	SPI1	9606.ENSP00000384273	9606.ENSP00000227163	0	0	0	0	0.06	0	0	0.683	0.689
RELA	TLR2	9606.ENSP00000384273	9606.ENSP00000260010	0	0	0	0	0.088	0.125	0.9	0.521	0.956
RELA	STAT3	9606.ENSP00000384273	9606.ENSP00000264657	0	0	0	0	0.171	0.793	0	0.959	0.992
RELA	STAT1	9606.ENSP00000384273	9606.ENSP00000354394	0	0	0	0	0.118	0.411	0	0.76	0.864
RELA	TLR4	9606.ENSP00000384273	9606.ENSP00000363089	0	0	0	0	0.068	0.125	0.9	0.639	0.966
RELA	TNFRSF1B	9606.ENSP00000384273	9606.ENSP00000365435	0	0	0	0	0.109	0	0	0.37	0.415
RELA	TNF	9606.ENSP00000384273	9606.ENSP00000398698	0	0	0	0	0.118	0.516	0.9	0.944	0.997
SGPL1	STAT3	9606.ENSP00000362298	9606.ENSP00000264657	0	0	0	0	0.063	0	0	0.513	0.524
SLC11A1	SPI1	9606.ENSP00000233202	9606.ENSP00000227163	0	0	0	0	0.259	0	0	0.388	0.528
SLC11A1	TNF	9606.ENSP00000233202	9606.ENSP00000398698	0	0	0	0	0.079	0	0	0.432	0.454
SLC11A1	TLR4	9606.ENSP00000233202	9606.ENSP00000363089	0	0	0	0	0.183	0	0	0.46	0.54
SLC11A1	SP100	9606.ENSP00000233202	9606.ENSP00000343023	0	0	0	0	0.093	0	0	0.513	0.54
SLC11A1	TLR2	9606.ENSP00000233202	9606.ENSP00000260010	0	0	0	0	0.242	0	0	0.609	0.692
SLC18A3	TH	9606.ENSP00000363229	9606.ENSP00000370571	0	0	0	0	0.058	0.087	0	0.77	0.785
SLC2A1	STAT3	9606.ENSP00000416293	9606.ENSP00000264657	0	0	0	0	0.042	0	0	0.488	0.489
SLC2A1	TNF	9606.ENSP00000416293	9606.ENSP00000398698	0	0	0	0	0	0	0	0.816	0.816
SP100	STAT1	9606.ENSP00000343023	9606.ENSP00000354394	0	0	0	0	0.315	0	0.5	0.329	0.75
SPI1	TGFB1	9606.ENSP00000227163	9606.ENSP00000221930	0	0	0	0	0.167	0	0	0.377	0.459
SPI1	STAB1	9606.ENSP00000227163	9606.ENSP00000312946	0	0	0	0	0.32	0	0	0.183	0.421
SPI1	TMEM119	9606.ENSP00000227163	9606.ENSP00000376553	0	0	0	0	0.061	0	0	0.453	0.465
SPI1	TGFBR2	9606.ENSP00000227163	9606.ENSP00000351905	0	0	0	0	0.096	0	0	0.443	0.475
SPI1	STAT3	9606.ENSP00000227163	9606.ENSP00000264657	0	0	0	0	0.081	0	0	0.541	0.56
SPI1	STAT1	9606.ENSP00000227163	9606.ENSP00000354394	0	0	0	0	0.087	0	0	0.571	0.591
SPI1	TLR4	9606.ENSP00000227163	9606.ENSP00000363089	0	0	0	0	0.299	0	0	0.527	0.654
SPI1	TLR2	9606.ENSP00000227163	9606.ENSP00000260010	0	0	0	0	0.274	0	0	0.608	0.703
SPI1	TREM2	9606.ENSP00000227163	9606.ENSP00000362205	0	0	0	0	0.207	0	0	0.679	0.735
SPI1	TNF	9606.ENSP00000227163	9606.ENSP00000398698	0	0	0	0	0.164	0	0	0.718	0.754
STAB1	TREM2	9606.ENSP00000312946	9606.ENSP00000362205	0	0	0	0	0.197	0	0	0.355	0.46
STAT1	TNFRSF1A	9606.ENSP00000354394	9606.ENSP00000162749	0	0	0	0	0.073	0.292	0	0.479	0.628
STAT1	TGFB1	9606.ENSP00000354394	9606.ENSP00000221930	0	0	0	0	0.055	0.171	0	0.585	0.647
STAT1	TLR2	9606.ENSP00000354394	9606.ENSP00000260010	0	0	0	0	0.14	0.045	0	0.642	0.681
STAT1	STAT3	9606.ENSP00000354394	9606.ENSP00000264657	0	0	0.064	0.947	0.192	0.874	0.9	0.982	0.999
STAT1	TGFBR2	9606.ENSP00000354394	9606.ENSP00000351905	0	0	0	0	0.087	0.174	0	0.339	0.459
STAT1	TLR4	9606.ENSP00000354394	9606.ENSP00000363089	0	0	0	0	0.113	0.045	0	0.855	0.867
STAT1	TNF	9606.ENSP00000354394	9606.ENSP00000398698	0	0	0	0	0.121	0	0	0.864	0.875
STAT3	TNFRSF1A	9606.ENSP00000264657	9606.ENSP00000162749	0	0	0	0	0.266	0	0.5	0.571	0.829
STAT3	TGFB1	9606.ENSP00000264657	9606.ENSP00000221930	0	0	0	0	0.063	0.095	0.5	0.729	0.87
STAT3	TLR2	9606.ENSP00000264657	9606.ENSP00000260010	0	0	0	0	0.068	0.045	0	0.644	0.656
STAT3	TGFBR2	9606.ENSP00000264657	9606.ENSP00000351905	0	0	0	0	0.081	0.096	0	0.518	0.565
STAT3	TNFRSF1B	9606.ENSP00000264657	9606.ENSP00000365435	0	0	0	0	0.075	0	0.5	0.393	0.694
STAT3	TLR4	9606.ENSP00000264657	9606.ENSP00000363089	0	0	0	0	0.094	0.045	0	0.837	0.846
STAT3	TNF	9606.ENSP00000264657	9606.ENSP00000398698	0	0	0	0	0.07	0	0.5	0.881	0.939
TGFB1	TNFRSF1A	9606.ENSP00000221930	9606.ENSP00000162749	0	0	0	0	0.147	0	0	0.636	0.677
TGFB1	TNFRSF1B	9606.ENSP00000221930	9606.ENSP00000365435	0	0	0	0	0.135	0	0	0.613	0.651
TGFB1	TLR2	9606.ENSP00000221930	9606.ENSP00000260010	0	0	0	0	0.106	0.134	0	0.615	0.676
TGFB1	TLR4	9606.ENSP00000221930	9606.ENSP00000363089	0	0	0	0	0.073	0.045	0	0.71	0.721
TGFB1	TNF	9606.ENSP00000221930	9606.ENSP00000398698	0	0	0	0	0.125	0	0	0.935	0.941
TGFB1	TGFBR2	9606.ENSP00000221930	9606.ENSP00000351905	0	0	0	0	0.105	0.986	0.9	0.999	0.999
TGFBR2	TLR4	9606.ENSP00000351905	9606.ENSP00000363089	0	0	0	0	0.184	0.1	0	0.305	0.445
TGFBR2	TNFRSF1B	9606.ENSP00000351905	9606.ENSP00000365435	0	0	0	0	0.127	0	0	0.394	0.448
TGFBR2	TNF	9606.ENSP00000351905	9606.ENSP00000398698	0	0	0	0	0.091	0.057	0	0.799	0.813
TH	TLR4	9606.ENSP00000370571	9606.ENSP00000363089	0	0	0	0	0	0	0	0.555	0.555
TH	TNF	9606.ENSP00000370571	9606.ENSP00000398698	0	0	0	0	0	0	0	0.496	0.496
TLR2	TNFRSF1A	9606.ENSP00000260010	9606.ENSP00000162749	0	0	0	0	0.106	0	0	0.727	0.745
TLR2	TMEM119	9606.ENSP00000260010	9606.ENSP00000376553	0	0	0.239	0	0.048	0	0	0.246	0.406
TLR2	TREM2	9606.ENSP00000260010	9606.ENSP00000362205	0	0	0	0	0.126	0	0	0.479	0.525
TLR2	TNFRSF1B	9606.ENSP00000260010	9606.ENSP00000365435	0	0	0	0	0.203	0	0	0.564	0.638
TLR2	TNF	9606.ENSP00000260010	9606.ENSP00000398698	0	0	0	0	0.184	0	0	0.943	0.951
TLR2	TLR4	9606.ENSP00000260010	9606.ENSP00000363089	0	0	0	0.622	0.369	0	0.9	0.989	0.999
TLR4	TNFRSF1A	9606.ENSP00000363089	9606.ENSP00000162749	0	0	0	0	0.256	0	0	0.934	0.949
TLR4	TREM2	9606.ENSP00000363089	9606.ENSP00000362205	0	0	0	0	0.155	0	0	0.73	0.762
TLR4	TNFRSF1B	9606.ENSP00000363089	9606.ENSP00000365435	0	0	0	0	0.182	0	0	0.642	0.694
TLR4	TNF	9606.ENSP00000363089	9606.ENSP00000398698	0	0	0	0	0.125	0	0	0.966	0.969
TMEM119	TREM2	9606.ENSP00000376553	9606.ENSP00000362205	0	0	0	0	0.063	0	0	0.81	0.814
TMEM119	TSPO	9606.ENSP00000376553	9606.ENSP00000379563	0	0	0	0	0.049	0	0	0.424	0.429
TNF	TNFRSF1A	9606.ENSP00000398698	9606.ENSP00000162749	0	0	0	0	0.044	0.999	0.9	0.999	0.999
TNF	TREM2	9606.ENSP00000398698	9606.ENSP00000362205	0	0	0	0	0.062	0	0	0.581	0.59
TNF	TNFRSF1B	9606.ENSP00000398698	9606.ENSP00000365435	0	0	0	0	0.191	0.999	0.9	0.998	0.999
TNF	TSPO	9606.ENSP00000398698	9606.ENSP00000379563	0	0	0	0	0.047	0	0	0.474	0.477
TNFRSF1A	TREM2	9606.ENSP00000162749	9606.ENSP00000362205	0	0	0.232	0	0.044	0	0	0.299	0.44
TNFRSF1A	TSPO	9606.ENSP00000162749	9606.ENSP00000379563	0	0	0	0	0.419	0	0	0.213	0.523
TNFRSF1A	TNFRSF1B	9606.ENSP00000162749	9606.ENSP00000365435	0	0	0	0	0.126	0.292	0.9	0.987	0.999
TREM2	TSPO	9606.ENSP00000362205	9606.ENSP00000379563	0	0	0	0	0.069	0	0	0.568	0.581

## Sheet: Top 10 markers for T cell clust
Extended data table NanoString and Single cell analyses.b
	p_val	avg_log2FC	pct.1	pct.2	p_val_adj	cluster	gene
1	6.47202e-68	1.60838	0.929	0.344	1.23104e-63	0	Tnfrsf4		b Top 10 markers for T cell clusters
2	1.64901e-52	1.35666	0.844	0.303	3.13658e-48	0	Cd4
3	4.0046e-52	1.30619	0.932	0.505	7.61715e-48	0	Bcl2a1d
4	1.60174e-49	1.38567	0.88	0.403	3.04667e-45	0	Cxcr6
5	4.31375e-49	1.29727	0.932	0.53	8.20518e-45	0	Gadd45b
6	1.80145e-45	1.05913	0.961	0.622	3.42654e-41	0	Bcl2a1b
7	1.7009e-41	1.24962	0.912	0.498	3.23527e-37	0	Rbpj
8	4.90659e-40	1.74536	0.474	0.106	9.33283e-36	0	Dusp4
9	6.46408e-40	1.12638	0.844	0.396	1.22953e-35	0	Ehd1
10	3.55415e-39	1.53146	0.549	0.146	6.76035e-35	0	Cd40lg
11	8.89528e-25	1.00212	0.936	0.733	1.69197e-20	1	Ms4a6b
12	2.40842e-20	1.85093	0.495	0.217	4.58105e-16	1	Cd8a
13	2.47179e-17	1.603	0.48	0.224	4.7016e-13	1	Cd8b1
14	7.10496e-16	1.40932	0.678	0.423	1.35143e-11	1	Ly6c2
15	1.49304e-15	1.7761	0.416	0.188	2.83992e-11	1	Gzmk
16	1.30129e-14	1.00149	0.708	0.477	2.47518e-10	1	Gramd3
17	7.46582e-13	1.34832	0.52	0.321	1.42007e-08	1	Gstp3
18	1.0878e-09	1.3329	0.47	0.292	2.06911e-05	1	Slfn1
19	2.75627e-09	2.14976	0.233	0.094	5.2427e-05	1	Ifit1bl1
20	1.93681e-08	1.48364	0.297	0.15	0.0003684	1	Ifi208
21	4.00719e-21	2.85359	0.984	1	7.62208e-17	2	Gm42418
22	9.85236e-19	8.40439	0.086	0.001	1.87402e-14	2	Gata2
23	9.99612e-19	7.68423	0.086	0.001	1.90136e-14	2	Cd200r3
24	2.63531e-16	1.12093	0.891	0.946	5.01263e-12	2	Cd74
25	5.63896e-13	1.45638	0.828	0.944	1.07259e-08	2	Xist
26	6.30608e-12	5.19513	0.117	0.015	1.19948e-07	2	Cyp11a1
27	6.38245e-12	10.0681	0.047	0	1.21401e-07	2	Cpa3
28	1.29533e-11	8.51664	0.086	0.007	2.46385e-07	2	Il6
29	3.62894e-10	6.81021	0.039	0	6.9026e-06	2	Rab44
30	1.40253e-09	1.51978	0.695	0.783	2.66774e-05	2	H2-Aa
31	1.8414e-81	7.02283	0.5	0.024	3.50253e-77	3	Gzmc
32	7.97397e-78	4.4872	0.533	0.034	1.51673e-73	3	2900026A02Rik
33	1.76547e-60	2.6084	0.664	0.09	3.35811e-56	3	Klrb1c
34	1.58625e-58	3.66999	0.533	0.057	3.0172e-54	3	Car2
35	6.60563e-58	4.30169	0.418	0.028	1.25646e-53	3	Emid1
36	3.80825e-57	3.45926	0.566	0.069	7.24366e-53	3	Xcl1
37	1.7517e-53	3.4743	0.467	0.046	3.33191e-49	3	Gas7
38	2.84479e-53	3.69416	0.5	0.057	5.41108e-49	3	Styk1
39	2.12816e-50	3.31413	0.516	0.065	4.04798e-46	3	Cd244
40	3.07678e-48	4.09458	0.393	0.035	5.85234e-44	3	Sema6d
41	3.99179e-49	3.09166	0.698	0.163	7.59278e-45	4	Rasgrp2
42	2.466e-42	3.09628	0.595	0.125	4.69057e-38	4	Klf3
43	1.63055e-38	2.04851	0.888	0.404	3.10147e-34	4	Klf2
44	8.12235e-38	1.74282	0.983	0.873	1.54495e-33	4	Ccl5
45	6.80627e-37	2.38003	0.716	0.224	1.29462e-32	4	Klrg1
46	5.62907e-36	4.34342	0.302	0.027	1.0707e-31	4	S1pr5
47	3.55012e-31	1.28064	0.983	0.854	6.75268e-27	4	Lgals1
48	1.10337e-28	1.13288	0.991	0.885	2.09873e-24	4	Rap1b
49	1.07366e-26	1.48556	0.914	0.569	2.04221e-22	4	Txk
50	7.73556e-26	1.48728	0.888	0.515	1.47138e-21	4	Il18rap
51	3.45646e-52	3.25703	0.865	0.231	6.57453e-48	5	Il2ra
52	5.37888e-46	3.3866	0.552	0.079	1.02312e-41	5	Ltb4r1
53	2.12418e-45	4.2113	0.479	0.056	4.04039e-41	5	Il10
54	6.796e-37	4.29378	0.344	0.032	1.29267e-32	5	Foxp3
55	6.35773e-33	6.13264	0.167	0.003	1.2093e-28	5	9230102O04Rik
56	2.99722e-30	9.48538	0.125	0	5.70101e-26	5	1700061F12Rik
57	7.61404e-30	2.15012	0.833	0.36	1.44827e-25	5	Il7r
58	2.75516e-29	2.4268	0.792	0.368	5.2406e-25	5	Arl5a
59	1.70686e-26	3.1132	0.458	0.099	3.24662e-22	5	Neb
60	3.64198e-26	4.26556	0.219	0.016	6.92741e-22	5	Cysltr1
61	1.72066e-156	3.37156	0.702	0.005	3.27288e-152	6	Cma1
62	2.23187e-106	4.8907	0.821	0.056	4.24524e-102	6	Ncr1
63	5.30937e-91	6.00438	0.548	0.018	1.00989e-86	6	Klra8
64	2.21401e-89	6.21693	0.512	0.014	4.21126e-85	6	Serpinb9b
65	7.74347e-88	3.80172	0.881	0.094	1.47289e-83	6	Klrb1c
66	5.38344e-84	4.67838	0.643	0.04	1.02398e-79	6	Klri2
67	2.14985e-83	3.95473	0.786	0.072	4.08922e-79	6	Eomes
68	2.49733e-83	5.74609	0.5	0.016	4.75016e-79	6	Klra4
69	3.36633e-82	4.24906	0.798	0.082	6.40309e-78	6	Sell
70	1.91509e-74	4.00442	0.702	0.065	3.64269e-70	6	Atp1b1
71	1.22669e-57	3.37768	0.547	0.044	2.33329e-53	7	Ppfia4
72	6.4363e-47	2.868	0.84	0.177	1.22425e-42	7	Trem2
73	1.3325e-46	2.85957	0.853	0.2	2.53455e-42	7	Ly86
74	1.56623e-44	3.07366	0.947	0.314	2.97913e-40	7	Aif1
75	4.88162e-44	3.2193	1	0.511	9.28534e-40	7	C1qc
76	8.06588e-44	2.34043	0.827	0.169	1.53421e-39	7	Marcks
77	1.11147e-42	3.07248	1	0.616	2.11412e-38	7	C1qb
78	2.2235e-42	2.63111	0.693	0.116	4.22933e-38	7	Spi1
79	6.39361e-42	3.27706	1	0.601	1.21613e-37	7	C1qa
80	1.16713e-41	3.42029	0.547	0.069	2.21999e-37	7	Itgb5

## Sheet: Differentially expressed genes 
Extended data table NanoString and Single cell analyses. C
	p_val	avg_log2FC	pct.1	pct.2	p_val_adj
Ms4a4b	1.98349e-29	-2.03357	0.542	0.968	3.7728e-25
Ifng	8.73524e-26	-3.52497	0.188	0.815	1.66153e-21		c Differentially expressed genes between Tregs and T effector cells.
Ostf1	6.14096e-25	-1.63949	0.635	0.945	1.16807e-20
Il2ra	2.95066e-24	2.59803	0.865	0.474	5.61246e-20
Ccl5	1.50894e-22	-2.44217	0.625	0.958	2.87016e-18
Gm8369	2.14815e-22	-2.03224	0.417	0.89	4.08599e-18
Fgl2	9.92553e-22	2.10411	0.865	0.519	1.88793e-17
Nkg7	1.47012e-20	-1.73348	0.448	0.919	2.79632e-16
Serinc3	9.48902e-20	1.36026	0.938	0.851	1.80491e-15
Il7r	1.58345e-19	2.18631	0.833	0.526	3.01188e-15
Bcl2a1d	1.72968e-19	-1.54273	0.594	0.932	3.29003e-15
Sh2d1a	3.88657e-19	-3.07744	0.083	0.649	7.39264e-15
Arap2	5.94279e-19	-1.71093	0.417	0.88	1.13038e-14
Bcl2a1b	2.62297e-18	-1.1567	0.75	0.961	4.98915e-14
Arl5a	3.6753e-18	2.2027	0.792	0.519	6.99078e-14
Ltb4r1	2.27168e-17	2.85452	0.552	0.166	4.32097e-13
Dusp2	6.86183e-17	-1.50523	0.51	0.938	1.30519e-12
Il10	7.62026e-17	4.04525	0.479	0.12	1.44945e-12
Ctsw	3.19479e-16	-1.55054	0.438	0.88	6.07681e-12
Il18rap	1.78788e-15	-2.0803	0.24	0.701	3.40072e-11
Gtf2i	1.97587e-15	-2.58977	0.188	0.649	3.75829e-11
Rgs16	2.02125e-15	-2.77016	0.125	0.607	3.84463e-11
Gapdh	4.89193e-15	-0.756364	0.958	0.994	9.30494e-11
AW112010	2.04989e-14	-0.92776	0.969	1	3.8991e-10
Gdi2	1.27504e-13	-1.10314	0.646	0.919	2.42526e-09
Zfp36l1	2.19654e-13	1.99758	0.865	0.675	4.17803e-09
Dnajc15	2.58325e-13	-1.57376	0.333	0.747	4.91359e-09
Hopx	3.59243e-13	-1.32395	0.448	0.831	6.83316e-09
Cd6	5.35285e-13	-0.918466	0.406	0.873	1.01817e-08
Foxp3	1.22781e-12	3.78282	0.344	0.075	2.33541e-08
Lat	1.24921e-12	-0.933804	0.771	0.964	2.37611e-08
Trbc2	1.39455e-12	-0.904849	0.875	0.987	2.65257e-08
Gramd3	2.11634e-12	-1.75335	0.208	0.649	4.02549e-08
Il12rb2	2.34586e-12	-2.60863	0.083	0.506	4.46206e-08
Samhd1	3.15396e-12	1.52247	0.844	0.714	5.99916e-08
Lsp1	3.66701e-12	-0.835129	0.792	0.961	6.97502e-08
Gm42418	4.3843e-12	0.533336	1	1	8.33938e-08
Ikzf2	6.75715e-12	2.68281	0.562	0.253	1.28528e-07
Samsn1	7.85094e-12	1.0545	0.917	0.906	1.49333e-07
Anxa2	1.3272e-11	-1.17062	0.427	0.847	2.52446e-07
Ly6e	1.79083e-11	0.758498	0.948	0.971	3.40633e-07
Themis	1.98808e-11	-1.29617	0.229	0.679	3.78154e-07
Cd3d	2.09474e-11	-0.753085	0.771	0.99	3.9844e-07
Ybx3	2.31492e-11	-1.73938	0.24	0.633	4.40321e-07
Gata3	2.31492e-11	2.98308	0.646	0.458	4.40322e-07
Itgav	3.14099e-11	1.46899	0.833	0.62	5.97448e-07
Hcst	3.44348e-11	-0.730534	0.844	0.987	6.54984e-07
Ctsd	3.52145e-11	-0.850344	0.771	0.951	6.69815e-07
Cd3g	3.9977e-11	-0.674623	0.823	0.997	7.60403e-07
Ms4a6b	4.36708e-11	-0.904574	0.76	0.938	8.30662e-07
B4galnt1	6.78937e-11	-1.13419	0.458	0.808	1.29141e-06
Ly6c2	6.80292e-11	-2.27688	0.135	0.539	1.29398e-06
Ccr2	8.22435e-11	1.71305	0.76	0.529	1.56435e-06
Gzmk	1.02417e-10	-3.77322	0.031	0.386	1.94808e-06
Il17rb	1.50853e-10	5.87406	0.156	0.006	2.86938e-06
Lck	1.78541e-10	-0.823878	0.688	0.922	3.39603e-06
Car5b	1.95601e-10	-2.82663	0.042	0.403	3.72053e-06
Tesc	2.04156e-10	-1.74742	0.156	0.545	3.88325e-06
9230102O04Rik	2.05587e-10	4.38401	0.167	0.01	3.91046e-06
Cxcr6	2.14712e-10	-0.939326	0.604	0.88	4.08404e-06
Il18r1	2.29198e-10	-1.00677	0.323	0.773	4.35958e-06
Fasl	2.56381e-10	-1.97569	0.125	0.494	4.87662e-06
Oaz1	3.17304e-10	-0.473259	0.927	0.994	6.03543e-06
1700061F12Rik	3.20252e-10	7.73675	0.125	0	6.09151e-06
Eno1	4.04961e-10	-0.78703	0.75	0.955	7.70276e-06
Stat4	4.51006e-10	-1.04871	0.448	0.821	8.57858e-06
Uqcrq	4.9394e-10	-0.734469	0.708	0.932	9.39522e-06
Slamf7	5.50295e-10	-1.98899	0.115	0.484	1.04672e-05
Stat5a	5.85038e-10	-2.15332	0.115	0.484	1.1128e-05
Csf1	7.31078e-10	-1.73301	0.219	0.591	1.39058e-05
Hs3st1	8.72348e-10	6.44455	0.146	0.006	1.65929e-05
Lif	8.82163e-10	4.79495	0.188	0.019	1.67796e-05
Tgfb1	9.53757e-10	-0.952619	0.573	0.867	1.81414e-05
Plcxd2	9.78485e-10	-1.71765	0.135	0.516	1.86118e-05
Gna13	1.08414e-09	0.828787	0.927	0.916	2.06215e-05
Cysltr1	1.40428e-09	3.30887	0.219	0.032	2.67108e-05
Bhlhe40	1.78426e-09	-0.594232	0.896	0.997	3.39384e-05
Calca	1.99107e-09	3.86384	0.271	0.058	3.78722e-05
Rnf19a	2.54345e-09	-1.56254	0.271	0.64	4.83789e-05
Ccndbp1	3.09577e-09	-1.76078	0.115	0.481	5.88845e-05
Cd40lg	3.49547e-09	-1.50112	0.177	0.549	6.64873e-05
Stk26	5.07262e-09	-1.85626	0.135	0.481	9.64862e-05
Jcad	5.62583e-09	4.95868	0.146	0.01	0.000107009
Cst3	6.30687e-09	1.24935	0.875	0.883	0.000119963
Gng2	6.65463e-09	-0.852166	0.583	0.877	0.000126578
Ell2	6.8961e-09	2.10088	0.552	0.315	0.000131171
Serpinb6b	6.98616e-09	-1.62522	0.219	0.568	0.000132884
Chst2	7.73134e-09	-1.62157	0.135	0.487	0.000147058
Sub1	9.92686e-09	-0.486984	0.958	0.994	0.000188819
Abracl	1.12095e-08	-0.692941	0.688	0.906	0.000213216
Eif3h	1.27063e-08	-0.673813	0.802	0.955	0.000241686
Id2	1.47958e-08	-0.532267	0.854	0.971	0.000281431
Gm2682	1.68852e-08	-2.57473	0.062	0.37	0.000321173
Tspan3	2.43286e-08	-1.80626	0.073	0.396	0.000462755
Dgkz	2.51273e-08	-1.21426	0.219	0.594	0.000477947
Sh2d2a	2.56043e-08	-0.656406	0.688	0.912	0.000487019
Zyx	2.57321e-08	-1.10788	0.406	0.734	0.000489451
Cyp11a1	2.62092e-08	6.0812	0.125	0.006	0.000498525
Mast4	2.98969e-08	2.90958	0.198	0.032	0.000568669
Itgb2	3.34954e-08	-0.810521	0.615	0.893	0.000637116
Areg	3.43068e-08	2.4815	0.458	0.198	0.00065255
Ly6a	3.43379e-08	0.673527	0.969	0.997	0.000653142
Bmp7	3.46488e-08	3.52215	0.208	0.039	0.000659055
Fyn	3.46702e-08	-0.845388	0.521	0.844	0.000659463
Klrd1	3.75788e-08	-3.41624	0.073	0.364	0.000714786
S100a4	3.81038e-08	-0.907457	0.677	0.877	0.000724773
Rpl28	3.90221e-08	-0.454324	0.969	0.997	0.00074224
Neb	4.16857e-08	2.4474	0.458	0.231	0.000792904
Slc3a2	4.18208e-08	-0.708105	0.792	0.951	0.000795474
Myl12a	4.65966e-08	-0.549849	0.833	0.971	0.000886315
Stx11	4.90946e-08	-1.54263	0.229	0.542	0.000933829
Nt5e	5.11345e-08	1.78068	0.479	0.247	0.000972629
Cd3e	5.19835e-08	-0.515817	0.781	0.984	0.000988779
Rplp1	5.44421e-08	0.436836	1	1	0.00103554
Lars2	5.50217e-08	0.787499	0.833	0.792	0.00104657
Cd38	5.86768e-08	-1.73147	0.083	0.403	0.00111609
Rpa2	6.19023e-08	-1.54789	0.156	0.494	0.00117744
Slamf1	6.46436e-08	-1.05772	0.302	0.656	0.00122959
Tespa1	6.5153e-08	2.09967	0.417	0.188	0.00123928
Cd52	6.60413e-08	-0.506506	0.99	1	0.00125617
Nfkbia	6.73235e-08	0.949851	0.948	0.981	0.00128056
Jund	6.84749e-08	-0.420954	0.938	0.997	0.00130246
Ece1	6.92088e-08	-1.91816	0.083	0.39	0.00131642
Pparg	7.27547e-08	3.22901	0.198	0.036	0.00138387
Nr3c1	8.20608e-08	1.24854	0.708	0.588	0.00156088
Pde7a	9.59138e-08	-0.857134	0.198	0.545	0.00182438
Il1rl1	1.0422e-07	2.92473	0.479	0.286	0.00198236
Irs2	1.06179e-07	3.04789	0.354	0.14	0.00201963
Epsti1	1.30907e-07	-0.927766	0.458	0.76	0.00248998
Gm13522	1.33817e-07	6.09148	0.135	0.013	0.00254533
Tpi1	1.35679e-07	-0.812693	0.688	0.88	0.00258075
Ffar2	1.35932e-07	5.03693	0.135	0.013	0.00258556
Nr4a2	1.39768e-07	-1.41831	0.219	0.545	0.00265853
Phactr2	1.50861e-07	-1.87687	0.073	0.367	0.00286953
Rac2	1.53364e-07	-0.446112	0.948	0.994	0.00291713
Nmrk1	1.57648e-07	-2.36674	0.083	0.36	0.00299863
Ifitm2	1.61699e-07	-0.852053	0.302	0.636	0.00307568
Zbtb10	1.66478e-07	4.24413	0.125	0.01	0.00316659
Trdv4	1.66478e-07	4.69969	0.125	0.01	0.00316659
Ikzf3	1.68197e-07	1.52936	0.708	0.604	0.00319928
Ptpn13	1.76677e-07	2.45489	0.406	0.192	0.00336058
Myl6	1.80438e-07	-0.451133	0.948	0.997	0.00343211
Itgb7	1.86257e-07	1.00635	0.812	0.734	0.00354279
Mctp2	1.88491e-07	-3.41536	0.021	0.273	0.00358529
Aff4	2.20588e-07	1.69608	0.656	0.526	0.00419581
Fam204a	2.44739e-07	-1.05053	0.25	0.597	0.00465518
Lsm12	2.48632e-07	-0.932911	0.427	0.724	0.00472924
Bcl2l11	2.63404e-07	-1.3118	0.25	0.581	0.00501021
Ttc39c	2.96221e-07	-1.11236	0.354	0.672	0.00563442
Nsmaf	3.18667e-07	-1.1215	0.167	0.494	0.00606136
Actn4	3.24291e-07	-0.937183	0.365	0.721	0.00616834
Chdh	3.24899e-07	5.64289	0.083	0	0.0061799
Tspan5	3.28243e-07	-1.31425	0.104	0.403	0.00624351
Gm19585	3.36261e-07	-1.36133	0.198	0.513	0.00639602
Itgal	3.53473e-07	-0.532771	0.677	0.916	0.00672342
Zmiz1	4.1772e-07	-0.769675	0.385	0.708	0.00794546
Slc2a3	4.21194e-07	-1.26221	0.125	0.445	0.00801154
P2rx7	4.41894e-07	-1.49459	0.167	0.468	0.00840527
Arf3	4.78236e-07	-0.908638	0.229	0.594	0.00909653
Wls	4.79367e-07	2.92285	0.271	0.088	0.00911804
Arl1	4.90153e-07	-1.22271	0.302	0.607	0.00932321
Slfn2	4.98316e-07	-0.721833	0.688	0.903	0.00947846
Grpel1	5.30595e-07	-0.864377	0.26	0.594	0.0100925
Rps15a	5.50812e-07	-0.34989	0.979	1	0.010477
Unc119b	5.73946e-07	-1.43569	0.115	0.416	0.010917
Gpr174	6.36109e-07	-1.03833	0.177	0.503	0.0120994
Serpinb9	7.12034e-07	-1.15411	0.292	0.607	0.0135436
Tbx21	7.27197e-07	-1.0833	0.115	0.419	0.013832
Mak16	7.49513e-07	-1.91019	0.104	0.383	0.0142565
AC147041.1	7.63585e-07	-3.73254	0.01	0.234	0.0145242
Hilpda	7.97974e-07	2.23935	0.688	0.62	0.0151783
Mink1	7.98711e-07	-1.55129	0.125	0.416	0.0151923
2025-09-01	8.11465e-07	-0.504026	0.719	0.922	0.0154349
Psmc5	8.4561e-07	-0.948737	0.323	0.669	0.0160843
Gxylt1	8.50696e-07	-1.00807	0.26	0.584	0.0161811
Uqcc2	9.68409e-07	-0.831442	0.396	0.714	0.0184201
Socs2	9.72597e-07	1.86388	0.583	0.419	0.0184998
Il5	9.7382e-07	3.70167	0.115	0.01	0.018523
Tmem163	9.74746e-07	-1.76087	0.062	0.328	0.0185406
Arpc1b	1.02862e-06	-0.500363	0.865	0.945	0.0195653
Adora2a	1.03213e-06	-0.883438	0.177	0.503	0.0196321
Rapsn	1.04792e-06	3.27736	0.198	0.045	0.0199324
Nampt	1.08164e-06	1.86256	0.521	0.37	0.0205738
Rdx	1.20455e-06	-0.888756	0.438	0.737	0.0229117
Rps8	1.2127e-06	-0.333405	0.99	1	0.0230668
Cd4	1.23346e-06	-0.644049	0.531	0.844	0.0234616
Egln1	1.27606e-06	-0.93362	0.333	0.633	0.0242719
Il13	1.32301e-06	3.63429	0.208	0.052	0.0251649
Itgb1	1.38734e-06	-0.441241	0.417	0.766	0.0263886
Otulin	1.41164e-06	-0.8522	0.406	0.685	0.0268507
Ppp2r3a	1.44894e-06	4.4274	0.146	0.023	0.0275603
Rab1b	1.4795e-06	-0.914726	0.281	0.607	0.0281416
Ifitm10	1.48049e-06	-2.15339	0.031	0.269	0.0281604
Evi2a	1.5024e-06	-1.18986	0.198	0.5	0.0285771
Rbpj	1.53897e-06	-0.724608	0.677	0.912	0.0292728
Gnpda1	1.54024e-06	-1.72609	0.062	0.312	0.0292969
Rgs1	1.55044e-06	-0.42862	0.917	0.977	0.029491
Cd160	1.62155e-06	-2.73913	0.031	0.266	0.0308434
Rasd2	1.63838e-06	-4.74573	0	0.205	0.0311637
Rnf166	1.73622e-06	-0.882239	0.312	0.669	0.0330246
Zbtb16	1.82182e-06	5.84294	0.073	0	0.0346529
Nfkbib	1.85437e-06	-1.1078	0.292	0.584	0.0352719
Ech1	1.88325e-06	-0.897679	0.354	0.679	0.0358213
Trbc1	1.89432e-06	-1.28501	0.469	0.714	0.0360319
Sirt2	1.96869e-06	-0.867474	0.333	0.636	0.0374464
Zfpm1	2.08366e-06	-1.67188	0.135	0.406	0.0396334
Pde4d	2.13757e-06	-0.722582	0.25	0.597	0.0406588
Fam49a	2.24386e-06	-2.25158	0.021	0.244	0.0426804
Lamb3	2.25101e-06	-1.21994	0.135	0.432	0.0428165
Csnk2b	2.27317e-06	-0.670336	0.604	0.86	0.0432379
Prelid1	2.29496e-06	-0.553546	0.667	0.906	0.0436525
4932438H23Rik	2.31728e-06	2.28001	0.302	0.114	0.044077
Setbp1	2.46424e-06	-3.12567	0.01	0.221	0.0468723
Efhd2	2.46936e-06	-0.928039	0.521	0.753	0.0469696
Carnmt1	2.50563e-06	-0.956207	0.188	0.503	0.0476596
Rpl7	2.5337e-06	-0.318803	0.979	0.994	0.0481935
Atp5j	2.61677e-06	-0.638318	0.698	0.916	0.0497736
Srp72	2.62174e-06	-0.778113	0.365	0.685	0.0498681
Nfkb1	2.62745e-06	1.12992	0.865	0.857	0.0499768
Gabarapl2	2.69198e-06	-0.654507	0.635	0.847	0.0512041
Bmpr2	2.73478e-06	2.67886	0.219	0.062	0.0520183
Lmo4	2.80937e-06	4.00757	0.344	0.162	0.053437
Gm5547	2.98567e-06	-1.09513	0.188	0.474	0.0567905
Tpst2	3.16007e-06	-0.783015	0.448	0.721	0.0601077
Brd7	3.18118e-06	-1.07437	0.198	0.477	0.0605092
Npm3	3.35376e-06	-0.978019	0.323	0.61	0.0637918
B9d2	3.39252e-06	-0.987886	0.208	0.497	0.0645291
Casp4	3.49312e-06	-0.960367	0.323	0.63	0.0664426
Rnf152	3.51438e-06	4.84794	0.083	0.003	0.0668469
Akna	3.65096e-06	-0.741392	0.375	0.692	0.0694448
Mkrn1	3.67541e-06	-0.676835	0.542	0.831	0.06991
Imp3	3.77989e-06	-0.999028	0.25	0.562	0.0718972
Junb	3.85011e-06	-0.389065	0.938	1	0.0732329
Gps1	3.8707e-06	-0.648923	0.146	0.435	0.0736247
Zcchc10	3.93774e-06	1.84795	0.469	0.289	0.0748997
Tanc2	3.98771e-06	4.59378	0.104	0.01	0.0758502
Psma5	4.07879e-06	-0.783348	0.417	0.721	0.0775826
Ybx1	4.09677e-06	-0.422017	0.917	0.977	0.0779247
Orai1	4.25233e-06	-0.743618	0.615	0.86	0.0808836
Furin	4.28958e-06	-0.703657	0.625	0.864	0.0815921
Btg1	4.59959e-06	-0.335174	0.99	1	0.0874888
Ifi27	4.63608e-06	-0.649675	0.438	0.76	0.0881829
Adgre5	4.66338e-06	-0.878785	0.438	0.724	0.0887021
Letm1	4.72803e-06	-0.994056	0.146	0.425	0.0899318
Ppig	4.73633e-06	-0.819047	0.406	0.688	0.0900897
Chmp5	4.83504e-06	-0.87659	0.281	0.601	0.0919672
Syt11	4.89787e-06	-0.904955	0.323	0.649	0.0931624
Plxdc2	4.91919e-06	3.369	0.146	0.026	0.093568
Arf5	4.93033e-06	-0.487772	0.875	0.961	0.0937798
Cox5a	5.00689e-06	-0.576707	0.74	0.893	0.095236
Rpl38	5.01284e-06	0.269672	0.979	1	0.0953493
Psma4	5.09001e-06	-0.795853	0.49	0.795	0.0968171
Ola1	5.1525e-06	-1.11624	0.271	0.565	0.0980057
Tspan13	5.29446e-06	1.93767	0.583	0.494	0.100706
Tmem71	5.67922e-06	-1.15382	0.167	0.445	0.108024
Ndufb8	5.72809e-06	-0.665845	0.562	0.841	0.108954
Slc20a1	5.84547e-06	-0.896845	0.167	0.461	0.111187
Itgae	6.04247e-06	3.03583	0.26	0.097	0.114934
Gatad2a	6.05184e-06	-1.06201	0.312	0.571	0.115112
Smpdl3b	6.3193e-06	-2.74961	0.031	0.24	0.120199
Dusp16	6.38318e-06	2.20127	0.354	0.172	0.121414
Casp3	6.43731e-06	-0.950665	0.323	0.604	0.122444
Tcrg-C1	6.76921e-06	3.83976	0.135	0.023	0.128757
Ly75	6.81413e-06	-1.91396	0.052	0.279	0.129612
Rex1bd	6.94831e-06	-0.799543	0.292	0.607	0.132164
Gprin3	7.28993e-06	-1.51706	0.062	0.292	0.138662
Notch1	7.50996e-06	-0.629314	0.25	0.581	0.142847
Susd3	7.55819e-06	-0.928342	0.26	0.558	0.143764
Qars	7.67379e-06	-1.17213	0.146	0.416	0.145963
Rps11	7.79813e-06	-0.265579	0.979	1	0.148328
Dusp6	7.85415e-06	-0.825387	0.198	0.471	0.149394
Ppp3cc	7.90007e-06	-1.05348	0.208	0.497	0.150267
Cd8a	8.29041e-06	-2.86749	0.073	0.289	0.157692
Rpl15	8.50188e-06	-0.333168	0.958	0.994	0.161714
Nudt21	8.76577e-06	-0.884753	0.302	0.61	0.166734
Ddt	9.64332e-06	-1.11635	0.323	0.584	0.183426
Cmip	9.69202e-06	-1.06994	0.281	0.565	0.184352
Rps24	9.72936e-06	0.286989	0.99	1	0.185062
Apol7e	9.83639e-06	-1.81325	0.052	0.269	0.187098
6330403K07Rik	9.97537e-06	-2.05356	0.042	0.256	0.189741
Marcksl1	9.99393e-06	-1.24802	0.073	0.315	0.190095
Tff1	1.01693e-05	-3.49177	0.031	0.231	0.19343
Chn2	1.03725e-05	-1.92613	0.083	0.315	0.197294
Akap13	1.05483e-05	-0.314792	0.948	0.984	0.200639
Psen2	1.06138e-05	1.70904	0.479	0.302	0.201884
Thap12	1.06155e-05	-1.19771	0.167	0.432	0.201917
Vamp8	1.06704e-05	-0.534969	0.635	0.896	0.202962
Txk	1.08311e-05	-1.01498	0.292	0.578	0.206019
Casp1	1.1261e-05	-1.05125	0.198	0.468	0.214196
Tmem2	1.13586e-05	-1.46366	0.073	0.302	0.216051
Snapc5	1.13791e-05	-0.918414	0.208	0.484	0.216441
Il21r	1.14451e-05	-0.741779	0.479	0.76	0.217698
Sumo2	1.1642e-05	-0.471821	0.75	0.948	0.221442
Gars	1.27559e-05	-1.00015	0.219	0.497	0.242629
Cib1	1.27945e-05	-0.952516	0.198	0.477	0.243364
Lxn	1.28632e-05	-1.38914	0.073	0.305	0.24467
Arpc2	1.33348e-05	-0.29578	0.969	0.99	0.253641
Cd48	1.3379e-05	-0.671267	0.521	0.773	0.254482
Cox7b	1.34486e-05	-0.444307	0.729	0.929	0.255806
Rpl24	1.34884e-05	-0.280019	0.99	1	0.256562
Ehd3	1.39584e-05	-1.20479	0.083	0.328	0.265503
Eif3k	1.40471e-05	-0.459515	0.781	0.938	0.267189
Rpl37a	1.41825e-05	0.2717	1	1	0.269765
Lfng	1.42979e-05	-0.78465	0.208	0.51	0.27196
Uqcrfs1	1.49225e-05	-0.591495	0.521	0.786	0.283841
Grina	1.50498e-05	-0.661263	0.438	0.756	0.286262
Capzb	1.59992e-05	-0.409682	0.823	0.955	0.30432
Psmd6	1.62963e-05	-1.21205	0.198	0.455	0.309973
Cyth4	1.64716e-05	-0.742734	0.375	0.669	0.313306
Trat1	1.6902e-05	-1.25143	0.115	0.354	0.321493
Btg2	1.70049e-05	-0.46959	0.615	0.854	0.323451
Zeb2	1.70518e-05	-0.586042	0.448	0.721	0.324343
Nrip1	1.71143e-05	1.92579	0.677	0.627	0.325532
Pxdc1	1.7468e-05	3.71989	0.104	0.013	0.332259
Cnih2	1.76089e-05	-4.51172	0	0.169	0.334938
Yipf4	1.80538e-05	-1.31573	0.188	0.442	0.343401
Cd163l1	1.8274e-05	7.29998	0.073	0.003	0.347589
Cd8b1	1.8304e-05	-2.17551	0.094	0.312	0.34816
Ndufv3	1.94126e-05	-0.455112	0.74	0.906	0.369248
Thoc3	2.01415e-05	-1.04129	0.094	0.334	0.383111
Fam162a	2.0419e-05	-1.14984	0.24	0.513	0.388389
Ifitm3	2.06912e-05	-0.7744	0.573	0.808	0.393567
Rab27b	2.10748e-05	5.80401	0.083	0.006	0.400865
Ttc1	2.12205e-05	-1.05642	0.156	0.412	0.403635
Crlf2	2.13544e-05	-0.625393	0.573	0.808	0.406181
Grn	2.20807e-05	1.11005	0.625	0.503	0.419996
Ppm1h	2.21033e-05	-1.00101	0.219	0.494	0.420428
Nr1d1	2.2231e-05	4.02878	0.094	0.01	0.422856
Napsa	2.24399e-05	-2.00702	0.031	0.224	0.42683
Gm45716	2.26026e-05	-1.05199	0.125	0.38	0.429924
Ahi1	2.3314e-05	-0.774192	0.094	0.338	0.443456
Hes1	2.43443e-05	3.1327	0.094	0.01	0.463052
Rnf138	2.45413e-05	-0.713555	0.365	0.662	0.4668
Stk39	2.47385e-05	-0.785737	0.26	0.571	0.470552
Asap1	2.47652e-05	-1.0269	0.125	0.38	0.471059
Agpat3	2.51932e-05	-0.518997	0.312	0.604	0.4792
Zswim8	2.51938e-05	-0.994345	0.135	0.393	0.47921
Klf5	2.52812e-05	3.54394	0.083	0.006	0.480875
Il21	2.54354e-05	-3.46229	0.021	0.201	0.483807
Atp5g1	2.62866e-05	-0.526836	0.625	0.899	0.499997
Iigp1	2.64637e-05	1.82105	0.51	0.37	0.503367
Slc25a5	2.64681e-05	-0.502428	0.75	0.938	0.503449
Rce1	2.70542e-05	-1.47741	0.062	0.276	0.514598
Nav2	2.74606e-05	2.47285	0.094	0.01	0.522328
Rad54l2	2.74908e-05	-0.546584	0.104	0.36	0.522903
Fas	2.77039e-05	-1.44765	0.177	0.412	0.526956
Mif	2.83169e-05	-0.562602	0.875	0.916	0.538617
Slc28a2	2.97756e-05	-1.55054	0.073	0.292	0.566361
Sulf2	2.99738e-05	-3.1502	0.021	0.198	0.570133
Serpina3f	3.01246e-05	-1.60176	0.198	0.438	0.573001
Bzw2	3.03301e-05	1.92747	0.417	0.244	0.576909
Nab1	3.0821e-05	-0.686511	0.302	0.591	0.586246
Apbb1ip	3.1494e-05	-0.659404	0.344	0.636	0.599048
Tnfsf8	3.18625e-05	-0.274453	0.208	0.5	0.606056
Ndufc1	3.18887e-05	-0.678251	0.427	0.718	0.606554
Sema4a	3.3016e-05	-0.838032	0.24	0.513	0.627998
Spg21	3.38169e-05	-0.627729	0.24	0.513	0.643232
Tcrg-C4	3.40778e-05	4.42597	0.135	0.029	0.648193
Ndufv2	3.4627e-05	-0.821316	0.365	0.662	0.65864
Top2a	3.46644e-05	-0.621444	0.198	0.484	0.659352
Ubb	3.52175e-05	-0.25589	0.979	1	0.669873
Ppp2r2d	3.57533e-05	-0.956242	0.271	0.536	0.680063
Mrps25	3.73649e-05	-1.08964	0.104	0.341	0.710718
Psmb5	3.76412e-05	-0.675149	0.438	0.724	0.715973
Lgals3	3.77744e-05	-0.658776	0.594	0.847	0.718507
Glrx2	3.85587e-05	-0.461342	0.208	0.497	0.733424
Chchd10	3.94841e-05	-0.692033	0.344	0.614	0.751028
Idh3b	4.0053e-05	-0.679241	0.25	0.568	0.761849
Exosc4	4.08176e-05	-0.728329	0.125	0.364	0.776392
Gadd45b	4.09604e-05	-0.363678	0.729	0.932	0.779108
Gm14718	4.1178e-05	-3.45695	0.031	0.208	0.783247
Metap1	4.1411e-05	-1.41579	0.083	0.292	0.787679
Trnt1	4.21513e-05	-1.38805	0.073	0.289	0.80176
Bst2	4.27517e-05	0.842202	0.781	0.763	0.81318
Tuba1a	4.32931e-05	-0.486915	0.406	0.698	0.823478
Trps1	4.33191e-05	-0.577475	0.312	0.604	0.823973
Map4k1	4.39173e-05	-0.565885	0.229	0.513	0.835352
Cox7a2l	4.40833e-05	-0.402516	0.802	0.951	0.838508
Cdk5rap3	4.45852e-05	-1.12399	0.156	0.396	0.848055
Rps17	4.61991e-05	-0.410742	0.854	0.974	0.878753
Nsmce3	4.6597e-05	-1.19165	0.125	0.36	0.886321
Ms4a6d	4.75174e-05	-1.49488	0.083	0.292	0.903828
Sirt7	4.77212e-05	-0.890969	0.26	0.529	0.907705
Map1lc3a	4.78658e-05	-0.618297	0.104	0.344	0.910455
Rap1a	4.79881e-05	-0.549933	0.615	0.812	0.912782
Arsb	4.81736e-05	-0.867609	0.094	0.328	0.91631
Cyth3	4.89152e-05	-1.34561	0.115	0.344	0.930416
H2afy	5.02622e-05	-0.439697	0.698	0.89	0.956038
Litaf	5.03743e-05	-0.792126	0.323	0.607	0.95817
Mtmr1	5.06103e-05	-0.778252	0.104	0.341	0.962658
Zdhhc23	5.12374e-05	3.75575	0.146	0.036	0.974586
Tmem9b	5.1409e-05	-0.707813	0.24	0.506	0.97785
Dctn2	5.22544e-05	-0.80307	0.281	0.552	0.993931
Dynll1	5.33687e-05	-0.574593	0.698	0.89	1
Fbxo32	5.38658e-05	-1.94486	0.052	0.244	1
Thoc7	5.39677e-05	-0.577517	0.427	0.718	1
Oxa1l	5.39926e-05	-0.659088	0.219	0.503	1
Sec22b	5.42374e-05	-0.839975	0.229	0.49	1
Chsy1	5.43078e-05	-1.15963	0.219	0.468	1
Rbm3	5.56087e-05	-0.358084	0.938	0.994	1
Rpl37	5.59687e-05	-0.265233	0.99	1	1
Ndufb4	5.66975e-05	-0.685756	0.448	0.724	1
Fyb	5.71097e-05	-0.42196	0.781	0.932	1
Specc1	5.7419e-05	3.55358	0.104	0.016	1
Gfra4	5.75794e-05	4.37963	0.052	0	1
Slc17a8	5.75794e-05	6.44213	0.052	0	1
Emid1	5.75794e-05	5.02548	0.052	0	1
Psma2	5.90161e-05	-0.478947	0.74	0.909	1
Arpc5	5.94505e-05	-0.456734	0.802	0.935	1
Rps9	6.02895e-05	0.306906	0.99	1	1
Ncald	6.15511e-05	-3.83139	0	0.149	1
Tg	6.15511e-05	-4.06396	0	0.149	1
Hlf	6.19474e-05	2.30993	0.302	0.149	1
Psmf1	6.26992e-05	-1.15874	0.104	0.328	1
Il16	6.33829e-05	-1.01154	0.125	0.364	1
Cox4i1	6.35656e-05	-0.30326	0.969	0.99	1
Arhgdib	6.46288e-05	-0.317	0.906	0.984	1
Nol7	6.53559e-05	-0.457934	0.688	0.89	1
Ddx10	6.68948e-05	-1.2448	0.125	0.347	1
Brms1	6.70754e-05	-1.04197	0.156	0.393	1
Oser1	6.73905e-05	-0.720879	0.219	0.487	1
Timp2	6.81931e-05	-0.616294	0.365	0.669	1
Ifi206	6.84794e-05	-0.932283	0.229	0.506	1
Gm12840	6.89491e-05	-0.863436	0.188	0.429	1
Nudt18	6.90957e-05	-2.40153	0.031	0.205	1
Ccl24	6.9692e-05	3.19524	0.104	0.016	1
Il4	6.97876e-05	5.02343	0.167	0.049	1
Pdcd2l	7.00052e-05	-2.39523	0.031	0.205	1
Nat9	7.03796e-05	-1.51784	0.021	0.192	1
Slc7a8	7.04278e-05	3.44987	0.125	0.026	1
Atp6v1d	7.17098e-05	-0.778209	0.344	0.627	1
Dnajb1	7.33044e-05	-0.786616	0.333	0.591	1
Mcm6	7.3554e-05	-0.507013	0.271	0.549	1
Itgb8	7.38011e-05	5.01039	0.094	0.013	1
Trac	7.44755e-05	-0.398247	0.74	0.981	1
Pdcl3	7.5109e-05	-0.649965	0.281	0.578	1
Zfp91	7.57516e-05	-0.623325	0.5	0.769	1
Atg5	7.58194e-05	-0.953086	0.115	0.351	1
Ap1s1	7.83091e-05	-0.901004	0.146	0.39	1
Mydgf	7.88226e-05	-0.843071	0.219	0.481	1
Ntan1	8.01958e-05	-0.819242	0.344	0.607	1
Abhd8	8.05326e-05	-1.04871	0.208	0.445	1
Higd2a	8.09372e-05	-0.638113	0.448	0.692	1
Arhgap26	8.16033e-05	-0.663262	0.146	0.383	1
Cenpa	8.2856e-05	-0.642889	0.198	0.477	1
Ndfip2	8.30514e-05	-0.850026	0.302	0.558	1
Cd84	8.31616e-05	-0.681275	0.354	0.63	1
P2ry12	8.41634e-05	2.53144	0.125	0.026	1
Frmd4a	8.57735e-05	3.10958	0.094	0.013	1
Zc3hav1	8.6654e-05	1.04118	0.771	0.789	1
Ahdc1	8.67471e-05	-2.14667	0.031	0.205	1
Arpc4	8.80749e-05	-0.423666	0.76	0.912	1
Hdlbp	8.81988e-05	-0.669158	0.271	0.536	1
Cic	8.83271e-05	-0.897903	0.167	0.403	1
Runx2	8.85106e-05	-0.324257	0.417	0.708	1
Pomp	9.06642e-05	-0.469449	0.719	0.89	1
Esm1	9.28224e-05	-3.90914	0	0.143	1
Dusp10	9.50028e-05	1.75072	0.479	0.341	1
Il4ra	9.55318e-05	1.26986	0.521	0.39	1
Mrpl58	9.64039e-05	-0.752665	0.271	0.539	1
Mepce	9.71208e-05	-1.38157	0.094	0.299	1
Dnmbp	9.88349e-05	4.68033	0.083	0.01	1
U2af2	9.91943e-05	-0.595539	0.302	0.568	1
Il1r1	9.9883e-05	4.27486	0.062	0.003	1
Nfyb	0.000100025	-0.693527	0.219	0.471	1
Ubqln2	0.000100893	-1.44107	0.052	0.24	1
Gm5127	0.000101722	4.01359	0.062	0.003	1
Cd226	0.000102063	-0.776299	0.219	0.468	1
Havcr2	0.000103969	-0.847554	0.229	0.464	1
Gm26740	0.000104115	-0.923994	0.146	0.383	1
Kif2a	0.000106429	-1.14173	0.135	0.36	1
Ociad1	0.000106677	-0.708964	0.375	0.636	1
Ino80b	0.000107324	-0.398796	0.312	0.571	1
Dkk3	0.000109403	3.52316	0.062	0.003	1
Atf3	0.00011056	2.46987	0.448	0.318	1
Dnmt3a	0.000110813	-1.31928	0.083	0.282	1
Tob2	0.000112161	1.14311	0.719	0.633	1
Rpl10	0.000112222	-0.327307	0.969	0.994	1
Rilpl2	0.000112312	-0.506747	0.365	0.653	1
Stap1	0.000112594	-0.521118	0.156	0.399	1
St13	0.000114162	-0.532164	0.51	0.769	1
Paxbp1	0.000114686	1.43883	0.573	0.474	1
Exosc3	0.000114952	-0.775054	0.167	0.409	1
Ubash3a	0.000116245	-0.553299	0.198	0.448	1
Coro1a	0.000117143	-0.291285	0.927	0.994	1
Chst11	0.000118466	-0.990319	0.177	0.399	1
Jup	0.000119461	2.95468	0.073	0.006	1
Mfsd6	0.000120596	-1.12344	0.177	0.409	1
Slbp	0.000120762	-0.583943	0.406	0.698	1
Galc	0.000121349	2.47629	0.26	0.114	1
Itga4	0.000122177	-0.412562	0.469	0.799	1
Cd86	0.00012599	-1.51328	0.104	0.308	1
Arntl	0.000126445	-0.873689	0.062	0.256	1
Mrpl20	0.000127549	-0.744382	0.406	0.649	1
Zfp598	0.000128698	-1.82331	0.052	0.234	1
St3gal4	0.0001288	-0.965906	0.135	0.357	1
Ube2m	0.000129232	-0.465972	0.521	0.76	1
Kdm2b	0.00013095	-0.635565	0.479	0.74	1
Dctn3	0.000131648	-0.58483	0.51	0.744	1
Stat5b	0.000132458	-0.555358	0.208	0.464	1
Isyna1	0.000132475	-0.596891	0.094	0.315	1
Ccdc184	0.000134064	4.23463	0.125	0.029	1
Fabp5	0.000134218	1.13623	0.708	0.662	1
Tmem176a	0.000135477	2.85775	0.25	0.107	1
Synrg	0.00013608	-0.530039	0.156	0.419	1
Cers6	0.000137594	-3.30759	0.01	0.156	1
Cbx4	0.00013902	-0.780338	0.312	0.552	1
Banf1	0.000139058	-0.60797	0.312	0.597	1
Dclk1	0.000139561	-3.90326	0	0.136	1
1810041H14Rik	0.000140573	-3.02779	0.01	0.156	1
Vps13a	0.000141968	-0.862902	0.24	0.468	1
Snapin	0.000145394	-0.656914	0.104	0.321	1
Rbm47	0.000146115	-1.38129	0.094	0.295	1
Tmem176b	0.000149072	2.61862	0.302	0.159	1
Sh3kbp1	0.000150173	-0.44842	0.51	0.805	1
Otub1	0.000151879	-0.481574	0.177	0.438	1
Pgk1	0.00015268	-0.39523	0.76	0.961	1
Wnk1	0.000154488	0.661199	0.938	0.948	1
Upf3b	0.00015467	-0.336368	0.198	0.455	1
Pkm	0.000156307	-0.347172	0.854	0.968	1
Rnf7	0.000156411	-0.644667	0.354	0.633	1
Frg1	0.000157807	-0.283914	0.333	0.63	1
Ubac2	0.000157972	-0.632525	0.292	0.565	1
Trp53	0.000158107	-0.300371	0.208	0.455	1
Commd4	0.000159481	-0.473781	0.302	0.584	1
Tgfbr2	0.000163203	-0.535606	0.417	0.695	1
Kctd12	0.000167479	1.8667	0.417	0.269	1
Ccdc174	0.000169337	-0.569337	0.344	0.63	1
Papola	0.000169397	-0.579125	0.344	0.614	1
Atp6v1f	0.000170272	-0.446258	0.708	0.929	1
Mrpl18	0.000170372	-0.765076	0.354	0.617	1
Mrpl52	0.000171442	-0.406253	0.719	0.929	1
Atp5h	0.000171586	-0.335413	0.896	0.977	1
Usp48	0.000171953	-0.607446	0.188	0.429	1
Rps6ka5	0.000171994	2.44061	0.156	0.045	1
Ms4a4c	0.000172024	-0.839185	0.167	0.396	1
Gtf2a2	0.000172125	-0.614474	0.271	0.529	1
Slc38a1	0.000172325	0.963446	0.76	0.718	1
Btg3	0.000172365	-0.675854	0.219	0.471	1
Rara	0.000174418	1.80154	0.406	0.26	1
Dtx3	0.00017451	-0.603731	0.135	0.364	1
Znhit2	0.000176898	-1.65922	0.052	0.227	1
Mmadhc	0.000177736	-1.0474	0.167	0.383	1
Nsdhl	0.000178513	-1.61384	0.042	0.211	1
Gpr171	0.000180245	-0.453303	0.292	0.552	1
Gbp2	0.000180438	0.875519	0.667	0.62	1
Tlr1	0.000181574	2.93771	0.135	0.036	1
Malsu1	0.000182353	-0.978556	0.135	0.351	1
Ermn	0.000183222	-0.7291	0.135	0.364	1
Dnajc19	0.000185414	-0.791585	0.292	0.549	1
Vamp2	0.000185845	-0.761805	0.271	0.526	1
Dync1li2	0.000187251	-2.31709	0.021	0.172	1
Lgmn	0.000188155	1.50965	0.458	0.315	1
Sigirr	0.000189124	-0.566521	0.135	0.367	1
Sugt1	0.000190278	-0.640612	0.469	0.727	1
1110008P14Rik	0.000194454	-0.550875	0.406	0.679	1
Ndufa1	0.000196976	-0.433414	0.635	0.896	1
Timm10b	0.000197552	-0.480003	0.354	0.646	1
S1pr4	0.000200482	-1.02491	0.188	0.406	1
Smco4	0.000200673	1.81995	0.438	0.305	1
Acbd5	0.000201637	-0.870736	0.271	0.503	1
Eif4g3	0.000202941	-0.30906	0.312	0.604	1
Trib2	0.000203489	-1.01496	0.083	0.279	1
Cacybp	0.000204218	-0.819747	0.281	0.545	1
Bub3	0.000204725	-0.53664	0.344	0.64	1
Strn4	0.000205116	-0.843571	0.135	0.351	1
Dgkh	0.000207535	-0.890694	0.115	0.325	1
Vezf1	0.000212669	-0.599988	0.198	0.448	1
Hif1a	0.00021276	-0.29328	0.927	1	1
Mad2l1bp	0.000213022	-0.979453	0.104	0.308	1
4833439L19Rik	0.000213281	-0.804923	0.156	0.37	1
Cd96	0.00021415	-0.894743	0.26	0.503	1
Golm1	0.000214332	-1.24267	0.104	0.305	1
Prmt1	0.000214463	-0.638246	0.302	0.552	1
Fbxw7	0.000214645	-0.94349	0.083	0.279	1
Uqcrh	0.000215222	-0.332665	0.927	0.974	1
Nrgn	0.000216144	-3.45734	0.031	0.185	1
Arl3	0.000216646	-1.23518	0.115	0.315	1
Ensa	0.000217458	-0.675402	0.281	0.523	1
Acd	0.000219254	-0.939631	0.073	0.263	1
Zfp142	0.00021989	-1.07602	0.062	0.247	1
Txnrd1	0.000220426	-0.696506	0.302	0.558	1
Tigd2	0.000224472	-0.922508	0.146	0.36	1
Slc25a51	0.000225027	1.43614	0.448	0.325	1
Atg4d	0.000226955	-0.590112	0.125	0.344	1
Hmgb2	0.000227307	-0.452555	0.854	0.981	1
Atp6v1c1	0.000228015	-0.957294	0.135	0.354	1
Efr3a	0.000230939	-0.634817	0.167	0.416	1
Cd5	0.000234821	-0.461443	0.458	0.698	1
Mrpl36	0.000237647	-0.665022	0.208	0.464	1
St8sia1	0.000238409	-3.01167	0.031	0.182	1
Ankra2	0.000240027	-0.681173	0.125	0.341	1
Psmb3	0.000240548	-0.438093	0.698	0.886	1
Hdgfl2	0.000243759	-0.565794	0.094	0.286	1
Ppp2cb	0.000246598	-0.726964	0.125	0.344	1
Ndfip1	0.000247888	-0.40612	0.583	0.841	1
Nf1	0.000252125	-0.630569	0.062	0.247	1
Ptprs	0.000253641	-1.37358	0.062	0.237	1
Ppp4r2	0.000254433	-0.328643	0.26	0.536	1
Zmat5	0.000254539	-0.608116	0.219	0.471	1
Mrps16	0.000255374	-0.44931	0.479	0.756	1
Olfr60	0.000255916	-3.58264	0	0.127	1
Snrpb	0.000262864	-0.407197	0.656	0.906	1
Mfge8	0.000264219	2.30262	0.135	0.036	1
Arhgap30	0.000264847	-0.469032	0.521	0.779	1
Abca2	0.000265464	-1.10158	0.146	0.354	1
Gm2a	0.000271575	1.09353	0.604	0.562	1
Supt4a	0.000272541	-0.482011	0.698	0.86	1
Gm5914	0.000272769	-1.22887	0.083	0.273	1
Hnrnph3	0.000275424	-1.13554	0.167	0.386	1
Larp7	0.000275953	-0.625379	0.229	0.468	1
Klrc1	0.0002803	-2.59626	0.042	0.195	1
Emsy	0.000285747	-0.568609	0.281	0.519	1
Pnp	0.000287491	-0.558162	0.208	0.448	1
Rplp0	0.000287541	-0.251638	0.979	1	1
Aqr	0.000287772	-0.359402	0.208	0.455	1
Atad2	0.000288113	-0.377269	0.396	0.666	1
Phf13	0.000293113	-1.2872	0.021	0.169	1
Tma7	0.000294254	-0.337115	0.812	0.971	1
Eif4enif1	0.000295289	-0.741791	0.156	0.377	1
Pcsk7	0.000298688	-0.807641	0.177	0.399	1
Mettl7a1	0.000299743	-1.30064	0.073	0.253	1
Pip4k2a	0.000299945	-0.547467	0.229	0.471	1
Itfg1	0.000302584	-1.33629	0.062	0.24	1
Ctla2a	0.000302823	1.21356	0.812	0.838	1
Fam96a	0.000306626	-0.736507	0.365	0.617	1
Acp1	0.0003083	-0.47989	0.292	0.545	1
Insig1	0.000309519	-1.04301	0.156	0.367	1
Sla2	0.000312539	-0.790853	0.135	0.347	1
Lig1	0.000315754	1.69619	0.469	0.357	1
Ppp1ca	0.000315997	-0.330287	0.823	0.945	1
Gem	0.000317223	-0.320822	0.333	0.633	1
Bola3	0.000320239	-0.62392	0.323	0.558	1
Tgfbr3	0.000323928	-1.51331	0.052	0.218	1
Clk4	0.000324036	-0.628048	0.365	0.63	1
Adam33	0.000327145	4.93211	0.042	0	1
Blk	0.000327145	6.2591	0.042	0	1
Igsf5	0.000327145	4.90784	0.042	0	1
Polr2k	0.000327207	-0.53129	0.438	0.698	1
Bax	0.000329448	-0.439375	0.5	0.76	1
Ddx39	0.00033107	-0.945651	0.208	0.419	1
Fmc1	0.000331533	-0.906066	0.167	0.38	1
Rpap2	0.000333743	-1.77953	0.042	0.198	1
Ppm1d	0.000336432	-1.36958	0.094	0.279	1
Ypel2	0.000340231	4.34073	0.083	0.013	1
Commd3	0.000341078	-0.603551	0.25	0.503	1
Kmt5a	0.000342902	-0.854793	0.26	0.484	1
Lyar	0.000344193	-0.721436	0.167	0.399	1
Pom121	0.000345154	-1.11196	0.135	0.334	1
Stk32c	0.000347629	-1.06443	0.083	0.269	1
Lysmd2	0.000354009	-1.2358	0.073	0.25	1
Rgs3	0.000354702	-0.764638	0.135	0.341	1
Trappc6b	0.000360234	-0.684631	0.281	0.51	1
Rpl29	0.000361485	-0.272566	0.958	0.997	1
Jdp2	0.00036186	1.91421	0.26	0.123	1
Tmed4	0.000365886	-1.0174	0.073	0.253	1
Uxt	0.000367189	-1.03671	0.094	0.279	1
Fes	0.000370002	-0.664008	0.146	0.364	1
Psmd12	0.000379731	-0.391137	0.281	0.539	1
1600012H06Rik	0.000382094	-3.45237	0	0.12	1
Ctdspl2	0.000383179	-0.866868	0.156	0.367	1
Rnf128	0.000385171	3.8254	0.167	0.058	1
Phip	0.000388426	-0.526301	0.25	0.487	1
Nckap5	0.000389837	4.10557	0.104	0.023	1
Pgam1	0.000392491	-0.567839	0.521	0.756	1
Pnkp	0.000397031	-0.639864	0.156	0.373	1
Eif2b2	0.000397357	-0.813929	0.156	0.37	1
Tnfrsf13b	0.000399659	2.31786	0.208	0.084	1
Tubb4b	0.000401924	-0.579738	0.385	0.633	1
Ppwd1	0.000405561	-0.711584	0.24	0.464	1
Phykpl	0.000411149	-1.38689	0.042	0.198	1
Bcl2l1	0.000411539	-0.47942	0.365	0.633	1
Hif1an	0.000411988	-1.01487	0.135	0.331	1
Eif3f	0.000415867	-0.321883	0.875	0.984	1
Hacd2	0.000425608	-1.42715	0.062	0.231	1
Cdkn2aip	0.000429262	-0.573482	0.229	0.464	1
Cops6	0.00042967	-0.731003	0.385	0.636	1
Mrpl9	0.000431622	-0.919	0.208	0.429	1
Cct8	0.000437576	-0.562423	0.427	0.708	1
Cstb	0.000442778	-0.472227	0.542	0.815	1
Dopey2	0.000444668	-0.917951	0.146	0.357	1
Itgb1bp1	0.000444746	-0.637402	0.208	0.445	1
Hdc	0.000447162	4.46278	0.135	0.039	1
Gpm6b	0.000449771	-2.63984	0.042	0.188	1
Ufd1	0.000450725	-0.650153	0.208	0.429	1
Smdt1	0.000450926	-0.511381	0.615	0.854	1
Bcl10	0.000454019	-0.561024	0.354	0.633	1
Psmd14	0.00045435	-0.632577	0.333	0.591	1
Frmd4b	0.000464214	1.59409	0.458	0.341	1
Ccr9	0.000465258	3.99236	0.073	0.01	1
Polr2b	0.000467345	-1.36398	0.094	0.269	1
Acer2	0.000471792	3.54612	0.073	0.01	1
Nedd4l	0.000471792	3.81657	0.073	0.01	1
Rbm8a	0.000473818	-0.481387	0.615	0.808	1
Dennd2d	0.000473818	-1.33959	0.062	0.227	1
Isca1	0.000483066	-0.637482	0.26	0.51	1
Cox6c	0.000484398	-0.283241	0.906	0.977	1
Gimap4	0.000486532	-0.258979	0.677	0.929	1
Sertad1	0.0004874	-0.506373	0.354	0.62	1
Map3k5	0.000490125	-1.08367	0.073	0.25	1
Secisbp2l	0.00049105	-0.803049	0.104	0.295	1
1500011K16Rik	0.000491777	-0.949965	0.135	0.338	1
Ptprc	0.000491798	-0.299444	0.917	0.984	1
Eif2b5	0.000492383	-0.807593	0.073	0.253	1
Phax	0.000493807	-0.450931	0.24	0.51	1
Higd1a	0.000500662	-0.58979	0.594	0.789	1
Serbp1	0.000502016	-0.349118	0.927	0.981	1
Arid2	0.000511071	-1.69471	0.062	0.221	1
Gna15	0.000513355	-0.575985	0.302	0.558	1
Tbcb	0.000515032	-0.446983	0.396	0.662	1
Nucb2	0.000517341	2.13634	0.156	0.052	1
Chmp1b	0.000517473	-0.466507	0.302	0.555	1
Cfap36	0.00051973	-0.679204	0.146	0.357	1
Hip1	0.000521046	-0.555181	0.229	0.464	1
Cap1	0.000523233	-0.442795	0.49	0.731	1
Ier5l	0.000528037	-0.559558	0.188	0.393	1
Pced1b	0.000529923	-0.751109	0.083	0.263	1
Cdc42se2	0.000540832	-0.284307	0.406	0.685	1
Mmp25	0.000541758	4.24316	0.052	0.003	1
Hormad2	0.000551449	3.87498	0.052	0.003	1
Zyg11b	0.000552808	-0.79201	0.24	0.451	1
Rwdd1	0.000552918	-0.317614	0.635	0.821	1
Tmtc2	0.000553766	3.82968	0.062	0.006	1
Ctdnep1	0.00055444	-0.312108	0.302	0.575	1
Thy1	0.000554758	-0.424492	0.74	0.938	1
Rela	0.000555545	1.1755	0.562	0.455	1
Ubl5	0.000557893	-0.313902	0.854	0.981	1
Klf13	0.00056675	-0.367628	0.583	0.86	1
Paox	0.000569024	-3.21462	0	0.114	1
Cops5	0.000571178	-0.635743	0.292	0.516	1
Fbxl14	0.000578921	-0.839156	0.188	0.393	1
Ttc7	0.000579598	-0.878006	0.188	0.383	1
Apbb2	0.000579871	3.54078	0.062	0.006	1
C2	0.000579871	3.31203	0.062	0.006	1
Dst	0.000583126	2.03305	0.292	0.156	1
Ly6c1	0.000584055	2.99419	0.146	0.045	1
Cyba	0.000584258	-0.290442	0.896	0.964	1
Sap18	0.000584975	-0.439482	0.604	0.834	1
Pde7b	0.000588824	3.01555	0.062	0.006	1
Ext1	0.000592955	-1.35491	0.062	0.221	1
Ckb	0.000593087	-0.595524	0.25	0.487	1
Edf1	0.000594254	-0.422074	0.698	0.883	1
Ncoa3	0.000594446	1.40198	0.448	0.328	1
Mthfs	0.000603849	-0.668816	0.115	0.318	1
Mea1	0.000603878	-0.521461	0.24	0.487	1
Dr1	0.000605389	-1.07738	0.177	0.37	1
Plekho1	0.000606547	-1.51839	0.083	0.25	1
Pold4	0.000609046	-0.614097	0.448	0.695	1
Nrros	0.000610582	2.01126	0.281	0.149	1
Ifit1bl1	0.000612501	-1.64738	0.042	0.188	1
Mtch2	0.000614454	-0.682627	0.229	0.451	1
Atp5j2	0.000617246	-0.318246	0.865	0.964	1
Sdc4	0.000617302	2.00784	0.219	0.097	1
Tsr3	0.000621044	-1.37355	0.094	0.263	1
Serpina3g	0.000627463	-0.550781	0.51	0.718	1
Stag2	0.000628602	-0.601936	0.333	0.571	1
Taf10	0.000634253	-0.388986	0.552	0.828	1
Gm47283	0.000634745	1.24526	0.698	0.64	1
Gsap	0.000637287	-0.480647	0.052	0.211	1
Iqgap1	0.000640785	-0.421672	0.792	0.912	1
Lyst	0.000641597	-1.05883	0.135	0.325	1
Cd7	0.00064301	-1.79466	0.031	0.172	1
Scaf8	0.000648245	-0.937033	0.188	0.393	1
Golga2	0.000649779	-0.930316	0.188	0.39	1
Uggt1	0.000650982	-0.540031	0.156	0.38	1
Wbp4	0.000651693	-0.540939	0.333	0.555	1
Sf3a3	0.000653254	-0.92789	0.156	0.354	1
Chd7	0.00065455	-0.50217	0.427	0.662	1
Acbd4	0.000660512	-2.40698	0.01	0.133	1
Ccng2	0.000661298	-1.10608	0.115	0.302	1
Scyl2	0.000668329	-0.577945	0.125	0.318	1
Tbcel	0.000670008	-0.78582	0.052	0.211	1
Tsg101	0.000670294	-0.295297	0.208	0.445	1
Pfn1	0.000672528	-0.259368	0.969	0.997	1
Pim1	0.000673592	0.717046	0.958	0.968	1
Src	0.000682044	2.52358	0.156	0.055	1
Gpr18	0.000683725	-0.658248	0.156	0.373	1
Traf5	0.0006903	-1.25335	0.052	0.208	1
Aldoa	0.000691153	-0.322941	0.917	0.99	1
Myo1f	0.000692717	-0.464374	0.198	0.429	1
Cdkn2a	0.00069804	-1.95177	0.01	0.133	1
Rab11fip4	0.000702975	-0.668818	0.167	0.377	1
Tmc6	0.000703602	-0.726769	0.177	0.383	1
Eloc	0.000703935	-0.572315	0.49	0.692	1
Cox5b	0.000704941	-0.3938	0.844	0.955	1
Plk2	0.000714979	-1.6285	0.094	0.263	1
Map7d1	0.000723253	-0.855486	0.104	0.286	1
Tmem50a	0.000728269	-0.31999	0.812	0.942	1
Itga1	0.000731143	-1.42971	0.062	0.218	1
Frat2	0.000733046	-0.678111	0.073	0.247	1
Gltp	0.000736481	-0.643508	0.333	0.584	1
Etfrf1	0.000739159	-1.00613	0.021	0.153	1
Prkca	0.000739935	-0.716967	0.302	0.532	1
Atp2b1	0.000747005	0.905218	0.781	0.737	1
Trip4	0.00075213	-1.20042	0.083	0.253	1
Hist1h1e	0.000753137	-0.516477	0.135	0.344	1
Bnip3l	0.000755058	-0.388247	0.573	0.828	1
Washc5	0.000755625	-0.842146	0.042	0.188	1
Ighm	0.000761653	2.36057	0.24	0.117	1
Pou2f2	0.000770426	-1.19598	0.083	0.256	1
Srp19	0.000773202	-0.408428	0.458	0.695	1
Snapc1	0.000778427	-0.422858	0.198	0.425	1
Cenpx	0.000783134	-0.74308	0.333	0.552	1
Emp1	0.00079306	-0.338489	0.125	0.328	1
Eif2d	0.000794618	-1.09775	0.052	0.205	1
Cisd3	0.000799128	-0.689433	0.167	0.367	1
Phf20l1	0.000809483	-0.27937	0.385	0.646	1
Atp5d	0.000810611	-0.325814	0.781	0.925	1
Commd8	0.000813097	-0.430632	0.25	0.481	1
Tmem110	0.000818079	-1.23942	0.052	0.201	1
Rnase4	0.000819654	1.92604	0.271	0.14	1
Anapc11	0.000820153	-0.465273	0.24	0.474	1
Zap70	0.000820469	-0.312187	0.635	0.828	1
Ssbp4	0.000822956	-0.311916	0.427	0.701	1
Znrf1	0.00083166	1.34725	0.521	0.445	1
Chmp6	0.000843918	-0.928813	0.094	0.269	1
Thap2	0.000845105	-1.03941	0.073	0.237	1
Ica1	0.000845364	-3.12056	0	0.107	1
Sema4d	0.000845987	0.765577	0.688	0.672	1
Ddit3	0.000849582	-0.872271	0.167	0.364	1
Ncbp2	0.000855942	-0.781018	0.115	0.299	1
Coa3	0.00085674	-0.534744	0.271	0.506	1
Timm17b	0.000857104	-0.795786	0.219	0.432	1
Gm26917	0.000857118	1.01181	0.708	0.711	1
Dcp1b	0.000860089	-1.4635	0.052	0.201	1
Mettl26	0.00086596	-0.992751	0.156	0.344	1
Slu7	0.000871123	-0.677571	0.24	0.474	1
Nlk	0.000872512	-0.687296	0.125	0.308	1
Basp1	0.000883554	1.92187	0.302	0.179	1
Tmem222	0.000893603	-0.684391	0.177	0.37	1
Papss1	0.000897491	-1.05244	0.031	0.169	1
Gm17767	0.000901278	3.35062	0.104	0.026	1
Zfp36	0.000905185	1.03241	0.688	0.672	1
Plxnd1	0.000907928	2.38746	0.156	0.055	1
Gm42047	0.000911978	-1.24166	0.021	0.146	1
Stim2	0.000915324	-0.835048	0.146	0.344	1
Ifi214	0.000918129	-0.614639	0.156	0.357	1
Ezh1	0.000919861	-0.873152	0.115	0.302	1
Wrnip1	0.000920993	-0.646927	0.104	0.289	1
1500011B03Rik	0.000923831	-1.92799	0.031	0.162	1
Col18a1	0.000926061	3.32503	0.083	0.016	1
Fam83g	0.000928778	3.28008	0.104	0.026	1
Ptbp2	0.000932049	-0.518288	0.208	0.445	1
Lsm1	0.000934256	-0.610323	0.188	0.406	1
Pip5k1a	0.000937456	-0.297179	0.229	0.458	1
Ube2s	0.000939033	-0.294823	0.635	0.89	1
Gpatch11	0.000955204	-0.724707	0.104	0.286	1
Ift20	0.000958056	-0.498712	0.406	0.659	1
Pacsin1	0.000958829	-2.00459	0.083	0.234	1
Dennd1c	0.000959837	-0.40519	0.188	0.419	1
Tcof1	0.000967669	-0.548863	0.281	0.523	1
Srsf10	0.000970245	-0.432774	0.406	0.672	1
Jmjd6	0.00097367	-0.722975	0.135	0.334	1
Cks2	0.000974913	-0.535362	0.354	0.568	1
Psmc6	0.000975577	-0.515781	0.365	0.623	1
Zer1	0.000978204	-0.721935	0.115	0.305	1
Pik3cd	0.000981733	-0.511277	0.365	0.588	1
Zmat2	0.00098379	-0.300607	0.365	0.604	1
Ralgps2	0.000989683	-0.846555	0.083	0.247	1
Prf1	0.00100013	-1.58799	0.052	0.198	1
Mxd4	0.001002	-0.609098	0.417	0.643	1
Rit1	0.00100338	-0.643	0.052	0.208	1
Zfp672	0.00100912	-1.02959	0.135	0.315	1
Dhps	0.00100958	-0.550636	0.292	0.51	1
Hspa4l	0.00101268	-0.449647	0.115	0.299	1
Ctnnbip1	0.00102354	-0.939743	0.042	0.185	1
Wipf1	0.00104003	-0.527468	0.542	0.744	1
Zfp646	0.00104567	-0.862541	0.094	0.263	1
Aimp1	0.00105132	-0.472508	0.5	0.756	1
Gtf2f2	0.00105229	-0.507129	0.125	0.315	1
2310039H08Rik	0.00105363	-0.945638	0.146	0.328	1
Slc7a6os	0.00105525	-0.716735	0.156	0.357	1
Kctd17	0.00105772	-1.42736	0.083	0.24	1
Snrnp27	0.00106558	-0.629439	0.438	0.659	1
Chd9	0.00106754	-0.712449	0.229	0.438	1
Exoc6	0.00106844	-1.18187	0.083	0.24	1
Snhg12	0.00106925	-0.626043	0.312	0.529	1
Gzmb	0.00107443	1.6972	0.521	0.435	1
Samd10	0.001076	-2.37656	0.021	0.143	1
Diaph1	0.00107806	-0.305274	0.604	0.838	1
Ctsa	0.00108649	-0.641063	0.448	0.662	1
Cd82	0.00109183	-0.422518	0.75	0.89	1
Vps4a	0.00109988	-0.960135	0.104	0.276	1
Rai14	0.00110014	-2.14605	0.031	0.159	1
Kcnk7	0.00110135	-1.63097	0.031	0.162	1
Myo1e	0.00110181	2.1887	0.26	0.136	1
Zbtb2	0.00111435	-1.45623	0.031	0.166	1
Zfyve27	0.00111581	-0.917248	0.083	0.247	1
Ero1l	0.0011216	2.00678	0.469	0.393	1
Klk8	0.00112227	0.75233	0.573	0.468	1
Cdk2ap1	0.00112856	-0.564735	0.292	0.513	1
St6gal1	0.00113042	1.86517	0.146	0.049	1
Csf2	0.00113291	3.13002	0.104	0.026	1
Vcpkmt	0.00113672	-0.984656	0.115	0.299	1
2610524H06Rik	0.001141	-0.991524	0.125	0.302	1
Esco1	0.00114209	-0.743984	0.198	0.406	1
2010111I01Rik	0.00114416	-0.314654	0.521	0.795	1
Lrrc32	0.00115989	3.24072	0.125	0.039	1
Zfp644	0.00116354	-0.277514	0.375	0.63	1
Acadl	0.00116995	-0.515944	0.344	0.552	1
Ipcef1	0.00117451	-0.824059	0.156	0.351	1
Eif2s3x	0.00117905	-0.683203	0.281	0.5	1
Lax1	0.00119895	-1.01323	0.156	0.341	1
Syf2	0.00119955	-0.366042	0.646	0.854	1
Gnaq	0.00122381	1.8166	0.312	0.192	1
Gm47015	0.00122807	-1.00628	0.083	0.244	1
Med16	0.00124391	-0.675167	0.125	0.305	1
Atp5k	0.00124745	-0.394655	0.75	0.938	1
Gclm	0.00126304	-1.36919	0.073	0.224	1
Dnttip1	0.00126436	-0.345223	0.188	0.403	1
Cmas	0.0012684	-0.397472	0.25	0.471	1
Runx2os1	0.0012688	-1.36251	0.042	0.179	1
Ppp1r12c	0.00127089	-0.591802	0.26	0.484	1
Tomm6	0.00127343	-0.968855	0.104	0.276	1
Thyn1	0.00129591	-0.71491	0.125	0.302	1
Rab18	0.00131133	-0.556543	0.302	0.523	1
E130308A19Rik	0.0013124	-1.04539	0.073	0.234	1
Ptpn6	0.00131692	-0.992602	0.271	0.451	1
Glg1	0.00131844	-0.584065	0.208	0.416	1
Dguok	0.00131916	-0.603272	0.208	0.406	1
Leo1	0.0013224	-0.890471	0.062	0.208	1
Gimap5	0.0013246	-0.327122	0.708	0.896	1
Actr5	0.00133123	-0.957389	0.094	0.256	1
Ak2	0.00134074	-0.524478	0.427	0.675	1
Plekhf2	0.00134265	-0.558534	0.167	0.367	1
Rab10	0.00134282	-0.379256	0.469	0.701	1
Hexim1	0.00134945	-0.555376	0.406	0.636	1
Rngtt	0.00135443	-0.624733	0.198	0.403	1
Ap5m1	0.00135822	-1.10395	0.042	0.179	1
Hadha	0.00135841	-0.51546	0.323	0.558	1
Suds3	0.00135841	-0.265787	0.271	0.506	1
Golga7	0.0013735	-0.719058	0.292	0.503	1
Fam126a	0.00138367	3.23206	0.167	0.068	1
Tnfaip8l2	0.00139497	-0.974634	0.115	0.279	1
Wdfy1	0.0014101	-1.00325	0.083	0.244	1
Mff	0.0014194	-0.290114	0.271	0.516	1
4933427D14Rik	0.00143318	-1.29912	0.031	0.159	1
St6galnac3	0.00143649	-0.538801	0.146	0.338	1
Ets2	0.00143813	1.47669	0.333	0.205	1
Frmd5	0.00145618	3.74701	0.073	0.013	1
Ccr3	0.00145618	4.22397	0.073	0.013	1
Zmat3	0.00145661	-0.333221	0.052	0.198	1
Gfod1	0.00146858	-0.593679	0.094	0.26	1
Mrpl42	0.00147235	-0.472002	0.26	0.481	1
Nrbf2	0.00147344	-0.870982	0.167	0.347	1
Pqbp1	0.00147918	-0.624678	0.208	0.403	1
Ier2	0.00148611	-0.369989	0.688	0.877	1
Ric1	0.00148641	-0.538284	0.208	0.422	1
Zfp24	0.00149722	-0.521691	0.115	0.289	1
Atp5g3	0.00150137	-0.309198	0.646	0.88	1
Cd3eap	0.00152136	-1.76203	0.01	0.12	1
Sgta	0.00152551	-0.444557	0.208	0.406	1
Tmed9	0.00152625	-0.387643	0.594	0.844	1
Taf3	0.00154463	-0.72284	0.135	0.318	1
S100a11	0.00154615	-0.349007	0.802	0.968	1
Ikbkb	0.00155596	-0.348983	0.271	0.51	1
Dcaf7	0.00156968	-0.965637	0.146	0.325	1
Parl	0.00157396	-0.882988	0.188	0.377	1
Lrrfip1	0.00158791	-0.42819	0.531	0.747	1
Nfil3	0.00159062	0.893052	0.594	0.513	1
Adh5	0.00159929	-0.581497	0.281	0.51	1
Suco	0.00160663	-0.529487	0.406	0.64	1
Mrpl41	0.0016094	-0.601263	0.219	0.435	1
Ube2e1	0.00162559	-0.25328	0.219	0.455	1
Cebpb	0.00162577	0.937789	0.688	0.718	1
Terf1	0.00163016	-0.439287	0.094	0.26	1
Zbtb20	0.00163063	1.5425	0.396	0.276	1
Smchd1	0.00163114	-0.33104	0.521	0.776	1
Aak1	0.00163511	-0.324605	0.219	0.438	1
Tsc22d1	0.00163673	2.63291	0.094	0.023	1
Snrpa1	0.00163979	-0.462762	0.323	0.549	1
Atp5c1	0.00164431	-0.363531	0.719	0.899	1
Raf1	0.00164987	-0.594733	0.323	0.552	1
Hdgf	0.00166005	-0.394387	0.385	0.63	1
Akr1b3	0.00166479	-0.491289	0.406	0.64	1
Prdx2	0.0016742	-0.460046	0.562	0.799	1
Mki67	0.00168885	-0.948894	0.083	0.244	1
Gm33104	0.00169971	-0.562656	0.188	0.393	1
Lzic	0.00171344	-1.19091	0.073	0.221	1
Vgll4	0.00173208	-0.412441	0.719	0.883	1
Klk1b9	0.00173611	-2.48881	0.01	0.117	1
Pgm1	0.00174422	-1.5618	0.031	0.153	1
Adam17	0.00174774	-1.07463	0.156	0.328	1
Slc29a1	0.001758	-0.880749	0.146	0.318	1
Slc31a1	0.00176827	-1.30151	0.042	0.172	1
Skiv2l2	0.00177764	-0.485498	0.292	0.526	1
Sdhc	0.0017795	-0.362312	0.198	0.399	1
H2afj	0.00178971	-0.367959	0.729	0.916	1
Rcsd1	0.00179506	1.16867	0.448	0.325	1
Cdc23	0.00179686	-1.5626	0.021	0.136	1
Ebag9	0.00180514	-1.38136	0.094	0.244	1
Zfp106	0.00182302	-0.492395	0.229	0.429	1
Snx15	0.00182853	-1.21704	0.083	0.234	1
Smim27	0.00183809	-0.578148	0.156	0.347	1
Rsu1	0.00183956	-0.720659	0.177	0.37	1
Rgs2	0.00184032	1.33131	0.781	0.782	1
Taf13	0.00184118	-1.0856	0.167	0.334	1
Vps36	0.00184633	-0.323332	0.302	0.513	1
Ppm1m	0.0018521	-1.11	0.104	0.263	1
Psme2	0.0018636	-0.371316	0.854	0.961	1
Jak3	0.00186551	-0.59427	0.271	0.487	1
Coq7	0.00187679	-2.18861	0.021	0.133	1
Prelid2	0.00188225	-1.07883	0.135	0.305	1
Vdr	0.00189135	1.79012	0.135	0.045	1
Cpxm1	0.00189154	3.58124	0.031	0	1
Cd93	0.00189154	4.63406	0.031	0	1
Kcnk1	0.00189154	4.19046	0.031	0	1
Dmxl2	0.00189154	3.97762	0.031	0	1
Stxbp6	0.00189154	4.68708	0.031	0	1
Otub2	0.00189154	4.09483	0.031	0	1
Ighd	0.00189154	4.32312	0.031	0	1
Prickle1	0.00189154	3.88491	0.031	0	1
Krt80	0.00189154	4.06937	0.031	0	1
Pram1	0.00189154	3.64083	0.031	0	1
Ecscr	0.00189154	4.31718	0.031	0	1
Gm48242	0.00189154	4.21712	0.031	0	1
Prex1	0.00189688	-0.489563	0.417	0.656	1
Slc25a4	0.00190272	-0.446252	0.5	0.75	1
Nipsnap2	0.00190394	-0.268875	0.062	0.208	1
Chic2	0.00190539	-0.506992	0.448	0.653	1
Ptpn1	0.00191544	-0.365812	0.604	0.795	1
Plcl2	0.00191597	-0.727805	0.146	0.318	1
Prps1	0.00193066	-0.476683	0.125	0.302	1
Ndufb2	0.00193101	-0.440997	0.385	0.614	1
Rpp21	0.00195539	-0.504917	0.292	0.519	1
Gosr1	0.00195748	-0.84608	0.125	0.292	1
Fam220a	0.00195824	-0.683561	0.146	0.334	1
Eny2	0.00196544	-0.61454	0.385	0.594	1
Dmac1	0.00196767	-0.934169	0.167	0.347	1
Klhdc10	0.00197387	-1.09945	0.021	0.136	1
Rbx1	0.00197413	-0.306082	0.708	0.87	1
2310031A07Rik	0.00197545	-1.87648	0.031	0.153	1
Zrsr2	0.00197693	-0.558639	0.26	0.471	1
Ccr5	0.00198827	-0.347878	0.438	0.711	1
Magoh	0.00199776	-0.527689	0.479	0.727	1
Ddx47	0.00201734	-0.388782	0.188	0.383	1
G6pdx	0.00201971	-1.035	0.031	0.156	1
Ramp3	0.002029	1.84017	0.375	0.256	1
Scaf4	0.00203192	-0.662597	0.052	0.192	1
Vdac3	0.00204471	-0.336999	0.354	0.588	1
Emc8	0.00204833	-1.11314	0.083	0.231	1
Zc3h4	0.00205676	-0.685084	0.156	0.334	1
Stk16	0.00206503	-0.44865	0.146	0.321	1
Dynlrb1	0.00206563	-0.435226	0.646	0.847	1
Prpf31	0.00207632	-0.349435	0.156	0.351	1
Lasp1	0.0020769	-0.38664	0.312	0.523	1
Klrb1f	0.00208861	-1.77743	0.042	0.166	1
Frmd8	0.00209047	-0.331051	0.229	0.445	1
A630023P12Rik	0.00209214	-0.781505	0.073	0.221	1
Mrpl4	0.00209345	-0.441953	0.271	0.494	1
Atp5l	0.00209964	-0.263776	0.917	0.981	1
Pop4	0.00210148	-0.715281	0.229	0.419	1
Nkiras1	0.00211154	-1.19458	0.052	0.185	1
Bloc1s6	0.00211597	-1.21321	0.073	0.218	1
Klk1b27	0.0021197	-2.51032	0.01	0.114	1
Pspc1	0.00213499	-0.279848	0.167	0.37	1
Camta1	0.00213561	-0.715989	0.156	0.334	1
Zc3h13	0.00214306	-0.593218	0.396	0.584	1
Arhgap18	0.00214399	-0.704036	0.135	0.305	1
Zdhhc3	0.00216049	-0.319782	0.219	0.429	1
Rpgrip1	0.00217633	-0.365618	0.052	0.192	1
Nosip	0.00218988	-0.319394	0.24	0.445	1
Chmp2a	0.002192	-0.476368	0.635	0.812	1
Maml2	0.00219853	-1.29541	0.042	0.169	1
Mphosph6	0.00220545	-0.568527	0.25	0.471	1
Eif3j1	0.00221146	-0.323383	0.448	0.669	1
Jag1	0.00221217	3.40421	0.062	0.01	1
Unc50	0.00221987	-0.882658	0.115	0.282	1
Atg3	0.00223658	-0.571801	0.26	0.471	1
Map1b	0.00224127	2.53548	0.062	0.01	1
Ptgir	0.00225009	2.21557	0.104	0.029	1
Ccr8	0.00225125	1.65822	0.323	0.208	1
Ccl27a	0.00225313	-2.86685	0	0.091	1
Ccdc136	0.00225313	-2.9187	0	0.091	1
Rasgef1a	0.00225313	-3.41232	0	0.091	1
Plscr3	0.00225313	-3.0676	0	0.091	1
Trbv12-2	0.00225313	-3.22222	0	0.091	1
Snai3	0.00225313	-3.07937	0	0.091	1
Cct7	0.00227975	-0.414676	0.604	0.828	1
Cdpf1	0.00228488	-1.51812	0.042	0.166	1
Nabp2	0.00228729	-0.770403	0.229	0.419	1
Dbi	0.00229266	-0.362266	0.438	0.708	1
Elof1	0.00229349	-0.264419	0.292	0.532	1
Tbc1d15	0.00230109	-0.470275	0.188	0.38	1
Shkbp1	0.0023041	-0.487076	0.146	0.331	1
Rbm42	0.00230531	-0.339599	0.365	0.61	1
H2afx	0.00230673	-0.771764	0.135	0.305	1
Pnkd	0.00231469	-0.74467	0.229	0.425	1
Trpm4	0.00232329	-1.77513	0.021	0.13	1
Srp14	0.00232549	-0.389396	0.688	0.896	1
Baiap2	0.00232816	-1.02281	0.083	0.234	1
Ube2g1	0.00233058	-0.859302	0.167	0.334	1
Glrx5	0.00233098	-0.498374	0.281	0.497	1
Dap3	0.00233598	-0.506413	0.24	0.429	1
Parg	0.00235155	-0.429084	0.115	0.282	1
Tmem101	0.00235196	-2.48101	0.01	0.11	1
Apex1	0.00235948	-1.13136	0.073	0.218	1
Phf23	0.00236634	-0.793732	0.073	0.221	1
Tmem243	0.00239274	-0.392409	0.302	0.519	1
Snx16	0.00239735	-1.85797	0.021	0.13	1
Ube2o	0.00239788	-0.56289	0.062	0.201	1
Zmym4	0.0023992	-0.872421	0.052	0.185	1
Fbxo42	0.00240256	-1.60608	0.042	0.166	1
0610010K14Rik	0.00243404	-0.801404	0.167	0.344	1
Denr	0.00244012	-0.490363	0.49	0.721	1
Mob2	0.00244406	-0.405096	0.25	0.445	1
Naca	0.00244416	-0.256911	0.938	0.99	1
Txlna	0.00244902	-0.35135	0.156	0.334	1
Wdr83	0.00245382	-0.779838	0.052	0.188	1
Ccdc25	0.00245921	-0.335704	0.271	0.497	1
Hddc2	0.00246512	-0.506378	0.146	0.321	1
Wdr82	0.00247055	-0.729289	0.281	0.487	1
Gid8	0.00247195	-0.609666	0.104	0.263	1
Upf3a	0.00249319	-0.571791	0.167	0.357	1
Eif1ad	0.00250434	-0.880446	0.229	0.399	1
Dok1	0.00252296	-0.935034	0.115	0.273	1
1110032A03Rik	0.00252849	-1.20689	0.062	0.195	1
Tmem106b	0.00253663	-0.879359	0.177	0.36	1
Cerk	0.00256269	2.59005	0.188	0.088	1
Selenof	0.00258793	-0.363154	0.531	0.763	1
Hsd11b1	0.00260066	-0.54783	0.188	0.38	1
Gnl1	0.00260261	-0.283415	0.26	0.471	1
Chd4	0.0026099	-0.45967	0.625	0.825	1
Pqlc3	0.00262206	-0.57505	0.167	0.354	1
Selenos	0.0026271	-0.398674	0.521	0.766	1
Orai2	0.00262912	-0.624077	0.125	0.286	1
Traf7	0.00263452	-0.302399	0.104	0.266	1
Card6	0.00263786	-1.85339	0.031	0.146	1
Nasp	0.00266146	-0.424496	0.385	0.581	1
Hsd17b10	0.00267095	-0.555997	0.312	0.532	1
Sdf4	0.00268267	-0.364897	0.875	0.961	1
Znrf2	0.0026989	-0.530986	0.302	0.513	1
Trim21	0.00270036	-1.80133	0.031	0.146	1
Tomm40	0.0027028	-0.464277	0.156	0.334	1
Gnai2	0.00270599	-0.254833	0.885	0.971	1
Lzts1	0.00271155	-1.40536	0.01	0.11	1
Galnt7	0.0027168	-0.473689	0.125	0.295	1
Psmd3	0.0027276	-0.497643	0.219	0.412	1
Ilvbl	0.00274424	-0.580295	0.156	0.321	1
Ms4a6c	0.00276044	-0.38368	0.125	0.279	1
Tomm20	0.00276191	-0.338803	0.74	0.951	1
Dnajc10	0.00278924	-0.532964	0.094	0.253	1
Rpa3	0.00279304	-0.489507	0.146	0.321	1
Med30	0.00280697	-0.379509	0.302	0.513	1
Armc7	0.00280748	-1.00006	0.062	0.198	1
Brd4	0.00280993	-0.503943	0.458	0.662	1
6430573P05Rik	0.00281398	2.90381	0.052	0.006	1
Slco2b1	0.00281398	2.67655	0.052	0.006	1
Sparc	0.00281975	1.81356	0.177	0.078	1
Gpx4	0.00282377	0.570882	0.844	0.864	1
Saa3	0.00282652	-0.290159	0.333	0.61	1
Limk1	0.00282927	-1.44312	0.052	0.179	1
Med26	0.00283051	-2.60659	0.01	0.107	1
Zfp688	0.00287369	-0.62927	0.031	0.149	1
Ube2h	0.00288474	-0.462401	0.375	0.575	1
Azi2	0.00289092	-0.563519	0.281	0.49	1
Mettl21c	0.00289661	2.75567	0.052	0.006	1
Usp38	0.002899	-0.314892	0.25	0.474	1
Slc25a10	0.00290511	1.96688	0.083	0.019	1
Slc25a16	0.00291055	-0.934268	0.052	0.182	1
Rorc	0.00291057	4.23856	0.042	0.003	1
Grk3	0.00291057	4.01435	0.042	0.003	1
Lonrf1	0.00291057	4.97652	0.042	0.003	1
Apol9a	0.00291057	4.38725	0.042	0.003	1
Prr29	0.00291057	3.39278	0.042	0.003	1
mt-Nd6	0.00291536	-0.379068	0.208	0.403	1
Med6	0.00292728	-1.9164	0.021	0.127	1
Gm14029	0.00293231	-2.0282	0.031	0.143	1
Rnaseh2a	0.00294443	-0.461422	0.094	0.247	1
Snx27	0.0029486	-1.24024	0.042	0.162	1
Spred2	0.00295911	-1.59528	0.052	0.175	1
Nol8	0.00295911	-1.73505	0.052	0.175	1
Fam241b	0.00296058	3.53018	0.042	0.003	1
A630001O12Rik	0.00296058	3.46802	0.042	0.003	1
Tha1	0.00296058	3.23884	0.042	0.003	1
Rab19	0.00298062	-0.454055	0.146	0.318	1
Mrpl46	0.00298837	-0.447934	0.125	0.302	1
Trappc11	0.0030143	-1.23627	0.042	0.162	1
Herpud1	0.00303231	-0.623083	0.333	0.536	1
Bin3	0.00303848	-0.5346	0.167	0.357	1
Cndp2	0.00304402	-0.299863	0.219	0.412	1
Sin3a	0.00304524	-0.454441	0.083	0.231	1
Borcs8	0.00305043	-0.485211	0.26	0.487	1
Hist3h2ba	0.00305518	-1.24355	0.073	0.211	1
Cog1	0.00307692	-0.601675	0.083	0.234	1
Fundc2	0.00309008	-0.490113	0.448	0.649	1
Atg2a	0.00309146	-0.534063	0.271	0.461	1
Ikbkap	0.00309562	-1.90022	0.021	0.127	1
Rab29	0.00311535	-1.22158	0.042	0.162	1
Bet1l	0.00315536	-0.57371	0.229	0.419	1
D030056L22Rik	0.00315764	-0.883054	0.125	0.279	1
Gm30054	0.00317644	-0.922735	0.073	0.211	1
Psma6	0.00318415	-0.35971	0.469	0.718	1
Psma7	0.00319621	-0.291546	0.781	0.899	1
Itpkc	0.00319687	-2.03296	0.01	0.107	1
Ccnh	0.00319931	-0.785953	0.135	0.295	1
Pafah1b1	0.00320514	-0.373647	0.625	0.828	1
Aldoc	0.00321013	-1.29156	0.052	0.179	1
Cracr2a	0.00321399	-1.04686	0.031	0.146	1
Xist	0.00321766	0.626678	0.938	0.971	1
Rabgap1l	0.00323236	-0.52318	0.479	0.727	1
Zc3h6	0.00323255	-0.710889	0.031	0.146	1
Rps19bp1	0.00323325	-0.716566	0.125	0.286	1
H3f3a	0.00325348	-0.260094	0.896	0.971	1
Stx6	0.00327419	-0.360445	0.198	0.38	1
Sntb2	0.0032806	-1.26521	0.083	0.221	1
Polr2d	0.00329076	-0.871924	0.094	0.237	1
Tbkbp1	0.00329499	-1.65122	0.031	0.143	1
Smurf2	0.00329531	-0.640552	0.094	0.24	1
Fam117b	0.00331493	-0.41837	0.323	0.545	1
Tcf3	0.00331653	-0.649843	0.167	0.354	1
Xcl1	0.00332447	-5.20014	0	0.084	1
Psd	0.00332447	-2.75075	0	0.084	1
Ap2m1	0.00332979	-0.359141	0.51	0.711	1
Myl12b	0.00336049	-0.298007	0.906	0.971	1
Tmem161a	0.00336327	-1.28447	0.042	0.162	1
Fam160b1	0.00337253	-0.273954	0.135	0.312	1
Polr2j	0.00340902	-0.304874	0.344	0.555	1
Ndufb9	0.00342898	-0.303811	0.656	0.864	1
Pin1	0.00343429	-0.557114	0.25	0.455	1
Fam213a	0.00343787	1.55679	0.24	0.123	1
Ccni	0.00344932	-0.33536	0.469	0.721	1
Psmc2	0.00346387	-0.271109	0.323	0.558	1
Endod1	0.00346545	-0.263713	0.177	0.36	1
Pex7	0.00348066	-0.900118	0.125	0.276	1
Lta	0.00349008	-1.32937	0.073	0.208	1
Whamm	0.0034941	-0.538335	0.167	0.341	1
H2-Q6	0.00349944	0.354608	0.938	0.925	1
Ptp4a3	0.00349947	-0.472842	0.24	0.432	1
Dlat	0.00350739	-1.23748	0.062	0.192	1
Stip1	0.00351596	-0.639177	0.26	0.451	1
Tox	0.00352754	2.08937	0.281	0.175	1
Lrrk1	0.0035277	-0.417028	0.052	0.182	1
Hivep2	0.00354016	-0.414816	0.302	0.526	1
Zfpl1	0.00354107	-1.04005	0.094	0.237	1
Adarb1	0.00355867	3.55077	0.125	0.045	1
Pkp3	0.00355909	-0.390857	0.552	0.766	1
Sod2	0.00357277	-0.259048	0.458	0.698	1
F2r	0.00359099	1.21508	0.5	0.429	1
Fam58b	0.00359367	-0.445934	0.104	0.263	1
Taf11	0.00362273	-0.726335	0.156	0.321	1
Nsmf	0.00363832	-0.378842	0.052	0.182	1
Tfdp1	0.00364259	-0.842301	0.094	0.24	1
Glod4	0.00364766	-0.481456	0.167	0.357	1
Trdc	0.00365027	5.46229	0.073	0.016	1
Atp2c1	0.00365307	-0.424108	0.177	0.364	1
Snrpc	0.0036932	-0.398775	0.479	0.74	1
Ccdc138	0.00371726	-2.2479	0.01	0.104	1
Sh3bgrl	0.00372361	0.936607	0.552	0.5	1
Iah1	0.00373874	-0.443708	0.177	0.364	1
Ttc19	0.00374272	-0.412051	0.25	0.477	1
2310033P09Rik	0.00374806	-0.763123	0.156	0.325	1
Rasgef1b	0.00375109	2.56209	0.125	0.045	1
Med15	0.00375213	1.04174	0.51	0.425	1
Cyp4f16	0.00376757	-2.08264	0.01	0.104	1
Gnptab	0.00378848	-1.07519	0.073	0.208	1
Cdk6	0.00379828	0.791232	0.667	0.659	1
Snrnp40	0.00380842	-0.56686	0.229	0.422	1
Herpud2	0.00381862	-0.616243	0.156	0.331	1
Krit1	0.00382554	-0.37537	0.417	0.656	1
Ndufa7	0.00386037	-0.270061	0.708	0.909	1
Asnsd1	0.00386891	-0.580871	0.177	0.357	1
Wfdc17	0.00388746	-0.264633	0.104	0.263	1
Myo3b	0.00389579	2.81096	0.073	0.016	1
Taf12	0.00391202	-0.398432	0.208	0.422	1
Cep295	0.0039336	-1.45217	0.073	0.201	1
Ube2q1	0.00393507	-0.379653	0.375	0.604	1
Pik3cb	0.00393814	2.92481	0.073	0.016	1
Fbxo8	0.00397459	-0.555402	0.135	0.295	1
Psmb2	0.00397714	-0.377995	0.531	0.737	1
Plcg1	0.00398389	-0.358702	0.292	0.503	1
Pex5	0.00399722	-2.09762	0.031	0.136	1
Sell	0.00400416	2.09724	0.135	0.052	1
Ttll12	0.00401026	-1.4113	0.042	0.156	1
Ostc	0.00401043	-0.378466	0.51	0.753	1
Map3k1	0.0040169	-0.358159	0.198	0.396	1
Idh3a	0.00402601	-0.49726	0.24	0.432	1
Ddx41	0.00403619	-0.414829	0.208	0.396	1
Zfp628	0.00404278	-2.23971	0.021	0.12	1
D5Ertd579e	0.0040547	-0.49445	0.208	0.399	1
Bcap29	0.00406517	1.44383	0.396	0.315	1
Pex16	0.00407876	-0.784892	0.156	0.318	1
Romo1	0.00408167	-0.291193	0.594	0.786	1
Crebrf	0.00408357	-0.514176	0.177	0.357	1
Cyb561d1	0.00408859	-1.43626	0.021	0.123	1
Gm21988	0.00409383	-2.54837	0.01	0.101	1
Rprd2	0.00409813	-0.95199	0.177	0.338	1
1700025G04Rik	0.00414342	-1.42031	0.042	0.156	1
Tpgs1	0.00414695	-0.685599	0.125	0.279	1
Snx17	0.00415584	-0.49	0.271	0.481	1
Gtf2f1	0.00417417	-0.36135	0.302	0.523	1
Epb41l2	0.00418882	1.29253	0.417	0.331	1
Fdft1	0.00419614	-0.700421	0.042	0.162	1
Atraid	0.0042048	-0.355986	0.24	0.438	1
Tox4	0.00421283	-0.287081	0.49	0.714	1
Usp37	0.00422504	-0.52498	0.115	0.269	1
Kcnab2	0.00422566	-0.578409	0.208	0.403	1
Dnajc4	0.0042291	-0.591758	0.073	0.208	1
Zfp87	0.00423518	-0.961465	0.073	0.211	1
Gm26870	0.00424102	3.26923	0.188	0.091	1
Gramd1b	0.00424278	-0.317305	0.125	0.295	1
Hmgn2	0.0042486	-0.341231	0.375	0.623	1
Lyrm1	0.0042514	-1.10118	0.042	0.159	1
Ppm1j	0.00426654	-1.35283	0.062	0.185	1
Fam76b	0.00428309	-0.542239	0.167	0.328	1
Neu1	0.00428549	-0.506972	0.156	0.334	1
Med25	0.00430423	-0.330511	0.125	0.289	1
Ttc33	0.00430589	-1.50395	0.042	0.153	1
Eif2s1	0.00430992	-0.481455	0.344	0.555	1
Ankrd16	0.00432659	-1.89459	0.021	0.12	1
Desi2	0.00434279	-0.643656	0.167	0.344	1
Pfdn5	0.00435099	-0.261029	0.906	0.984	1
Ccnd2	0.0043832	0.685479	0.865	0.903	1
Ate1	0.00438479	-0.633124	0.135	0.292	1
Cdadc1	0.00439106	-0.599547	0.115	0.266	1
Cep97	0.00439284	-1.23983	0.062	0.188	1
Acadvl	0.00443282	-0.488368	0.188	0.37	1
Atp6v0a2	0.00444892	-0.415639	0.188	0.38	1
Ccdc32	0.00446903	-0.486637	0.083	0.227	1
Bora	0.00448701	-1.12627	0.052	0.172	1
Nfs1	0.00449892	-0.687574	0.094	0.237	1
Fam107b	0.00451194	0.647024	0.885	0.919	1
Slc25a28	0.00452325	-1.21284	0.073	0.201	1
Mnt	0.00452555	-0.353737	0.167	0.341	1
Prrt1	0.00453828	-0.461393	0.115	0.273	1
Dpm1	0.00453917	-0.575388	0.312	0.503	1
Cox10	0.00454138	-1.69115	0.052	0.166	1
Utp18	0.0045484	-0.431141	0.156	0.321	1
Angel2	0.00456692	-0.592097	0.229	0.416	1
Usf3	0.00458604	-0.798488	0.083	0.218	1
Ccdc115	0.00461987	-0.534446	0.167	0.344	1
Gm28935	0.00462834	-1.62089	0.021	0.12	1
Rab28	0.00463476	-0.492655	0.083	0.227	1
Pdap1	0.00467524	-0.401409	0.542	0.744	1
Rock1	0.00467724	-0.327802	0.625	0.805	1
Pag1	0.00469801	-0.618888	0.26	0.464	1
Psmb4	0.00470938	-0.266838	0.656	0.841	1
C230024C17Rik	0.00471407	-1.59311	0.01	0.101	1
Tiparp	0.00471429	1.03671	0.5	0.406	1
Polr3k	0.00473414	-0.829161	0.188	0.364	1
AI413582	0.0047344	-0.275485	0.208	0.403	1
Trir	0.0047413	-0.29342	0.625	0.821	1
Borcs6	0.00474431	-0.485848	0.094	0.24	1
Lrpap1	0.00475638	-0.601818	0.177	0.351	1
Rtca	0.0047584	-0.736273	0.083	0.218	1
Coa5	0.00476901	-0.525868	0.281	0.468	1
Acot11	0.00476982	3.31537	0.083	0.023	1
Sptan1	0.00479444	-0.358904	0.417	0.653	1
Tpr	0.00481113	-0.275019	0.729	0.851	1
Plekhb2	0.00482313	-0.268158	0.292	0.5	1
Pitpnb	0.00483113	-0.415929	0.135	0.305	1
Ints12	0.00484258	-1.35666	0.062	0.185	1
Rnf43	0.00484744	-0.786063	0.031	0.14	1
Gab2	0.00486152	3.24098	0.083	0.023	1
Cyb5r4	0.00486445	-0.335984	0.198	0.373	1
Ndufaf1	0.00488937	-0.966188	0.031	0.136	1
Kat8	0.00488937	-1.73824	0.031	0.136	1
Nrarp	0.00489854	-2.95222	0	0.078	1
Kxd1	0.00490675	-0.390013	0.354	0.584	1
Mdh2	0.00490714	-0.296224	0.646	0.812	1
Ube2g2	0.00491154	-0.648297	0.167	0.328	1
Tubb5	0.0049246	0.500003	0.792	0.821	1
Wbp11	0.00492711	-0.472904	0.448	0.649	1
Coa7	0.00494284	-1.10205	0.052	0.169	1
Sash3	0.0049609	-0.37599	0.312	0.516	1
Ccdc59	0.0049889	-0.423842	0.385	0.571	1
Adgrl1	0.00502492	-0.326431	0.062	0.185	1
Lars	0.00504125	-0.682606	0.198	0.364	1
Tbc1d2b	0.00505655	-0.730693	0.156	0.312	1
Fam193b	0.00505982	-0.337478	0.073	0.208	1
Tmem30a	0.00510354	0.658462	0.667	0.614	1
Akirin2	0.00512389	-0.506807	0.229	0.416	1
Rmnd5a	0.00515724	-0.335525	0.146	0.315	1
Dnajc2	0.00517295	-0.414348	0.333	0.581	1
Gpr180	0.00517397	-1.95771	0.021	0.117	1
Naa40	0.00519174	-1.19851	0.073	0.195	1
Slc25a24	0.00520236	-0.68677	0.135	0.289	1
Smarca5	0.00521986	-0.263545	0.583	0.805	1
Fech	0.00523219	-1.15065	0.042	0.153	1
Dmac2	0.00524989	-0.534093	0.094	0.24	1
Xrn2	0.00525524	-0.314776	0.51	0.724	1
Uba2	0.00526106	-0.40852	0.292	0.497	1
Elp5	0.00526603	-0.653444	0.135	0.289	1
Pkmyt1	0.00529763	1.56177	0.135	0.052	1
Lin7c	0.00529859	-0.435533	0.292	0.516	1
Tfam	0.00530649	-0.504194	0.135	0.286	1
Acaa2	0.00531228	-0.552542	0.167	0.338	1
Rp9	0.00531652	-0.393087	0.469	0.685	1
Hnrnpa3	0.00535849	-0.250764	0.885	0.961	1
Smg7	0.0053698	-0.560224	0.177	0.351	1
Tsn	0.00537134	-0.376686	0.49	0.711	1
Mgat2	0.0053776	-0.37305	0.281	0.477	1
Dcaf12	0.00538315	-0.514644	0.156	0.321	1
Ormdl1	0.00540464	-0.785909	0.115	0.263	1
Eif2s2	0.00544058	-0.281603	0.771	0.961	1
Emc3	0.00544102	-0.469332	0.292	0.484	1
Ggct	0.00545173	-0.912083	0.125	0.266	1
Rnf111	0.00545593	-0.737305	0.177	0.341	1
Usmg5	0.00545758	-0.273726	0.729	0.909	1
Ccnk	0.00546242	-0.545267	0.188	0.36	1
Ppt2	0.00547027	-0.470503	0.146	0.315	1
Utp23	0.00547057	-0.681336	0.146	0.305	1
Ccl4	0.00547388	-1.21161	0.5	0.701	1
Ube2z	0.00549011	-0.625491	0.177	0.344	1
Tbpl1	0.00550064	-0.389866	0.135	0.299	1
Tob1	0.00550102	-0.387121	0.219	0.393	1
Tmem199	0.00550754	-0.501199	0.031	0.136	1
Ago1	0.00555055	-0.640972	0.062	0.182	1
Las1l	0.00556211	-0.2943	0.198	0.39	1
Mocs2	0.00558116	-0.605242	0.125	0.276	1
Tet3	0.00559639	-0.6165	0.208	0.39	1
Def6	0.00561741	-0.495945	0.281	0.474	1
Ulbp1	0.00562578	-1.85759	0.01	0.097	1
Cep164	0.0056784	-0.583659	0.062	0.185	1
Tgfb3	0.00568514	3.75889	0.062	0.013	1
Nudt16l1	0.00570771	-0.71422	0.135	0.286	1
2210016L21Rik	0.00571104	-0.278736	0.146	0.302	1
Eif4h	0.00572604	-0.263421	0.531	0.744	1
Pdcd7	0.00573726	-0.604237	0.083	0.218	1
Ube2r2	0.00574586	-0.399139	0.292	0.506	1
Ppp1r12a	0.00575327	-0.347831	0.688	0.86	1
Ncf1	0.00575348	-0.951818	0.104	0.237	1
Sars	0.00575443	-0.479911	0.49	0.675	1
Smndc1	0.00577909	-0.355024	0.365	0.562	1
Mtf2	0.00578551	-0.594785	0.219	0.393	1
Zfp287	0.00581587	-1.11763	0.01	0.097	1
Ppp1r18	0.00585241	-0.276455	0.708	0.87	1
Msi2	0.00585781	-0.268803	0.583	0.789	1
Bbs9	0.00586179	2.63869	0.094	0.029	1
Chm	0.00588187	-0.852437	0.115	0.256	1
2510009E07Rik	0.00588267	3.06448	0.062	0.013	1
Gon4l	0.00588727	-0.26782	0.177	0.347	1
Bcl6	0.0058891	-2.17664	0.021	0.114	1
Vps29	0.00592939	-0.414137	0.427	0.649	1
Stag1	0.00594197	-0.304996	0.302	0.51	1
Gm16225	0.00594381	-2.63476	0	0.075	1
Dapk2	0.00594581	-1.40554	0.031	0.133	1
2610008E11Rik	0.00595796	-0.951384	0.031	0.136	1
Klhl28	0.00599174	-0.26447	0.104	0.253	1
Dusp4	0.00599773	-0.376772	0.271	0.474	1
Emc4	0.0060259	-0.340396	0.208	0.39	1
Tmem14c	0.00603954	-0.497172	0.396	0.591	1
Coq9	0.00605422	-1.54799	0.052	0.162	1
Agfg2	0.00607695	-0.453109	0.062	0.185	1
2200002D01Rik	0.00608635	2.50083	0.062	0.013	1
Patz1	0.0061054	-0.9194	0.042	0.153	1
Fam78a	0.00612335	-0.613739	0.146	0.295	1
Clp1	0.00615555	-0.618265	0.146	0.305	1
Dgat1	0.00616137	1.05239	0.646	0.633	1
Tstd3	0.0061679	-0.964249	0.073	0.198	1
Paip1	0.00619426	-0.768689	0.083	0.214	1
Jtb	0.00623532	-0.581372	0.292	0.477	1
Tulp4	0.00623884	0.52605	0.333	0.526	1
Serpine2	0.00625916	-2.38757	0.021	0.114	1
Btbd11	0.00627879	-2.40285	0.01	0.094	1
Cd247	0.00633884	-0.277803	0.521	0.756	1
Gskip	0.00636235	-0.342106	0.219	0.406	1
Slc25a39	0.00637393	-0.550229	0.271	0.458	1
Micu1	0.00637926	-0.382552	0.104	0.244	1
Ap4s1	0.00640023	-0.526244	0.156	0.331	1
Prkce	0.00640615	-1.0641	0.052	0.166	1
Foxp4	0.00640648	-0.668338	0.104	0.244	1
Hist1h1b	0.00641296	-2.01318	0.021	0.114	1
Baz2a	0.00642111	-0.37521	0.271	0.477	1
0610037L13Rik	0.0064215	-0.792835	0.083	0.214	1
Rnf126	0.00642451	-0.697347	0.167	0.328	1
Rbm27	0.0064376	-0.347626	0.25	0.445	1
Nif3l1	0.00643835	-0.890818	0.094	0.227	1
Cct5	0.00646681	-0.291692	0.542	0.75	1
Nop9	0.00649255	-1.01426	0.094	0.221	1
Tmem64	0.00649301	1.12941	0.375	0.273	1
Kcnk6	0.00651289	2.43231	0.062	0.013	1
Ppp2r3c	0.0065176	-0.60119	0.115	0.263	1
Aurkaip1	0.00652483	-0.342015	0.531	0.756	1
Phf12	0.00652521	-0.328256	0.156	0.328	1
Apopt1	0.00654057	-0.454429	0.229	0.419	1
Gramd4	0.00654471	2.12295	0.24	0.143	1
Ucp2	0.00655131	-0.303636	0.865	0.948	1
Rnf13	0.00656095	-0.448954	0.135	0.292	1
Zfr	0.00656473	-0.319762	0.188	0.351	1
Kctd2	0.00656797	-0.838822	0.146	0.292	1
Cox20	0.00658831	-0.304263	0.417	0.653	1
Asna1	0.00659608	-0.664232	0.198	0.36	1
Chpt1	0.00660272	-0.853065	0.083	0.201	1
Pgp	0.00661134	-0.54597	0.115	0.256	1
Gosr2	0.00661404	-0.298298	0.208	0.396	1
Csnk1e	0.0066468	-0.448079	0.167	0.328	1
Ss18l2	0.00665812	-1.10165	0.062	0.179	1
Cdc123	0.00666596	-0.589349	0.198	0.357	1
Arfip1	0.00667632	-0.558508	0.042	0.153	1
Zfp318	0.00667632	-0.695423	0.042	0.153	1
Got2	0.00668805	-0.299197	0.344	0.539	1
Tjap1	0.00671163	-1.56667	0.042	0.146	1
S100a6	0.00671336	0.850973	0.854	0.867	1
Terf2ip	0.00671602	-0.956637	0.083	0.211	1
Yeats4	0.00671865	-0.312035	0.281	0.474	1
Dda1	0.0067287	-0.404892	0.396	0.571	1
Ramp1	0.00673024	1.27189	0.469	0.377	1
Lsm4	0.00674777	-0.342416	0.635	0.786	1
Coq10b	0.00675196	-0.30374	0.417	0.679	1
Lsm7	0.00676336	-0.316144	0.24	0.432	1
Tjp2	0.00677149	-0.741346	0.021	0.114	1
Rbm33	0.00679019	-0.327355	0.333	0.552	1
Zfx	0.0067961	-0.707573	0.156	0.312	1
Taf6l	0.00680723	-0.274749	0.365	0.578	1
Ttbk1	0.00684634	-1.58195	0.01	0.094	1
Tspo	0.00685223	-0.251075	0.771	0.932	1
Rbm18	0.00685698	-0.54843	0.135	0.289	1
Hmgb3	0.00685701	-0.868133	0.073	0.195	1
Adcy7	0.00688092	-0.394244	0.26	0.458	1
Il9r	0.00688868	1.84379	0.062	0.013	1
Slc52a3	0.00689185	-1.88839	0.01	0.094	1
Hyal1	0.00689185	-1.55096	0.01	0.094	1
Ndufb5	0.00689627	-0.436666	0.562	0.744	1
Mrpl21	0.00691302	-0.397372	0.281	0.455	1
Ifrd1	0.00691699	0.655535	0.729	0.802	1
Hars	0.00692801	-0.32546	0.188	0.37	1
Ndufa9	0.00694726	-0.390875	0.229	0.429	1
Gdi1	0.00694795	-0.546905	0.156	0.308	1
Ufsp2	0.0069495	-0.435105	0.104	0.24	1
Pdzd11	0.00696323	-0.371335	0.125	0.276	1
Rwdd4a	0.0069974	-0.927727	0.094	0.224	1
Fbxo6	0.00699742	-0.463285	0.146	0.305	1
Guf1	0.00700302	-1.00464	0.042	0.146	1
Riok3	0.00701306	-0.417134	0.25	0.455	1
Nmb	0.00702292	-0.380648	0.229	0.422	1
Men1	0.00703002	-1.40137	0.01	0.094	1
Foxp1	0.00705	0.82124	0.615	0.549	1
Zfp771	0.00705047	-0.794915	0.052	0.162	1
Actr6	0.0070627	-1.31318	0.021	0.114	1
Acoxl	0.00707662	-0.885649	0.01	0.094	1
Gm26526	0.00709213	-0.706036	0.156	0.315	1
Snx4	0.00709951	-0.582464	0.219	0.39	1
Itpa	0.00710188	-0.979771	0.104	0.237	1
Arfgap2	0.00714455	-0.306251	0.26	0.451	1
Foxj2	0.00714985	-0.431419	0.208	0.37	1
Zc3h12d	0.00715528	-0.476799	0.073	0.201	1
Tnfrsf18	0.00716664	0.392003	0.854	0.88	1
Farp1	0.00717198	-1.23434	0.062	0.175	1
Hist2h2ac	0.00721067	-2.78287	0	0.071	1
Fbxo44	0.00721067	-2.14838	0	0.071	1
Wscd2	0.00721067	-3.01994	0	0.071	1
Kcnj8	0.00721067	-2.42569	0	0.071	1
Cep95	0.00721067	-2.50701	0	0.071	1
Gm34794	0.00721067	-2.48338	0	0.071	1
Kdm7a	0.00727642	-0.372237	0.385	0.597	1
Naa16	0.00732683	-0.54182	0.104	0.24	1
Amz2	0.00732894	-0.631855	0.146	0.292	1
Esf1	0.00732898	-0.326203	0.177	0.334	1
Chd1	0.00734217	-0.287741	0.354	0.555	1
AC163354.1	0.00734522	-1.2838	0.083	0.208	1
Adipor1	0.00735123	-0.387652	0.458	0.669	1
Plekhg2	0.00740835	-0.480089	0.052	0.166	1
Yy1	0.00741222	-0.316771	0.448	0.633	1
Vdac2	0.00741328	-0.25034	0.552	0.753	1
Psmc1	0.00741407	-0.538664	0.385	0.588	1
Baz1b	0.0074218	-0.314368	0.271	0.455	1
Pogk	0.00742225	-0.844059	0.042	0.146	1
Rpl31	0.00743199	-0.259895	0.917	0.981	1
Phf8	0.00745865	-0.579648	0.104	0.244	1
Txndc17	0.0074596	-0.31253	0.625	0.825	1
Wtap	0.00749856	-0.312199	0.302	0.516	1
Ccdc50	0.00751152	-0.43636	0.25	0.412	1
Epas1	0.00752162	1.40705	0.354	0.26	1
Mmd	0.00752814	-0.78605	0.094	0.227	1
Nop14	0.00753351	-0.588155	0.146	0.299	1
Ptma	0.00755626	0.278369	0.99	0.997	1
Mpnd	0.00757466	-0.448659	0.135	0.282	1
Ube4b	0.00760322	-0.508268	0.125	0.276	1
Hdgfl3	0.00761298	-1.13138	0.083	0.208	1
Prdx4	0.00761608	1.42425	0.271	0.169	1
Abhd16a	0.00765051	-0.364147	0.146	0.299	1
1810022K09Rik	0.00766046	-0.311993	0.469	0.672	1
Crmp1	0.0076635	-0.379815	0.167	0.328	1
Ndufb11	0.00766861	-0.314535	0.667	0.87	1
Asf1a	0.0076935	-0.353591	0.135	0.295	1
Tmem38b	0.00771837	-1.38007	0.052	0.159	1
Eef1akmt2	0.00772935	-0.729756	0.104	0.237	1
Twf1	0.00774685	-0.379766	0.219	0.416	1
Eif3m	0.00775632	-0.275886	0.677	0.87	1
Vim	0.00778981	0.715897	0.885	0.958	1
Cwc15	0.00781401	-0.327118	0.604	0.825	1
Sf3b5	0.00781548	-0.250932	0.552	0.753	1
Fan1	0.0078463	-2.11639	0.01	0.091	1
1110051M20Rik	0.00789855	-2.05259	0.01	0.091	1
Golga4	0.00790317	-0.346171	0.281	0.471	1
Mrs2	0.00790801	-0.35986	0.104	0.244	1
Dmxl1	0.00792951	-0.408212	0.156	0.315	1
Mospd3	0.007966	-0.296729	0.062	0.182	1
Cops3	0.00797636	-0.428486	0.125	0.26	1
Atg14	0.00800375	-0.569125	0.062	0.182	1
Rpf1	0.00802974	-0.350036	0.229	0.409	1
Unk	0.00803542	-1.54674	0.021	0.11	1
Med14	0.00804316	-0.611261	0.146	0.292	1
Epb41	0.00804645	-0.25085	0.427	0.669	1
Lag3	0.00805778	0.38997	0.448	0.692	1
Apol9b	0.00807501	2.12837	0.125	0.049	1
Tmx3	0.00811497	-0.397821	0.292	0.484	1
Kif1bp	0.00813232	-1.44952	0.021	0.11	1
Msra	0.00815633	-1.29758	0.052	0.159	1
Kit	0.00819097	4.22247	0.073	0.019	1
Rnd1	0.00819097	3.15939	0.073	0.019	1
Ranbp10	0.00819768	-0.739844	0.104	0.237	1
Acot13	0.00819849	-0.849059	0.135	0.276	1
Cdc5l	0.00823682	-0.418363	0.333	0.542	1
Mrpl50	0.0082733	-0.798565	0.104	0.234	1
Mtmr10	0.00828112	2.00522	0.208	0.12	1
Rb1	0.00829429	-0.389883	0.25	0.412	1
Cycs	0.00829464	-0.338161	0.562	0.799	1
Synj2	0.00839359	-0.871563	0.073	0.192	1
Klhdc1	0.0083961	-0.744464	0.073	0.195	1
Chst12	0.00840509	-0.403586	0.062	0.175	1
Dpm2	0.00841982	-0.515789	0.125	0.269	1
Bdp1	0.00844118	-0.42428	0.167	0.331	1
Mrps34	0.00846147	-0.356085	0.344	0.539	1
Tmem167b	0.00848965	-0.474802	0.083	0.214	1
Adk	0.00851452	2.13095	0.177	0.091	1
Anxa5	0.00851579	-0.336979	0.427	0.614	1
Clec2i	0.00853535	-0.544277	0.094	0.224	1
Atg12	0.00854359	-0.285199	0.24	0.422	1
Nptn	0.00854542	-0.568999	0.312	0.481	1
Cyp4v3	0.00855023	0.313652	0.01	0.091	1
Hid1	0.00855079	-2.42374	0.031	0.123	1
Otud6b	0.00856677	-0.816528	0.062	0.175	1
Gpr83	0.00864571	3.97235	0.052	0.01	1
Timm17a	0.00866835	-0.284517	0.292	0.497	1
Zkscan14	0.00870591	-0.925445	0.104	0.231	1
5730480H06Rik	0.00871392	-1.40712	0.031	0.127	1
Gm29994	0.00874632	-2.46832	0	0.068	1
Tctex1d1	0.00875164	3.55639	0.052	0.01	1
Hmbs	0.00877231	-1.01273	0.094	0.218	1
Snx10	0.00879636	-0.381773	0.177	0.321	1
Abt1	0.00880845	-0.458672	0.188	0.351	1
Oard1	0.00881864	-0.59898	0.156	0.305	1
Pde5a	0.00885872	3.14966	0.052	0.01	1
Spa17	0.00885872	2.83921	0.052	0.01	1
Lbhd1	0.00885872	2.99564	0.052	0.01	1
Zfp53	0.0088617	-0.652787	0.083	0.211	1
Creb3l2	0.00887076	-0.404932	0.167	0.321	1
Klhl3	0.00887104	-2.59897	0.01	0.088	1
Hs6st1	0.00888283	2.02458	0.146	0.065	1
Pdcd11	0.00888424	-0.403808	0.146	0.295	1
Sec23a	0.00889296	-0.969541	0.021	0.11	1
Dctn5	0.0089211	-0.65873	0.104	0.234	1
Pdxp	0.0089229	-1.83298	0.021	0.107	1
Fbxo9	0.00893103	-0.663694	0.135	0.279	1
Nhp2	0.00896617	-0.429567	0.24	0.416	1
Icos	0.00896763	0.386365	0.948	0.968	1
Zfp110	0.00898747	-0.554481	0.073	0.195	1
Spast	0.00899824	-0.553318	0.083	0.211	1
Ccdc137	0.00899905	-0.429613	0.021	0.11	1
Srek1ip1	0.00908294	-0.429786	0.094	0.227	1
Rtf1	0.00914703	-0.261193	0.562	0.727	1
Tubgcp4	0.00914933	-0.455374	0.094	0.221	1
Dock8	0.00915682	-0.497145	0.333	0.529	1
A430005L14Rik	0.00916747	-0.743599	0.083	0.208	1
Scaf1	0.00916837	-0.269185	0.125	0.273	1
Ppargc1b	0.00917092	-2.50347	0.01	0.088	1
Pdcd5	0.00924174	-0.284307	0.542	0.763	1
Chkb	0.00929225	-0.880989	0.115	0.253	1
Nck1	0.0092949	-0.320417	0.094	0.231	1
Cetn4	0.00932926	-1.08608	0.062	0.175	1
Mzt2	0.00938182	-1.04747	0.052	0.156	1
Zcchc8	0.00938262	-0.620296	0.135	0.282	1
Tnrc6c	0.0094108	-0.462576	0.312	0.503	1
Minos1	0.00943746	-0.289641	0.667	0.844	1
Ikbkg	0.00946421	-0.871532	0.083	0.201	1
Ppp1r7	0.00946912	-0.702268	0.167	0.318	1
Pcgf6	0.00947352	-0.438128	0.021	0.107	1
Meaf6	0.00950147	-0.617821	0.135	0.279	1
Ifngr2	0.00952896	2.73559	0.115	0.045	1
Eif5	0.00956337	0.410161	0.833	0.821	1
Dclre1c	0.00959656	-0.630836	0.062	0.175	1
Impdh2	0.00964063	-0.560455	0.229	0.396	1
Dgcr6	0.00966796	1.94466	0.167	0.081	1
Got1	0.00967651	1.04781	0.635	0.601	1
P2rx4	0.0097566	1.61283	0.271	0.172	1
Tusc3	0.0097769	-0.405905	0.177	0.334	1
Psmb6	0.00978764	-0.335114	0.625	0.795	1
Psmg4	0.00986651	-0.466925	0.312	0.5	1
Ccdc92	0.00987067	-0.672425	0.062	0.175	1
Sf3b4	0.00990067	-0.385882	0.24	0.422	1
Ddost	0.00990205	-0.273577	0.448	0.679	1
Tbc1d10b	0.00994293	-0.597759	0.177	0.325	1
Zranb1	0.00997141	-0.343053	0.24	0.438	1
Gas2l3	0.00999477	2.75085	0.083	0.026	1
BC029722	0.0100516	-0.394502	0.146	0.292	1
H2-Oa	0.0100583	1.71078	0.26	0.166	1
Srp9	0.0100883	-0.264762	0.729	0.899	1
Atp5f1	0.0100895	-0.28731	0.729	0.909	1
Cpd	0.0101446	1.1684	0.406	0.308	1
Gmnn	0.010145	-0.52003	0.125	0.266	1
Cpq	0.0101674	2.43543	0.083	0.026	1
Snx11	0.0101781	-0.402005	0.042	0.143	1
Pld3	0.0101791	-0.383802	0.531	0.76	1
Tnks1bp1	0.0102077	-2.02945	0.021	0.104	1
Thada	0.0102077	-2.12181	0.021	0.104	1
Ntrk3	0.0102175	-1.31367	0.031	0.123	1
Zfp414	0.0102219	-0.493228	0.083	0.208	1
Slc48a1	0.0102325	-0.574624	0.208	0.37	1
Gpkow	0.010247	-0.486706	0.083	0.198	1
Mrpl54	0.0102594	-0.412684	0.406	0.614	1
Pop7	0.0102599	-0.283314	0.219	0.383	1
Ube2j2	0.0102773	-0.377292	0.396	0.588	1
Ykt6	0.0104041	-0.334126	0.198	0.36	1
Blvra	0.0104042	-0.602817	0.167	0.315	1
Treml2	0.0104312	2.7602	0.083	0.026	1
Gorab	0.0104794	-0.498547	0.021	0.107	1
Tada2b	0.0104794	-0.802427	0.021	0.107	1
Sh3bp1	0.0104834	-0.545093	0.208	0.373	1
Rtn4	0.0104963	-0.522202	0.448	0.643	1
Cox18	0.0105058	-0.689764	0.083	0.205	1
Commd6	0.0105082	-0.287673	0.25	0.438	1
Lpin1	0.0105482	-0.415277	0.104	0.237	1
Ercc6l2	0.0105604	-0.954701	0.031	0.123	1
Grap2	0.0105736	-0.292823	0.469	0.669	1
Slc25a53	0.0106082	-2.82068	0	0.065	1
Tamm41	0.0106082	-2.36111	0	0.065	1
Mical2	0.0106082	-2.42197	0	0.065	1
Hist1h4h	0.0106082	-2.435	0	0.065	1
Fam89b	0.0106082	-2.0475	0	0.065	1
Rab27a	0.0106136	-0.451873	0.24	0.422	1
Rhot1	0.0106137	-0.703601	0.083	0.198	1
Dcaf5	0.0106177	-0.537384	0.156	0.299	1
Tmsb15b1	0.0106266	-0.419066	0.073	0.188	1
Podnl1	0.010629	-0.651172	0.271	0.432	1
Arl8a	0.0106475	-0.330669	0.167	0.325	1
Irf3	0.0106593	-0.529183	0.156	0.305	1
Zcchc17	0.0107037	-0.5607	0.229	0.396	1
Rab8a	0.0107104	-0.329882	0.542	0.714	1
Rnf213	0.0107675	0.963609	0.49	0.412	1
Zgpat	0.0108179	-0.620623	0.156	0.302	1
Zfp959	0.0108367	-1.71553	0.021	0.104	1
Katnb1	0.0108374	-1.33154	0.052	0.153	1
Insig2	0.0108679	-0.79114	0.073	0.188	1
Smurf1	0.0109837	-0.958324	0.052	0.156	1
Tmem165	0.0109926	-0.386191	0.167	0.318	1
Dnajc12	0.0110049	-2.21984	0.01	0.084	1
Dis3l2	0.0110182	-0.502002	0.083	0.205	1
Cnpy4	0.011032	-1.68833	0.021	0.104	1
Atxn1	0.0110589	-0.380468	0.51	0.721	1
Bola1	0.0110914	-0.840572	0.052	0.156	1
Cenpc1	0.0110919	-0.559196	0.115	0.244	1
Faf2	0.0110952	-0.750457	0.177	0.325	1
Naa50	0.011139	-0.298343	0.271	0.445	1
Exoc6b	0.0111457	-0.819275	0.052	0.156	1
Chordc1	0.0111651	-0.300124	0.177	0.338	1
Ppp1r14b	0.0112292	0.693828	0.562	0.519	1
Sertad2	0.0112792	-0.2947	0.24	0.422	1
Klc2	0.0112996	-2.05148	0.01	0.084	1
Wdr55	0.011311	-1.32827	0.042	0.136	1
Ehd1	0.0113156	-0.254126	0.594	0.844	1
1700019D03Rik	0.0113369	3.0527	0.021	0	1
Igfbp5	0.0113369	5.51591	0.021	0	1
G530012D18Rik	0.0113369	3.11142	0.021	0	1
Rxrg	0.0113369	3.85854	0.021	0	1
Cdc42bpa	0.0113369	2.89917	0.021	0	1
Bmp2	0.0113369	6.93141	0.021	0	1
Cacna1f	0.0113369	3.5791	0.021	0	1
Maged1	0.0113369	3.63671	0.021	0	1
Kctd12b	0.0113369	3.6912	0.021	0	1
Cdkl5	0.0113369	3.22729	0.021	0	1
Lhfp	0.0113369	4.04093	0.021	0	1
P2ry1	0.0113369	3.772	0.021	0	1
Lrrc71	0.0113369	3.52178	0.021	0	1
Bcar3	0.0113369	3.59897	0.021	0	1
Gm43653	0.0113369	3.64736	0.021	0	1
Gm31243	0.0113369	3.71507	0.021	0	1
Car8	0.0113369	3.3727	0.021	0	1
Ptgr1	0.0113369	3.41881	0.021	0	1
Mpdz	0.0113369	3.48868	0.021	0	1
Cd164l2	0.0113369	3.52178	0.021	0	1
Kif17	0.0113369	3.27843	0.021	0	1
Msx1	0.0113369	3.54566	0.021	0	1
Rflna	0.0113369	3.37093	0.021	0	1
Serpine1	0.0113369	3.09936	0.021	0	1
Muc3a	0.0113369	3.61778	0.021	0	1
Flt3	0.0113369	3.10034	0.021	0	1
4921507P07Rik	0.0113369	4.04538	0.021	0	1
Pde1c	0.0113369	4.74176	0.021	0	1
M1ap	0.0113369	3.35385	0.021	0	1
2025-03-08	0.0113369	3.56206	0.021	0	1
Alox5	0.0113369	3.4816	0.021	0	1
Vwf	0.0113369	3.48498	0.021	0	1
Mzf1	0.0113369	4.13996	0.021	0	1
Zfp536	0.0113369	4.03959	0.021	0	1
Trim6	0.0113369	3.11142	0.021	0	1
Hsd3b7	0.0113369	3.52008	0.021	0	1
Dock1	0.0113369	2.91679	0.021	0	1
Mgmt	0.0113369	3.79539	0.021	0	1
Stab2	0.0113369	3.56293	0.021	0	1
Nav3	0.0113369	3.2323	0.021	0	1
Gm3739	0.0113369	4.23797	0.021	0	1
Pou2af1	0.0113369	4.68392	0.021	0	1
Inpp5j	0.0113369	3.18792	0.021	0	1
Eml6	0.0113369	3.91794	0.021	0	1
Fam183b	0.0113369	3.09751	0.021	0	1
Slc47a1	0.0113369	3.50046	0.021	0	1
Asgr2	0.0113369	3.39833	0.021	0	1
Tmem98	0.0113369	3.19081	0.021	0	1
Chad	0.0113369	3.95274	0.021	0	1
Tns4	0.0113369	4.40899	0.021	0	1
Aoc2	0.0113369	3.29552	0.021	0	1
Cygb	0.0113369	3.36768	0.021	0	1
Gm47127	0.0113369	3.18331	0.021	0	1
Deptor	0.0113369	3.18193	0.021	0	1
Nptxr	0.0113369	3.83029	0.021	0	1
Cldn5	0.0113369	3.31775	0.021	0	1
Kalrn	0.0113369	3.47601	0.021	0	1
Fstl1	0.0113369	3.58255	0.021	0	1
Sox8	0.0113369	3.9868	0.021	0	1
Ppic	0.0113369	3.21231	0.021	0	1
Gm47242	0.0113369	3.62629	0.021	0	1
Sorcs1	0.0113369	4.79961	0.021	0	1
Tmlhe	0.0113369	4.78271	0.021	0	1
Dnah7a	0.0113369	4.14449	0.021	0	1
Il1f9	0.0113369	3.04819	0.021	0	1
Olfr1259	0.0113369	3.91058	0.021	0	1
Gm26745	0.0113369	2.95473	0.021	0	1
Gm12709	0.0113369	3.35442	0.021	0	1
Cers5	0.011347	-0.48662	0.156	0.299	1
Polg2	0.0113838	-0.316314	0.094	0.214	1
Syap1	0.0114219	-0.474023	0.198	0.36	1
Srsf1	0.0114867	-0.485058	0.271	0.435	1
Cd200	0.011501	-0.605342	0.146	0.279	1
BC147527	0.0115252	-2.06023	0.01	0.084	1
Atf2	0.0115374	-0.312937	0.229	0.393	1
Tmem242	0.0115455	-0.423196	0.115	0.25	1
Pgd	0.0115779	-0.307045	0.219	0.399	1
Ndufaf3	0.0115876	-0.471098	0.177	0.331	1
Pdhb	0.0115934	-0.420001	0.396	0.607	1
Abcd1	0.0116208	-1.11036	0.042	0.14	1
Dusp14	0.011673	-1.0447	0.073	0.188	1
Sugp2	0.0116803	-0.991337	0.042	0.14	1
1110004E09Rik	0.0117276	-1.13818	0.042	0.136	1
Ccdc85b	0.0117338	-0.922735	0.083	0.198	1
Tmem11	0.0117651	-0.427741	0.146	0.295	1
Cish	0.0118445	0.402708	0.896	0.89	1
Cables1	0.0118448	-1.1657	0.021	0.104	1
Vps52	0.011874	-0.480777	0.094	0.221	1
Ring1	0.0118921	-0.403097	0.094	0.224	1
Fance	0.0119075	-1.18504	0.031	0.12	1
Pam16	0.011914	-0.274069	0.292	0.474	1
Stard3nl	0.0119284	-0.441793	0.198	0.364	1
Gdap2	0.0119883	-0.570686	0.073	0.188	1
Gm11423	0.0119885	-1.6424	0.01	0.084	1
Vkorc1l1	0.0120386	-1.35404	0.031	0.12	1
Ggps1	0.0120612	-0.305906	0.156	0.308	1
Armcx5	0.0120722	-0.34495	0.094	0.214	1
Cyhr1	0.0120872	-0.409039	0.229	0.393	1
Traf3ip3	0.0120959	-0.424125	0.271	0.471	1
Naxe	0.0120968	-0.454318	0.208	0.37	1
Endog	0.0121666	-0.594874	0.042	0.14	1
Golga5	0.0121682	-0.402012	0.125	0.26	1
Nsmce2	0.0122002	-0.348217	0.24	0.403	1
Tnfsf11	0.012235	-1.16798	0.156	0.276	1
Prrc2c	0.0122707	0.524688	0.833	0.873	1
Mxi1	0.0123175	-0.256442	0.406	0.607	1
Wdr83os	0.0123194	-0.412547	0.417	0.614	1
E130208F15Rik	0.0123464	-1.39935	0.042	0.136	1
Rtl8b	0.0123752	-0.45645	0.094	0.221	1
Flicr	0.0123759	3.83087	0.042	0.006	1
Adgrl2	0.0123759	3.80403	0.042	0.006	1
Klhdc8b	0.0123759	3.59233	0.042	0.006	1
Pip5k1b	0.0123759	4.62738	0.042	0.006	1
Rfwd3	0.0123833	-0.790913	0.073	0.182	1
Mettl5	0.0123864	-0.716779	0.062	0.172	1
Flcn	0.0124158	-0.749077	0.021	0.104	1
Lpin2	0.0124422	-0.537542	0.198	0.36	1
Sdc3	0.0124733	1.57365	0.188	0.097	1
Stk25	0.0124891	-0.440087	0.115	0.25	1
Pctp	0.0125439	3.02249	0.042	0.006	1
Chchd3	0.0125785	-0.397374	0.271	0.455	1
Gmfg	0.0125938	-0.254336	0.802	0.942	1
Smim26	0.0126046	-0.487149	0.156	0.305	1
Abhd4	0.0126708	-0.648688	0.042	0.14	1
Atr	0.0127233	1.6088	0.24	0.146	1
Tmem203	0.0127326	-0.274413	0.146	0.299	1
Lsm5	0.01275	-0.386001	0.49	0.711	1
Tmem263	0.0128565	-0.324039	0.094	0.224	1
Dgkq	0.0128664	-2.49506	0	0.062	1
Sult2b1	0.0128664	-2.10046	0	0.062	1
Thop1	0.0128664	-2.08164	0	0.062	1
Ska2	0.0128664	-2.64393	0	0.062	1
Edaradd	0.0128664	-2.59107	0	0.062	1
Kif13b	0.0128837	-0.31938	0.146	0.289	1
Irak3	0.0128859	2.76408	0.042	0.006	1
Rcn1	0.0129196	-0.737273	0.115	0.24	1
Fam46a	0.0129656	1.83566	0.458	0.406	1
Mpp1	0.0129827	-0.740148	0.052	0.153	1
Ppp2r1a	0.0130137	-0.39421	0.375	0.584	1
Gabarapl1	0.0130269	-0.776381	0.177	0.315	1
Bnip2	0.0130377	-0.353093	0.344	0.545	1
Nek6	0.013044	-0.686	0.104	0.234	1
Upp2	0.01306	2.17573	0.042	0.006	1
Cald1	0.01306	2.34321	0.042	0.006	1
mt-Atp8	0.0130679	0.442011	0.812	0.909	1
Rmnd5b	0.0131168	-0.349701	0.167	0.321	1
Aspscr1	0.0131342	-0.709153	0.167	0.308	1
Trip11	0.0131495	-0.444629	0.344	0.532	1
Prkch	0.0131683	-0.317233	0.531	0.724	1
Rc3h2	0.0132528	-0.321055	0.281	0.455	1
Gart	0.0132633	-1.01012	0.052	0.149	1
Cir1	0.0132918	-0.285431	0.417	0.607	1
Nubp1	0.013334	-0.276929	0.271	0.455	1
Sap30bp	0.0133417	-0.594473	0.125	0.26	1
Tpd52	0.0133514	1.59824	0.188	0.101	1
Sbf2	0.0133939	2.90458	0.062	0.016	1
2025-09-08	0.013394	1.53484	0.104	0.039	1
Sec61a2	0.0134217	-1.03946	0.031	0.12	1
Tbc1d8b	0.0134659	-2.17994	0.01	0.081	1
Cyb561d2	0.0134952	-0.511514	0.125	0.26	1
Herc4	0.0135554	1.09566	0.458	0.416	1
Gde1	0.0135566	-0.412779	0.229	0.409	1
Sv2c	0.0135653	1.37639	0.375	0.305	1
Zdhhc4	0.013583	-0.393067	0.073	0.185	1
Golt1b	0.0136116	-0.562121	0.156	0.299	1
Eif2ak3	0.0136352	-0.656423	0.062	0.166	1
Ganab	0.0136656	-0.691735	0.156	0.295	1
Srpk2	0.0137031	-0.453177	0.292	0.487	1
Gm13012	0.0137043	-1.45371	0.021	0.101	1
Ten1	0.0137141	-0.384376	0.25	0.412	1
5830432E09Rik	0.0137341	-2.04253	0.01	0.081	1
Tasp1	0.0137405	1.51142	0.229	0.14	1
Myef2	0.0137407	-0.432103	0.146	0.292	1
Tsta3	0.0137501	-0.784288	0.135	0.266	1
Zfhx2	0.0137657	-0.639531	0.062	0.169	1
Ddx3x	0.013783	0.629489	0.771	0.805	1
Ube2d1	0.013788	-0.456792	0.135	0.276	1
Lama5	0.0137984	2.73313	0.062	0.016	1
Dhx35	0.0138246	-2.2604	0.01	0.081	1
Ncstn	0.0138618	-0.470327	0.146	0.289	1
Relt	0.0138664	-1.39748	0.021	0.101	1
Trappc2	0.0138694	-1.43581	0.031	0.117	1
Adam15	0.0138741	-0.91159	0.042	0.133	1
Mrpl45	0.0139044	-0.397879	0.083	0.201	1
Atp10a	0.0139126	0.29011	0.135	0.279	1
Gsto1	0.013918	-0.471873	0.115	0.244	1
Coq8a	0.0139451	-1.14211	0.031	0.117	1
Mrps18c	0.0139482	-0.28257	0.406	0.61	1
Plpp6	0.013951	-0.536893	0.042	0.136	1
Cs	0.013965	-0.384598	0.323	0.513	1
Paip2	0.0140244	-0.304506	0.583	0.769	1
Isoc2b	0.0140341	-1.05987	0.073	0.179	1
Rcor1	0.0140656	-0.61637	0.156	0.295	1
Rpf2	0.0140965	-0.946814	0.073	0.179	1
Cinp	0.0141487	-0.576346	0.073	0.182	1
Nfatc3	0.0141727	-0.406069	0.458	0.646	1
Tnf	0.0141952	0.542302	0.219	0.399	1
Ccr4	0.0142077	1.35002	0.094	0.032	1
Uqcrc2	0.0142737	-0.325693	0.448	0.672	1
Fam169b	0.0143216	-0.396387	0.26	0.425	1
Ehmt1	0.0143358	-0.480116	0.104	0.231	1
Ndufs2	0.0143461	-0.434452	0.302	0.468	1
2010107E04Rik	0.0144559	-0.289189	0.802	0.932	1
Kdm6a	0.0144616	-0.264688	0.323	0.529	1
Gm29243	0.0144855	-1.05487	0.094	0.208	1
Ruvbl1	0.0144903	-0.58559	0.135	0.266	1
Zbtb7a	0.014513	-0.255764	0.385	0.568	1
Nr4a3	0.0145206	-0.358023	0.344	0.539	1
Chchd1	0.0145849	-0.276249	0.354	0.532	1
Trappc6a	0.0146441	-0.31779	0.323	0.484	1
Parp6	0.014746	-0.70932	0.042	0.136	1
Hps4	0.0147503	-0.985325	0.052	0.149	1
Tubgcp2	0.0147602	-0.86712	0.115	0.234	1
Mfsd5	0.0147879	-0.450918	0.094	0.208	1
Acod1	0.0148033	1.47378	0.125	0.055	1
Timm21	0.0148228	-1.1029	0.042	0.133	1
Hspa4	0.0148498	0.995198	0.573	0.565	1
Tnks2	0.0149091	-0.373667	0.333	0.506	1
Tox2	0.0149456	-2.21782	0.021	0.097	1
Sidt1	0.0149628	-1.18837	0.031	0.117	1
Pycard	0.0149704	-0.250507	0.615	0.792	1
Swap70	0.0150237	2.10543	0.146	0.071	1
Tmem63a	0.0150437	1.96436	0.156	0.078	1
Arhgap11a	0.0150446	-2.02861	0.031	0.114	1
Gphn	0.0150492	-1.0966	0.01	0.081	1
Apaf1	0.0151038	-0.313503	0.292	0.474	1
Kmt2a	0.0151069	-0.363251	0.5	0.734	1
Abcb1b	0.0151274	-0.339319	0.135	0.269	1
Ints9	0.0151518	-0.637969	0.073	0.185	1
Kpna3	0.0151525	-0.474675	0.135	0.266	1
Lrrfip2	0.0151559	-0.554372	0.219	0.367	1
Selplg	0.0151901	0.374732	0.885	0.922	1
AI480526	0.0152068	-0.758295	0.031	0.117	1
Hbb-bs	0.0152118	1.43189	0.104	0.039	1
Ssbp1	0.0152543	-0.272267	0.302	0.487	1
Ss18	0.0152706	-0.271546	0.302	0.506	1
Abtb2	0.0152859	-1.15463	0.083	0.192	1
Gabbr1	0.0153238	-0.277917	0.167	0.321	1
Paxip1	0.0153308	-0.739512	0.073	0.179	1
St3gal3	0.0153491	-0.628533	0.042	0.136	1
Nostrin	0.0154167	3.49713	0.031	0.003	1
Plekhg1	0.0154167	3.74677	0.031	0.003	1
Zfp433	0.0154167	4.24258	0.031	0.003	1
Zdhhc1	0.0154167	3.64677	0.031	0.003	1
Zfp503	0.0154167	4.73913	0.031	0.003	1
Tmigd1	0.0154167	3.72299	0.031	0.003	1
[truncated: 7,183 more rows]
